# Supplementary material for: Expedient synthesis of novel 1,4-benzoxazine and butenolide derivatives
Source: Royal Society of Chemistry journal article supplement (doi:10.1039/c4ra01736f), 2014-01-01

## **Electronic Supplementary Information**

### **Expedient Synthesis of Novel 1,4-Benzoxazine and Butenolide Derivatives**

Garima Choudhary, Ram Tilak Naganaboina and Rama Krishna Peddinti\*

<sup>1</sup>H and <sup>13</sup>C NMR Spectra

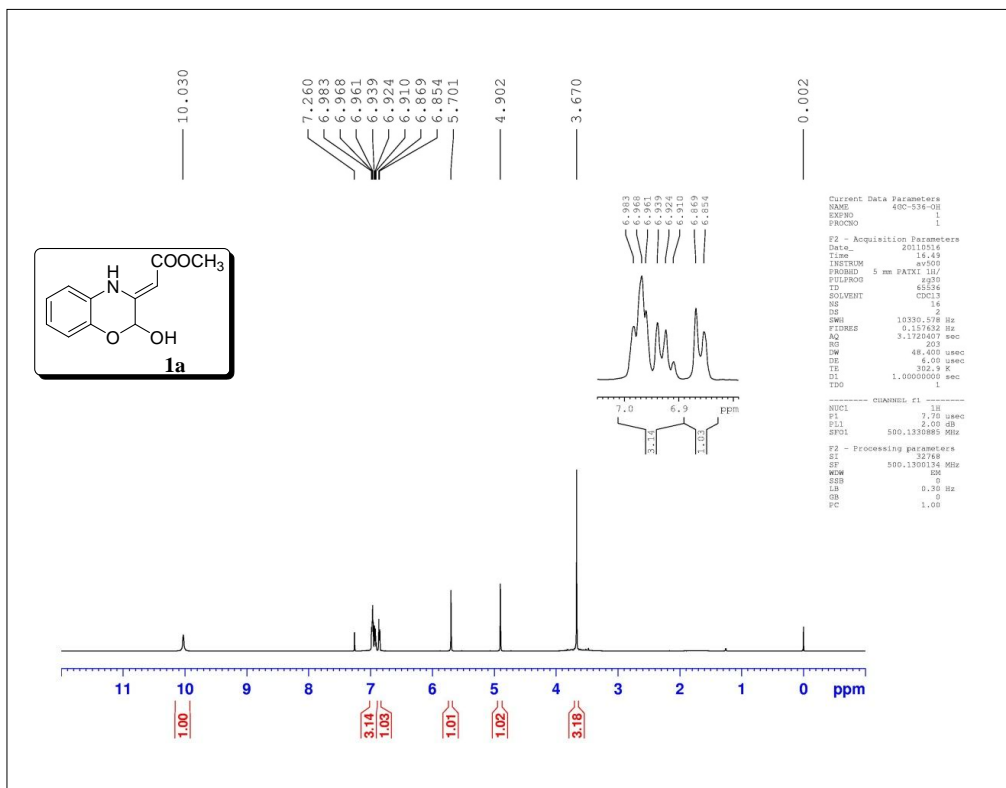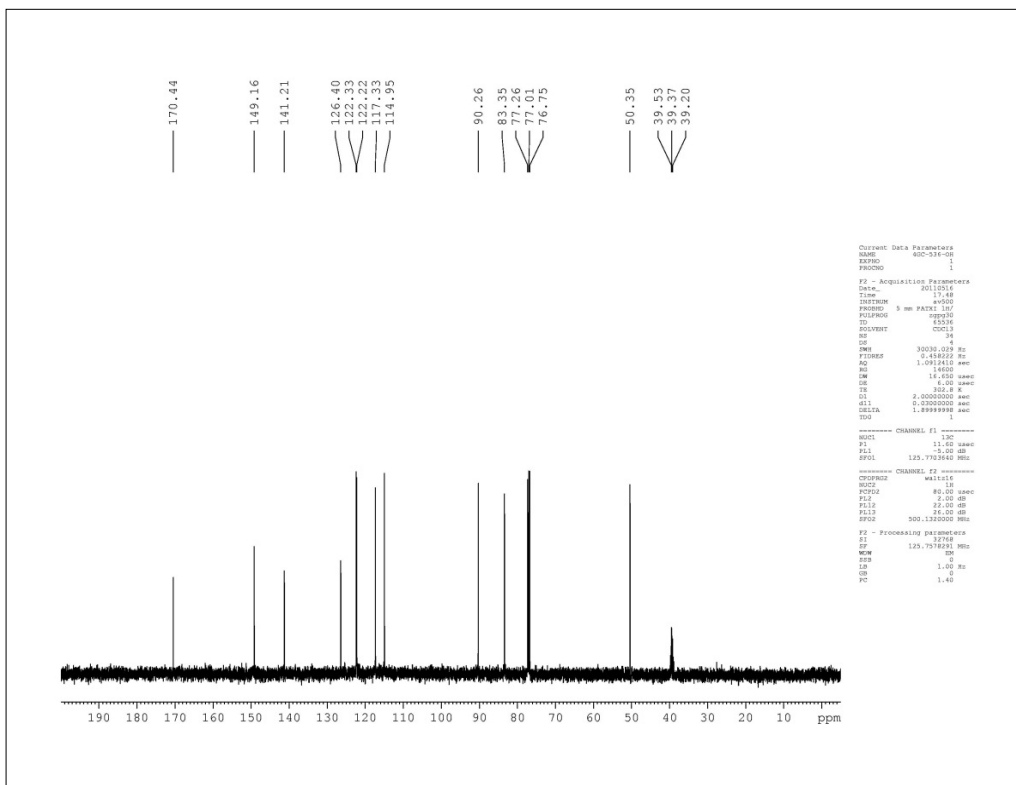

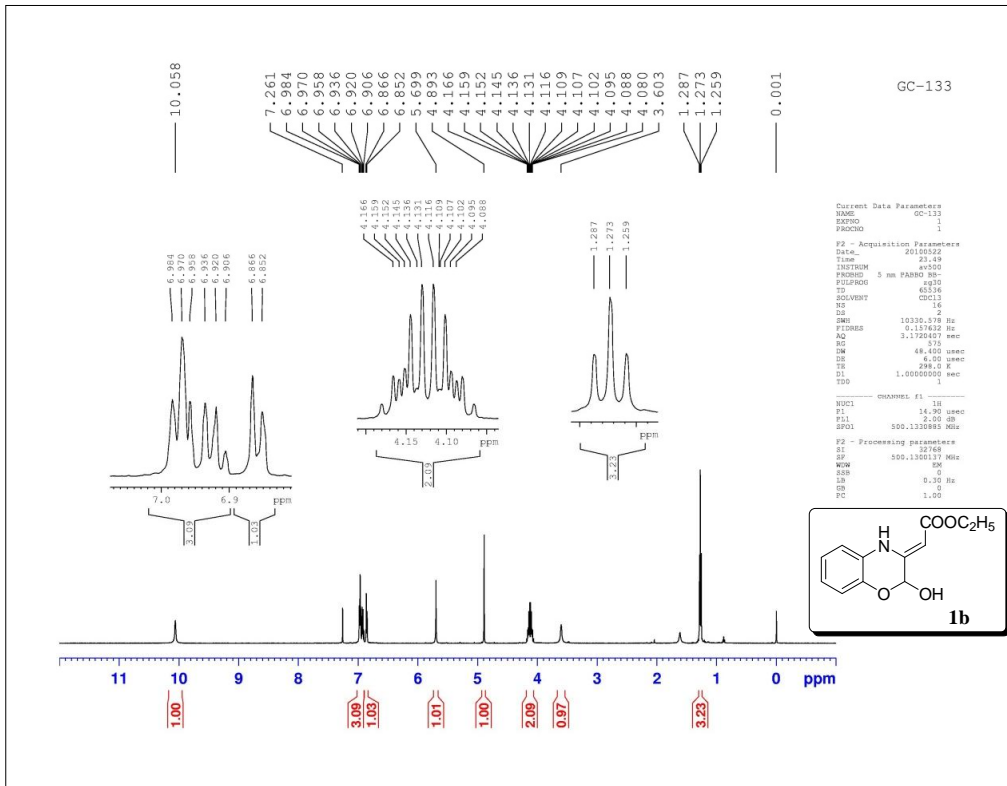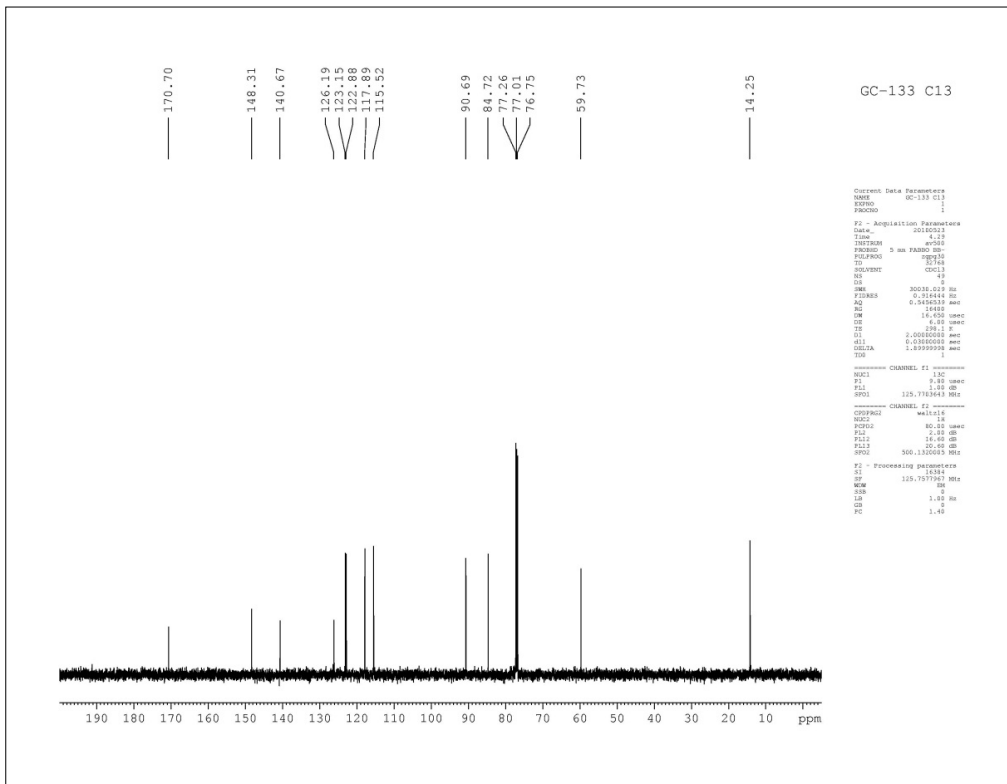

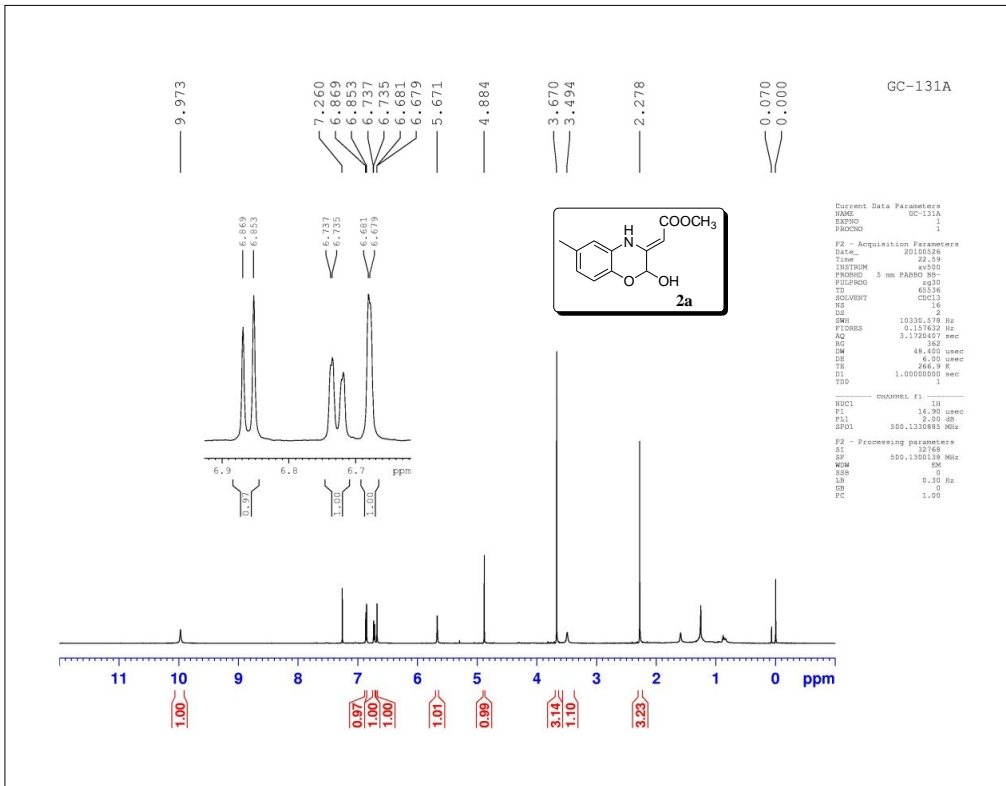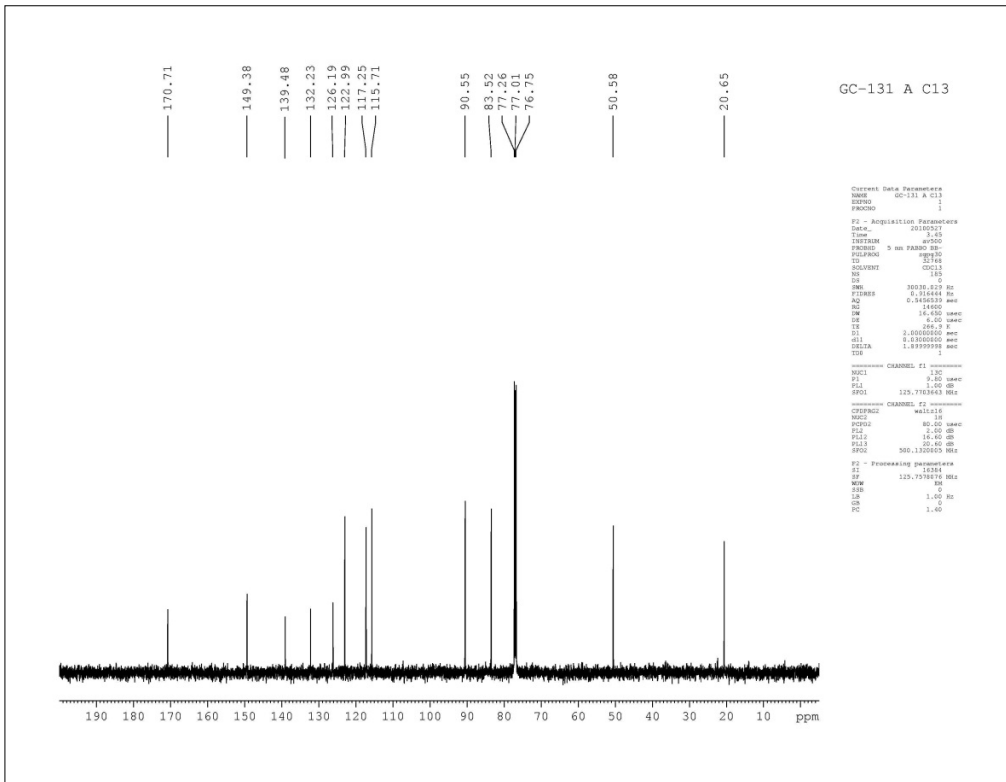

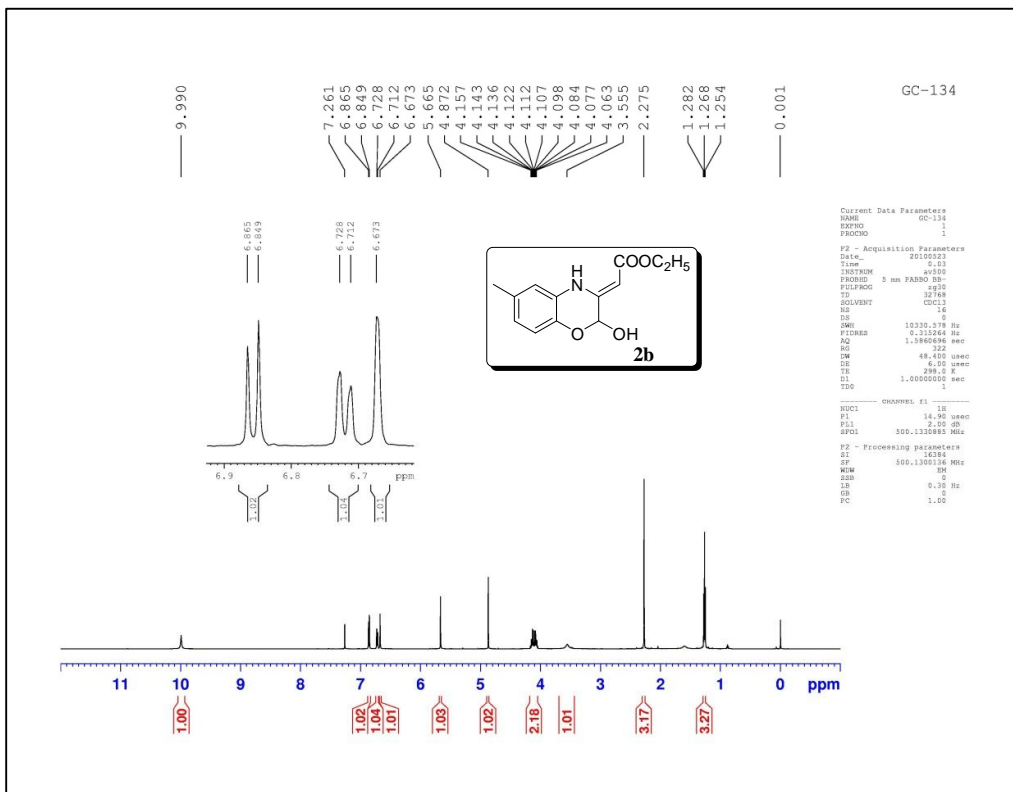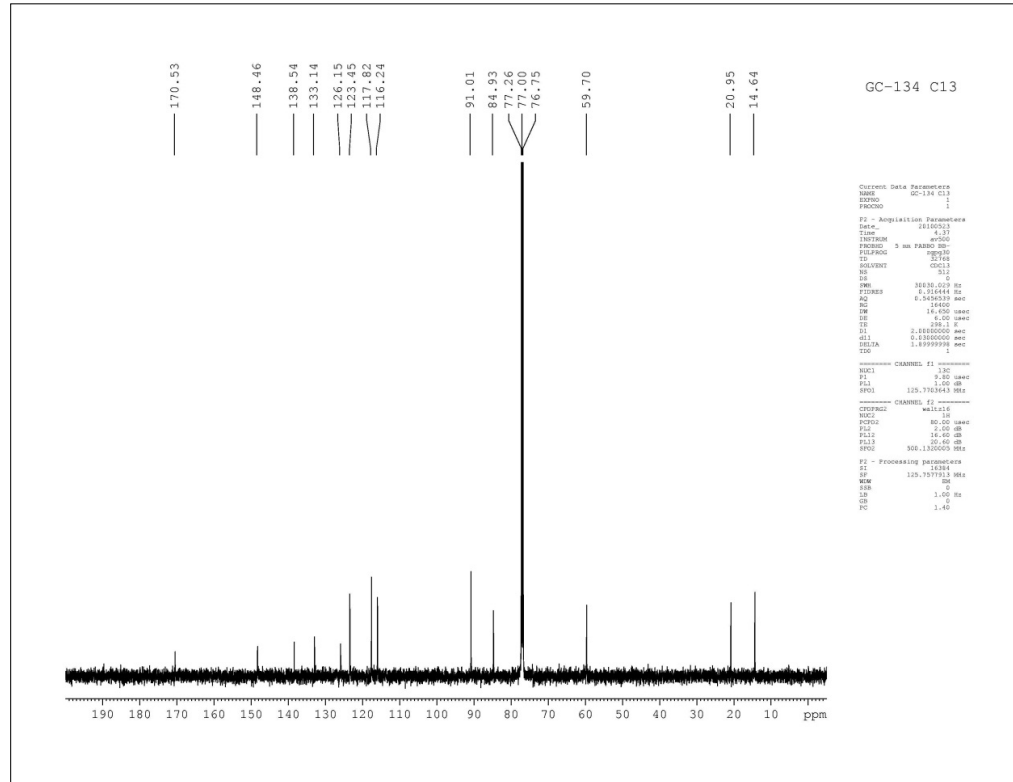

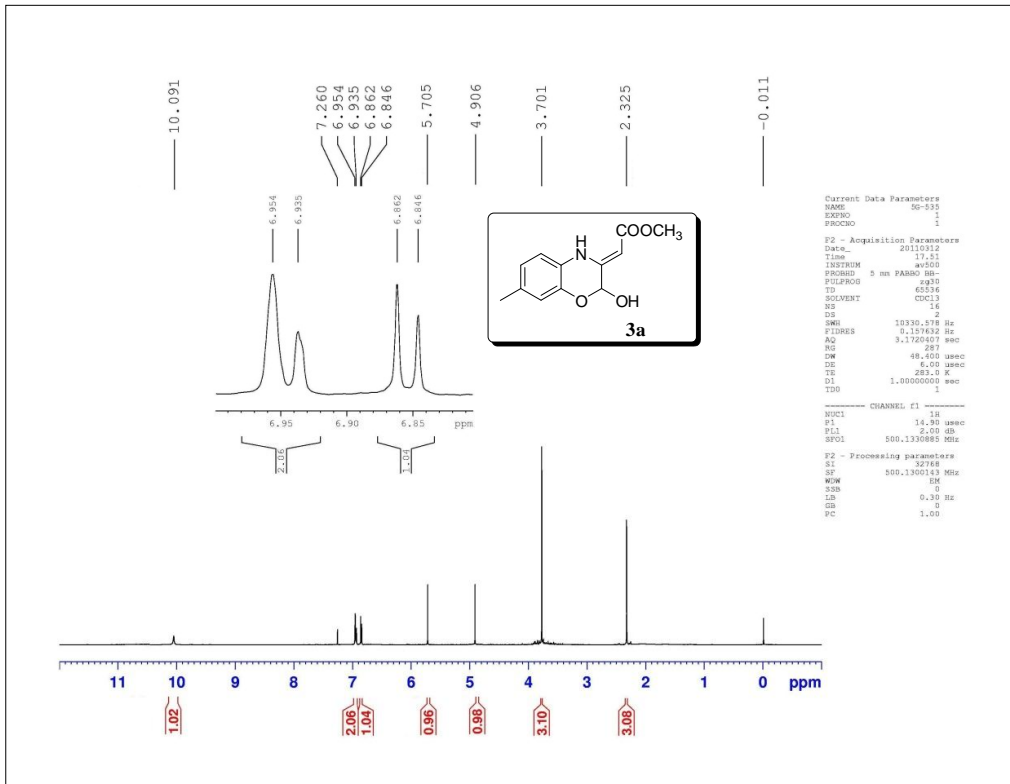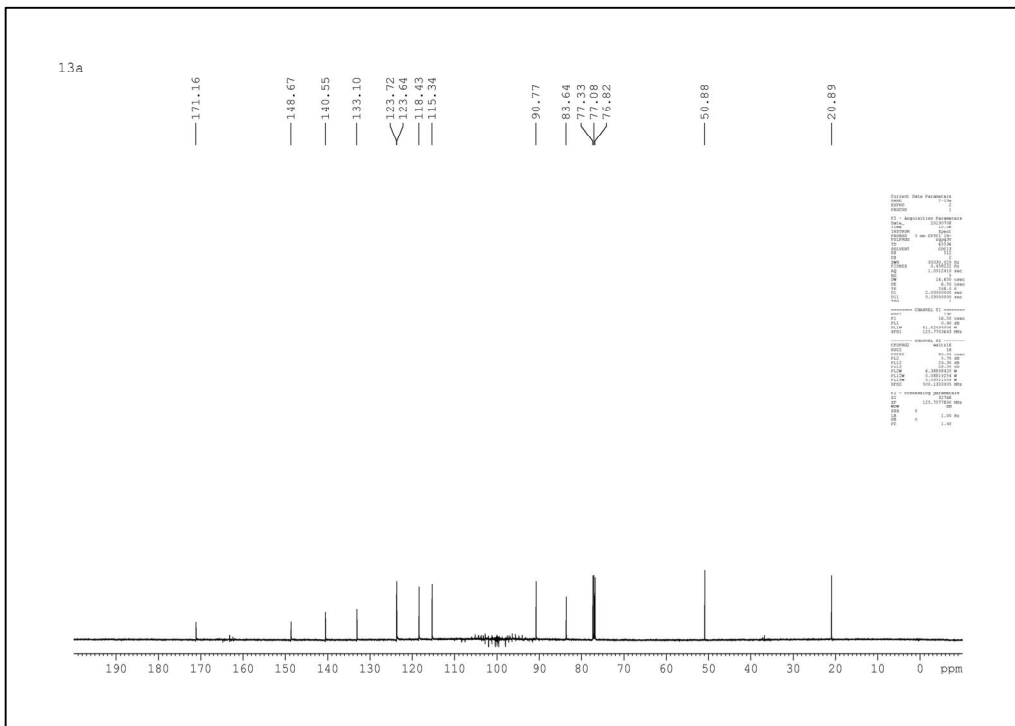

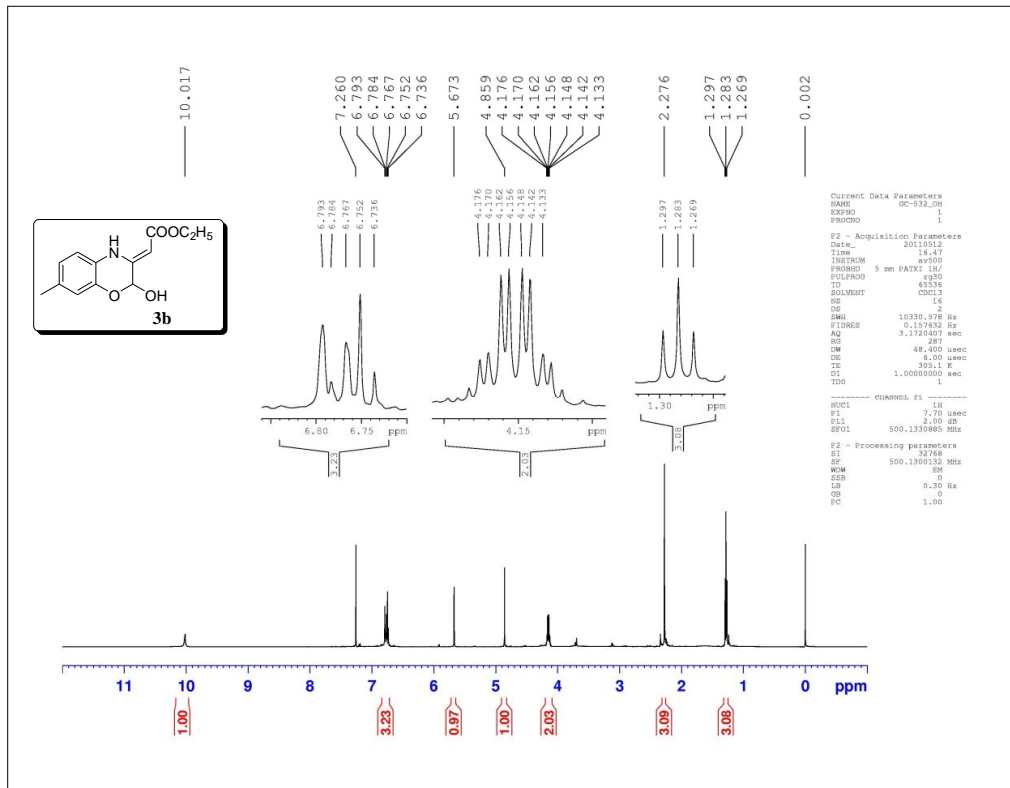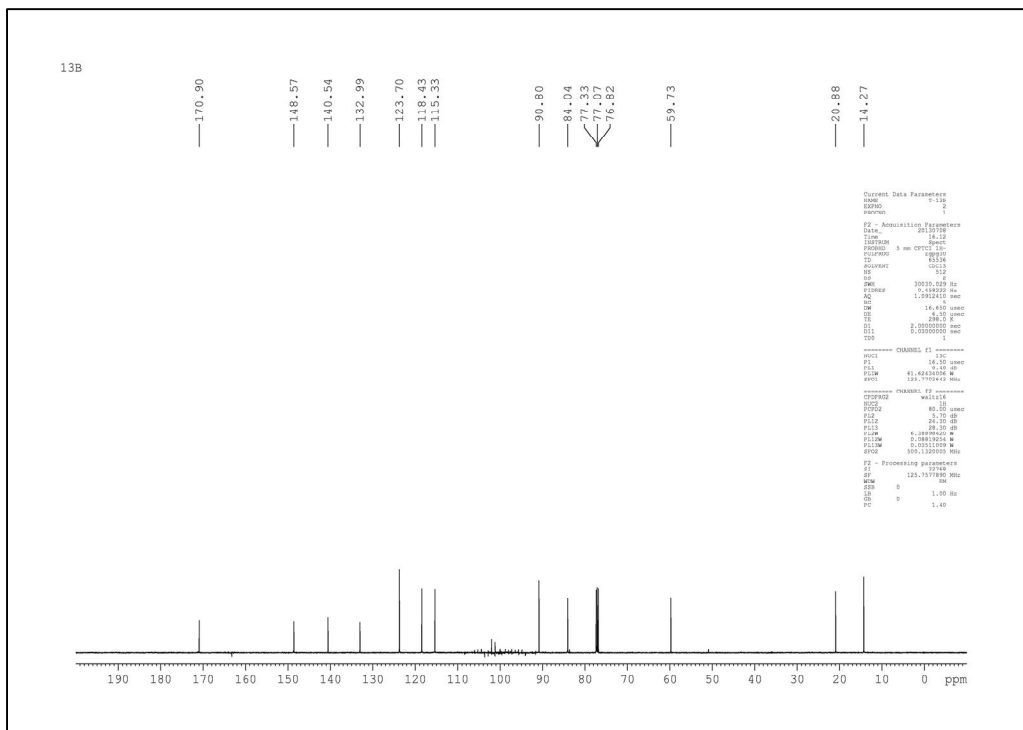

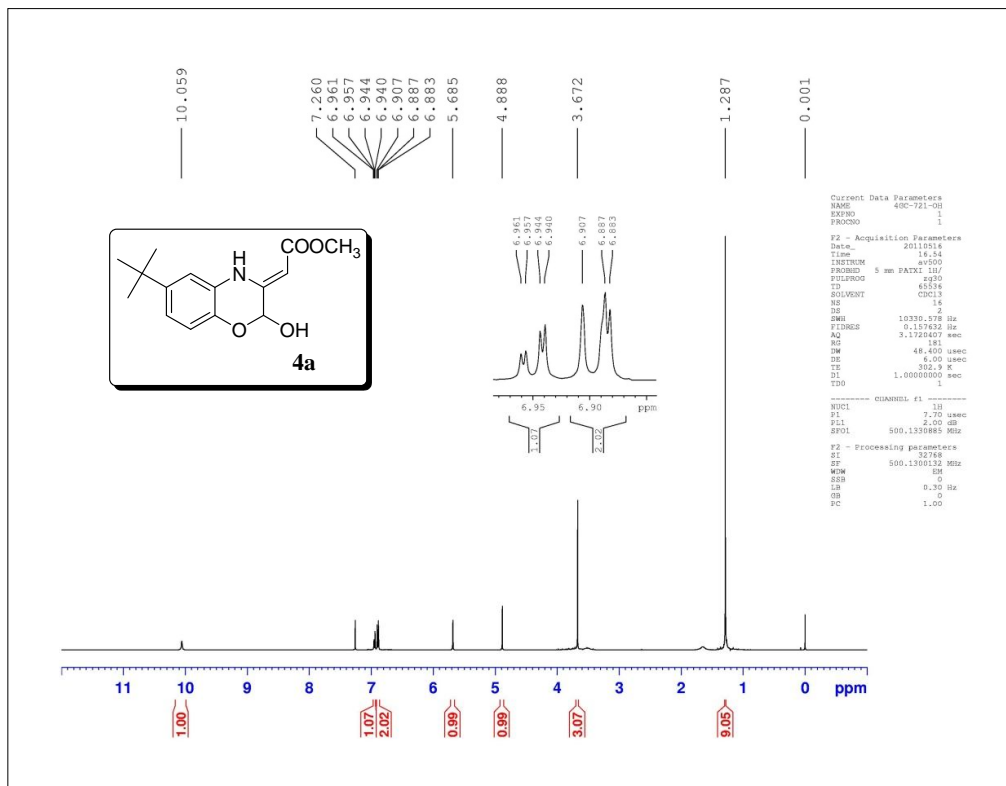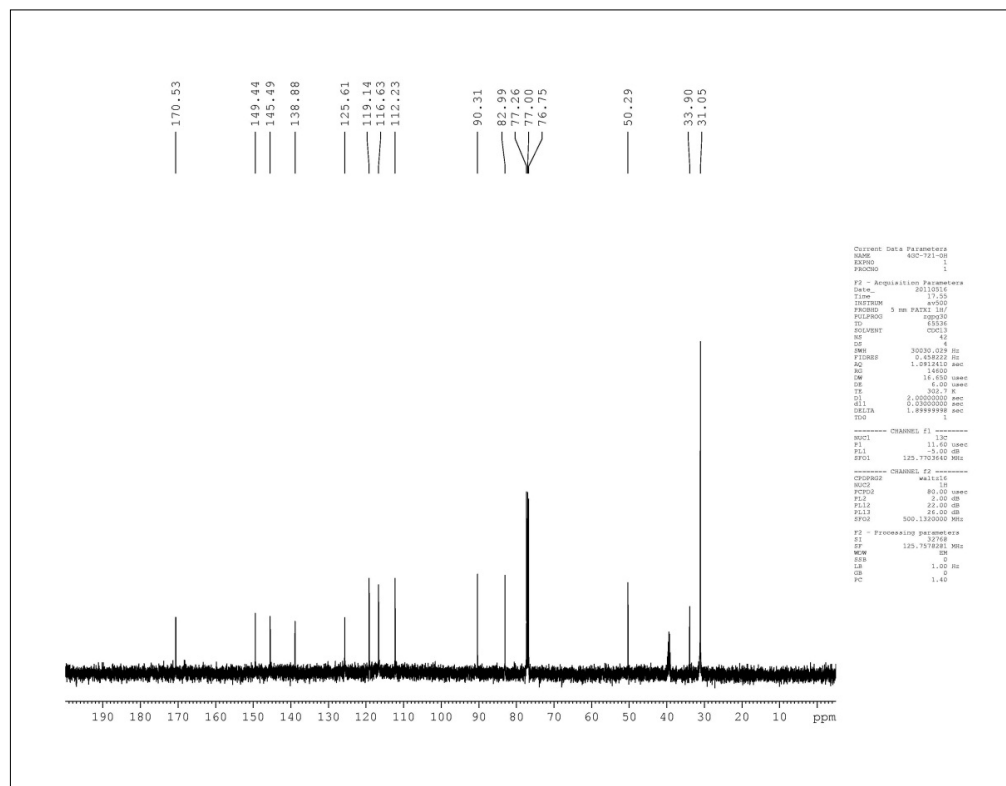



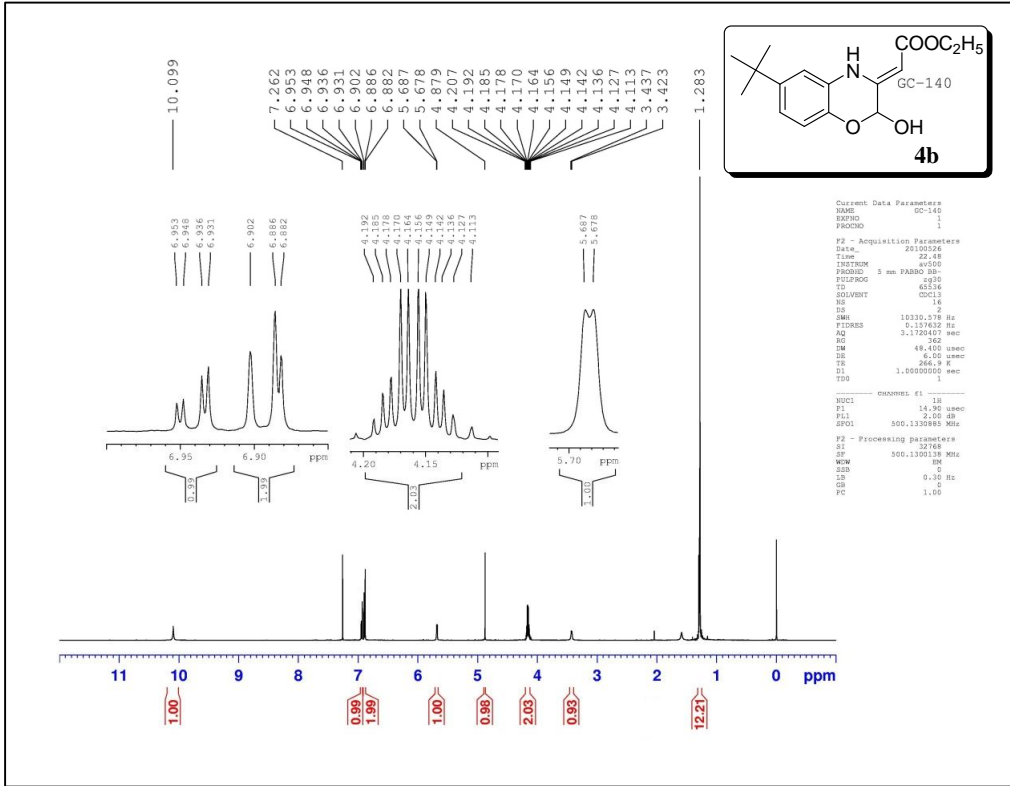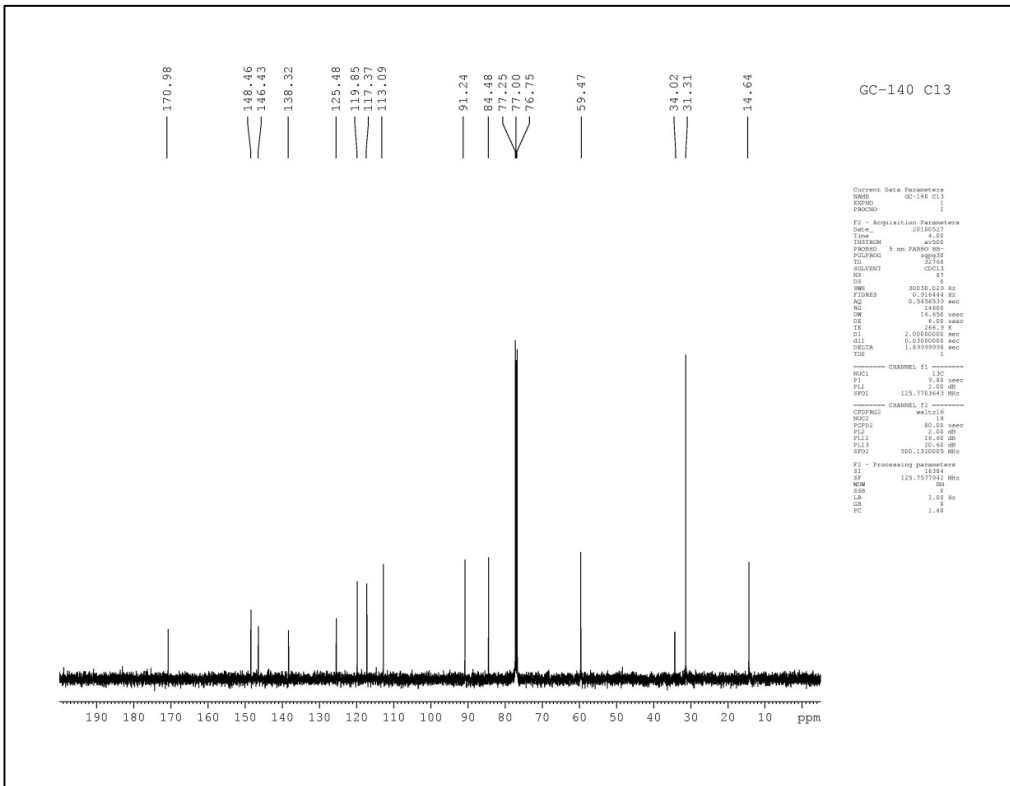

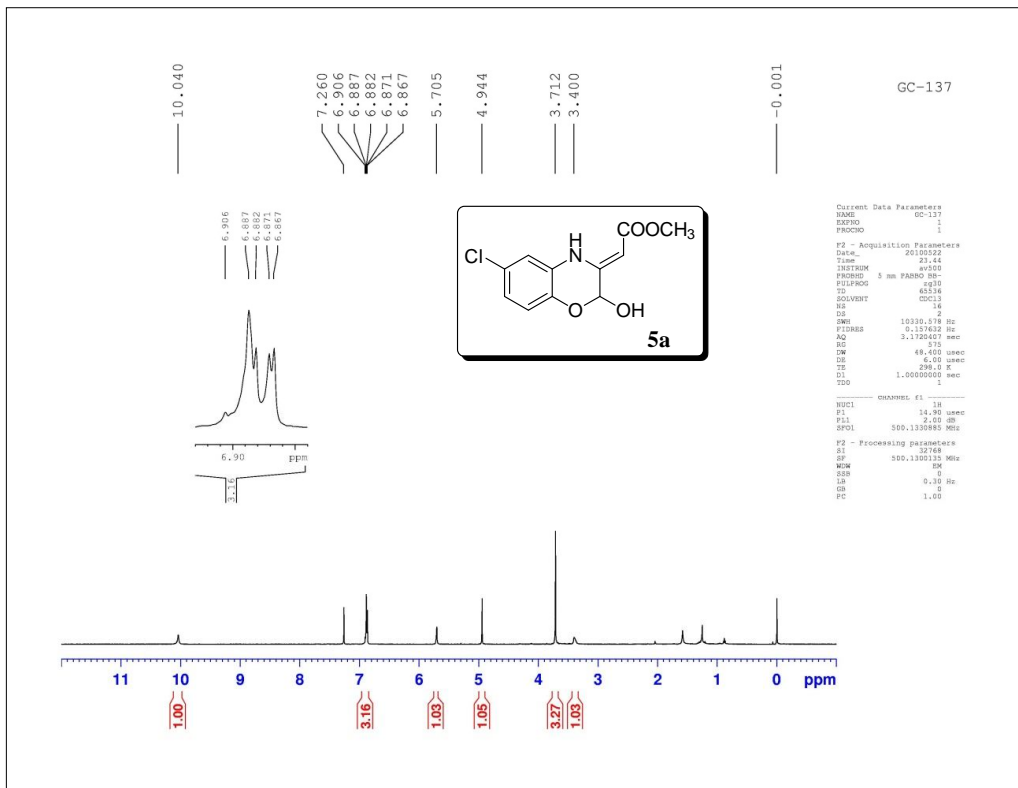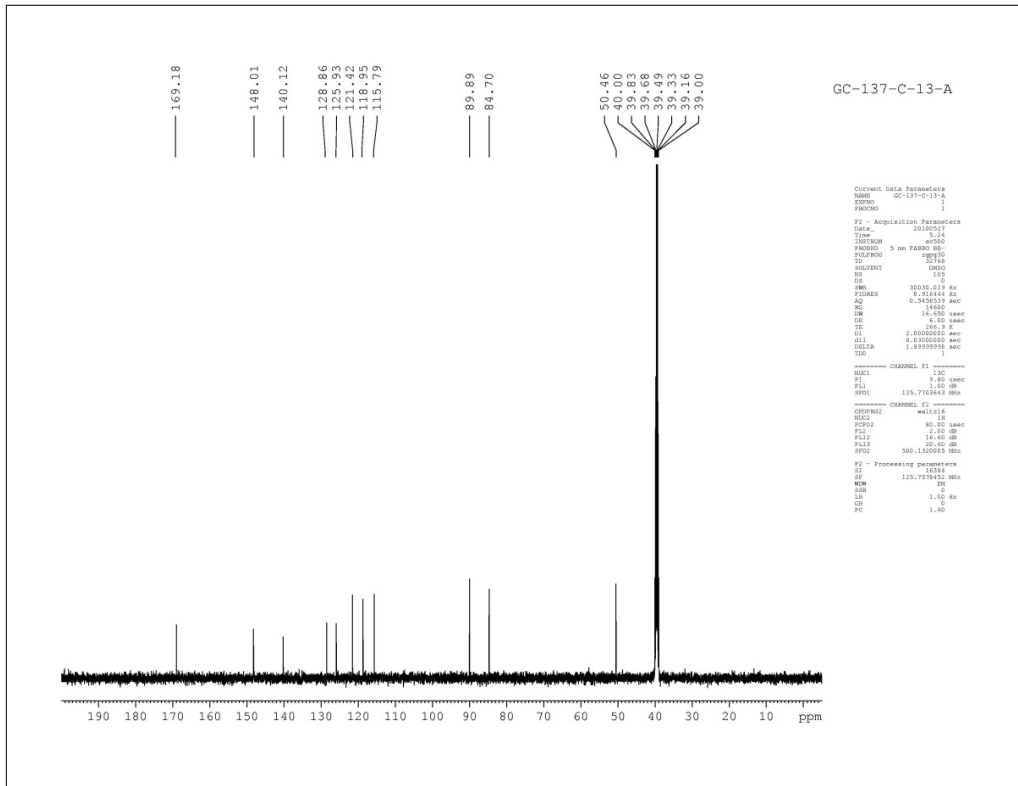

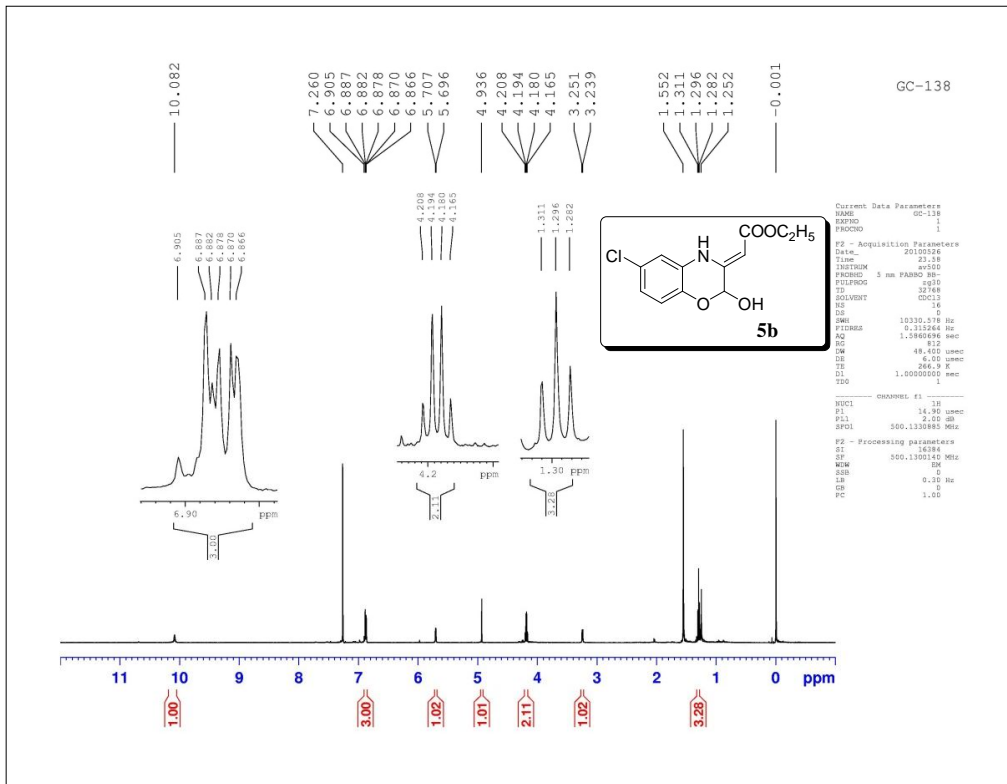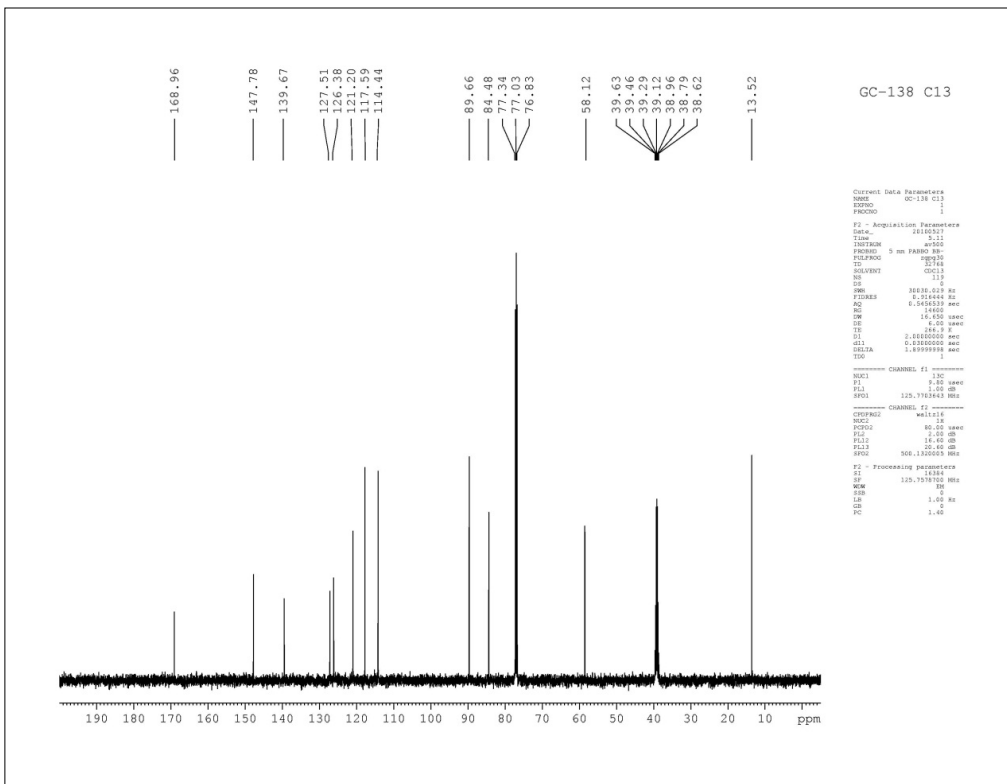

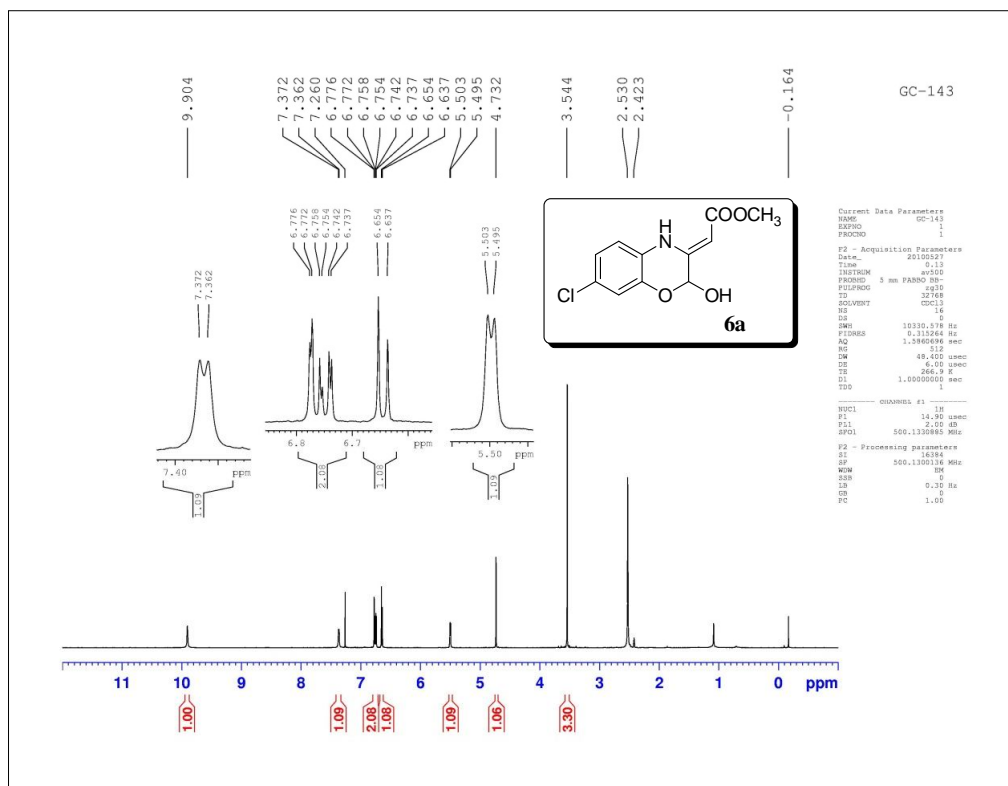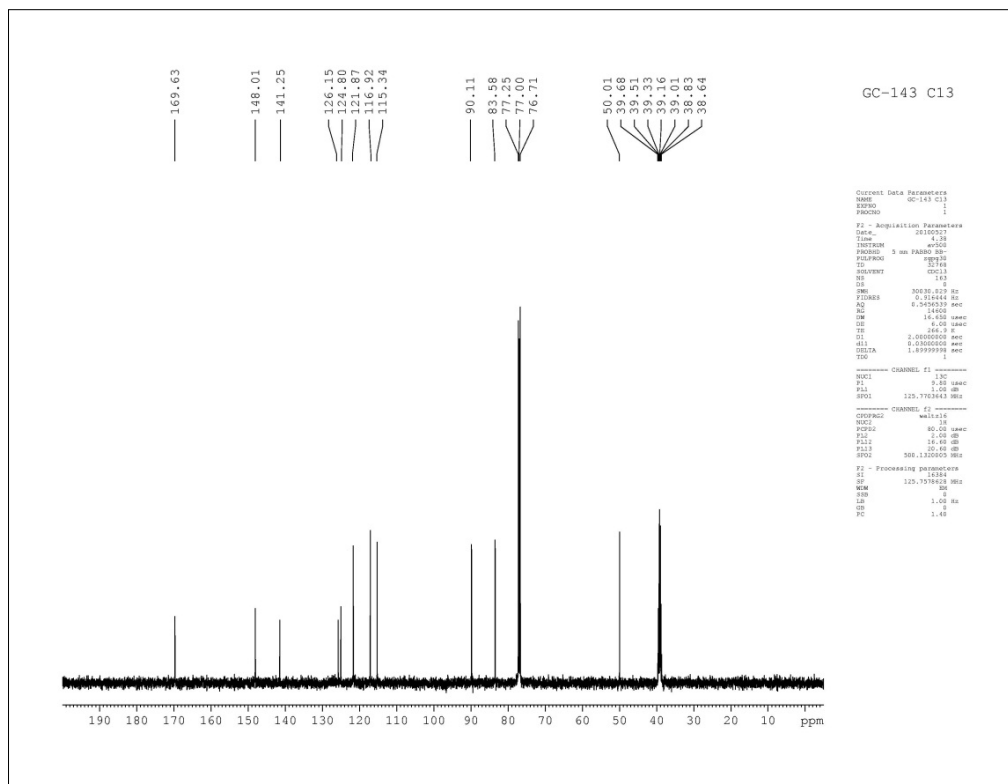

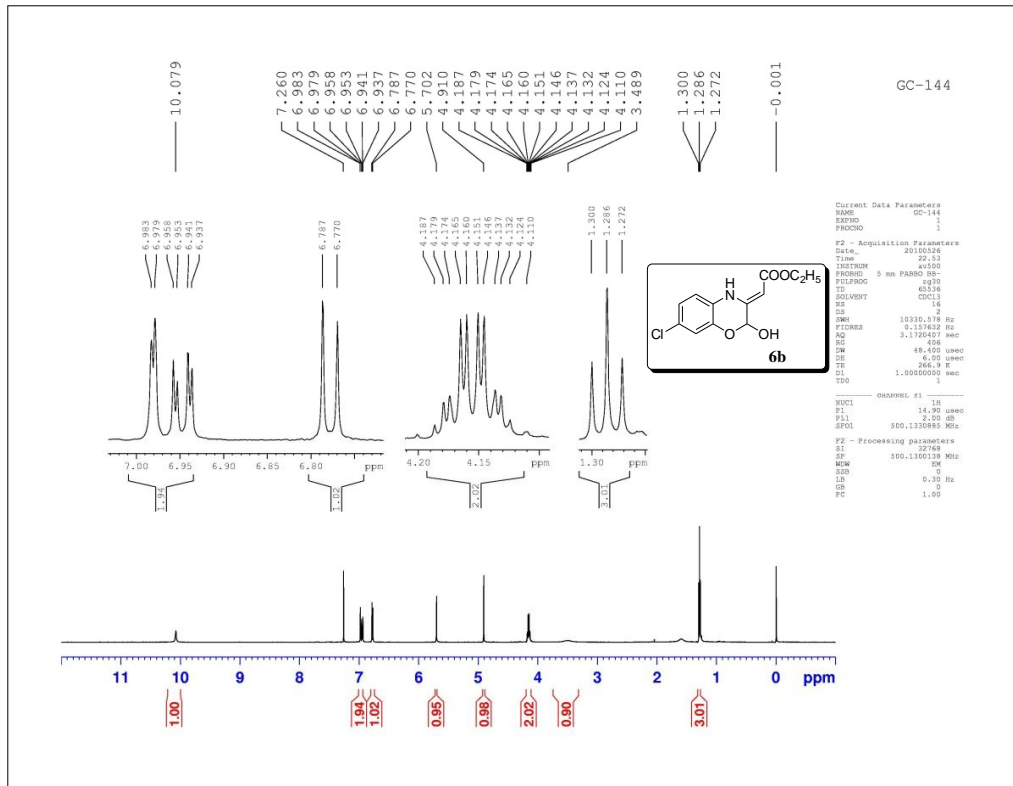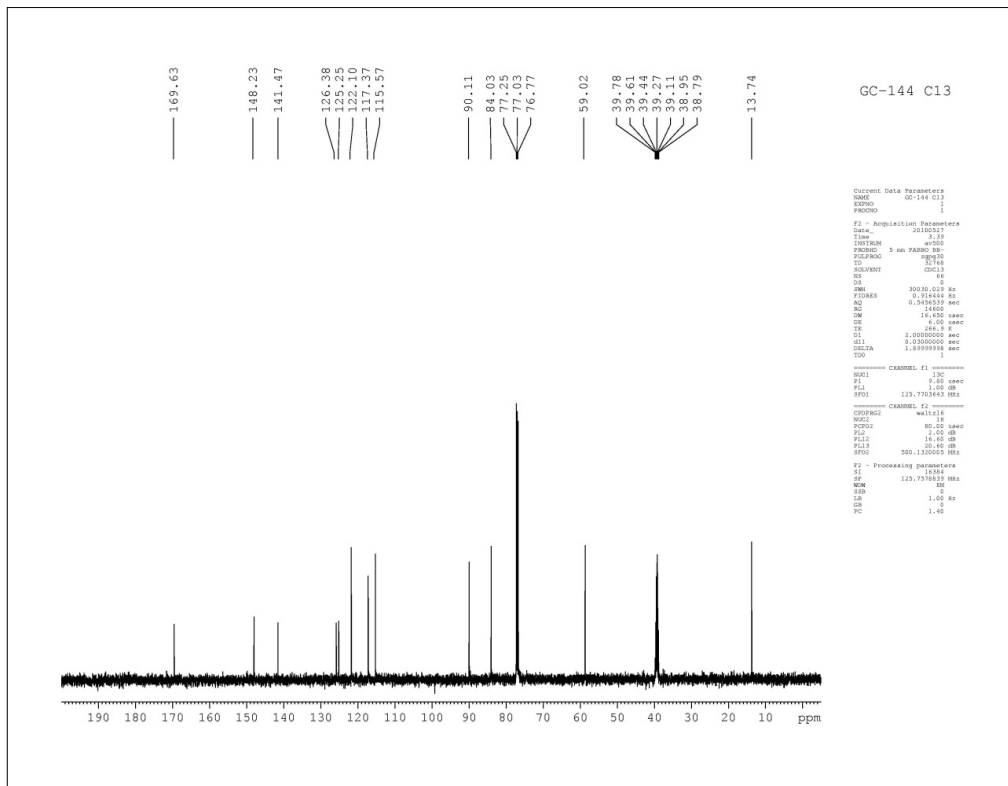

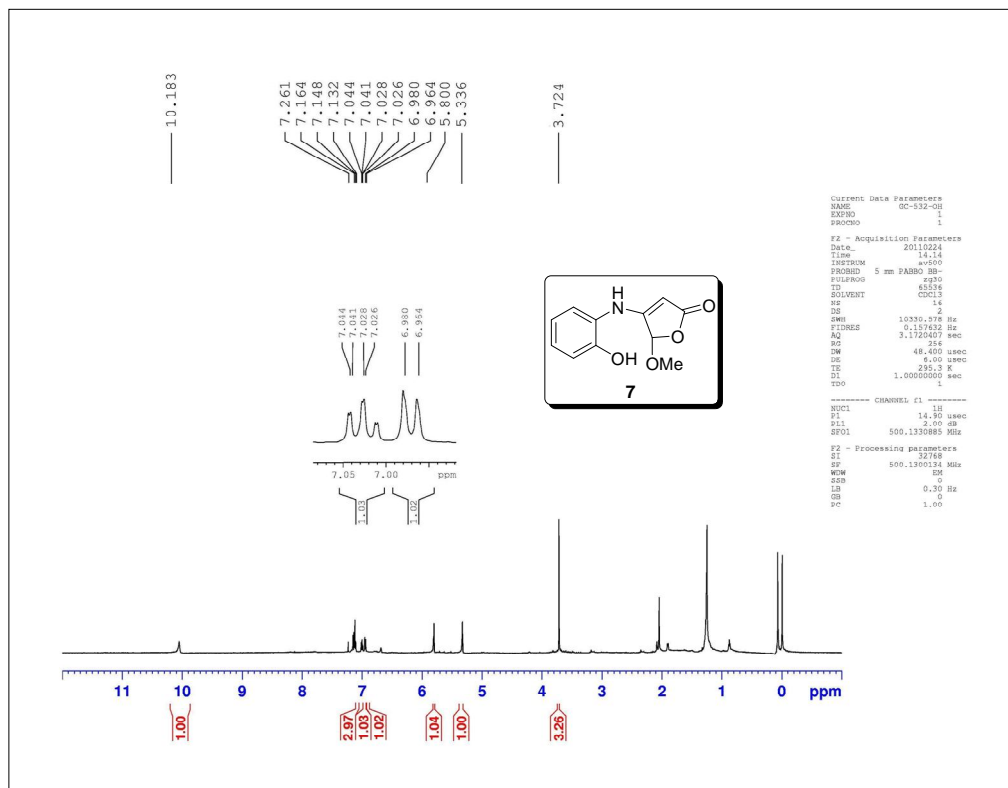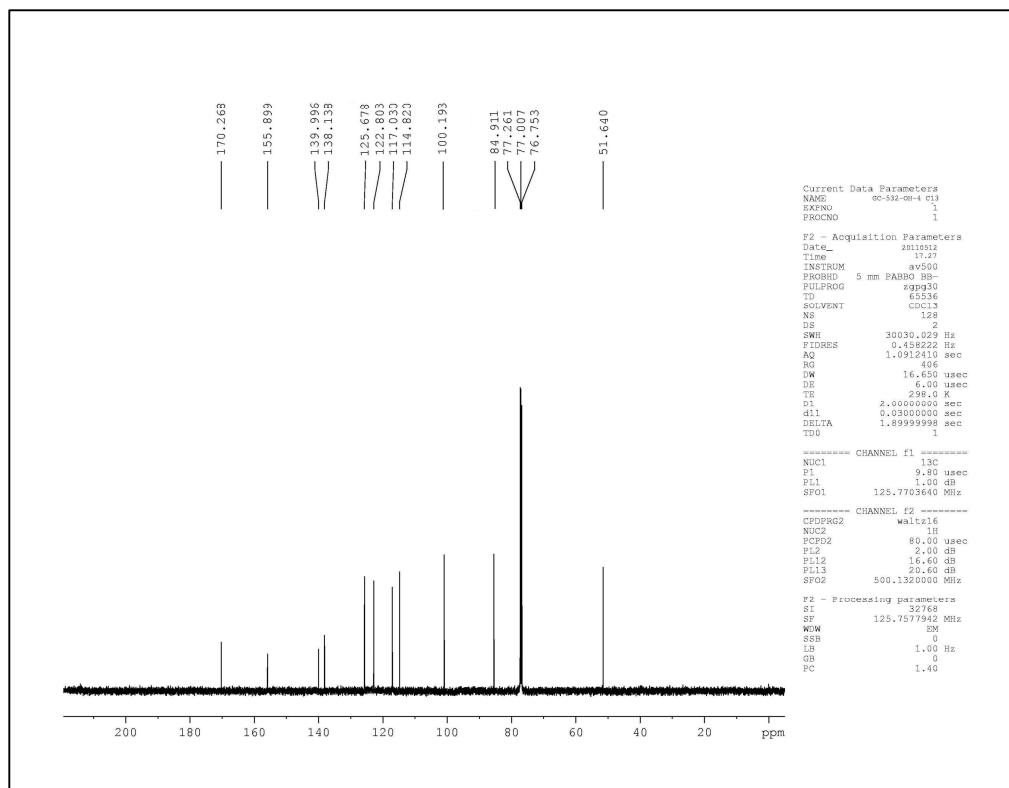

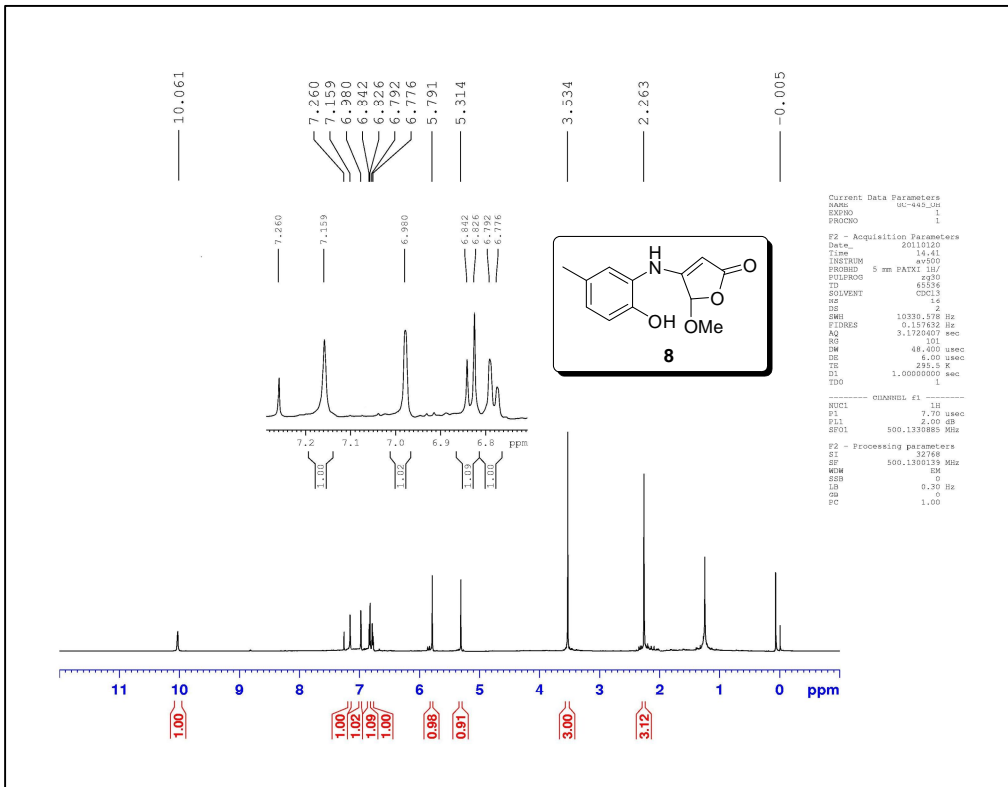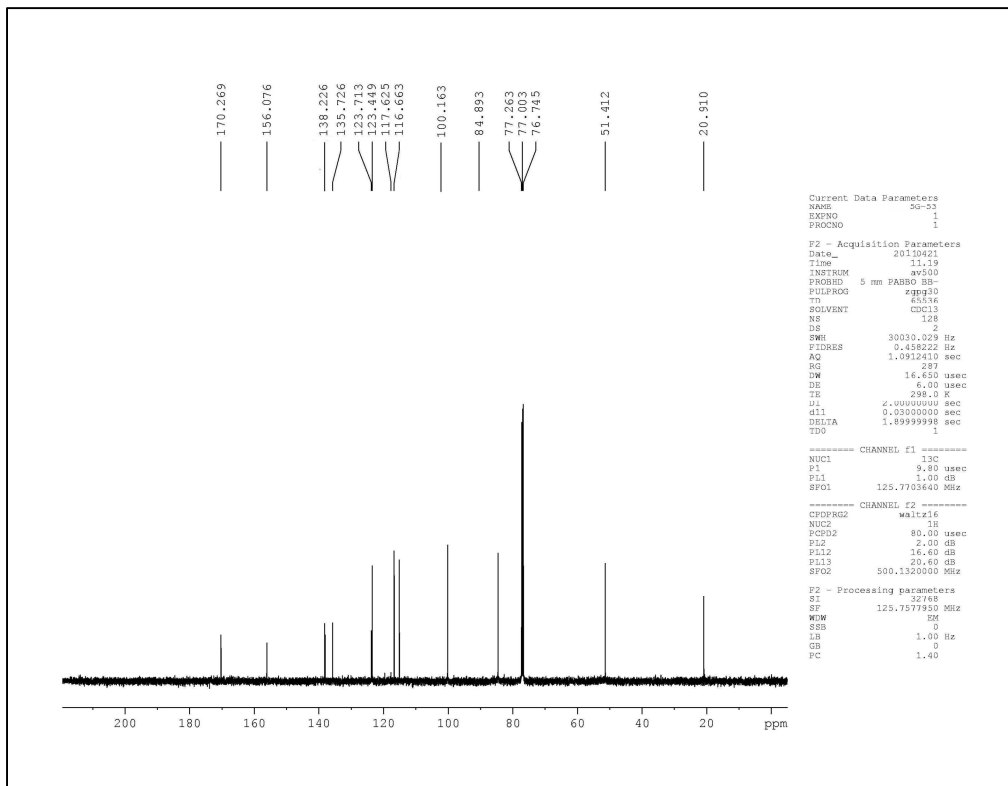

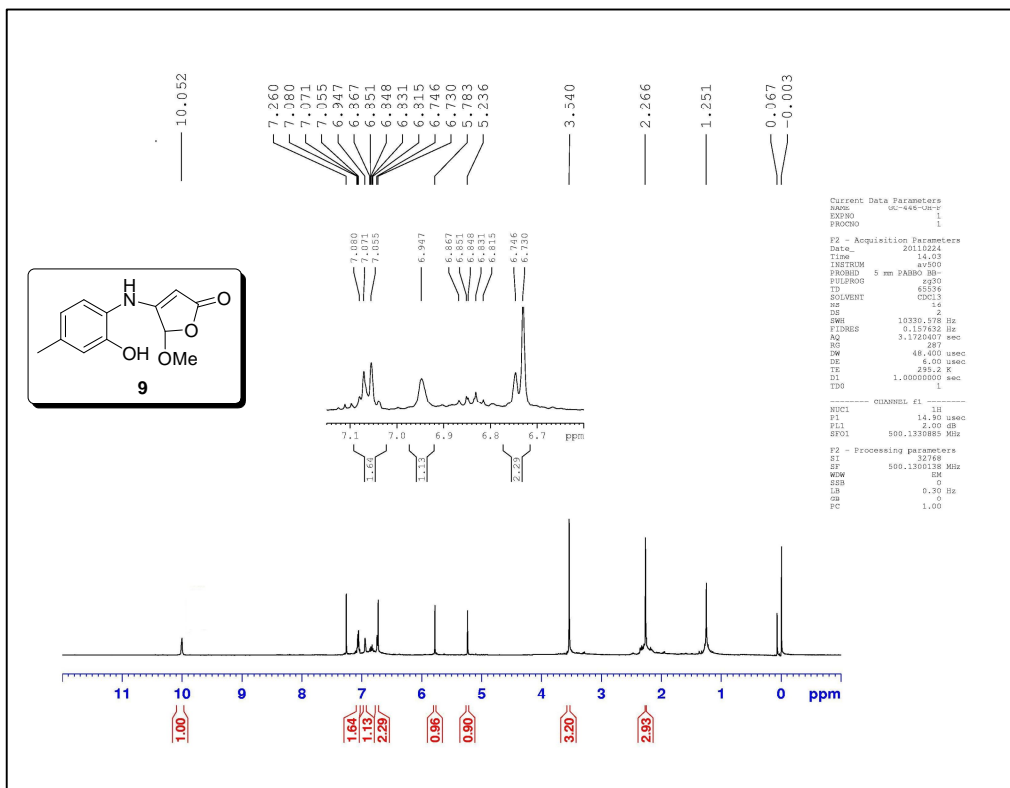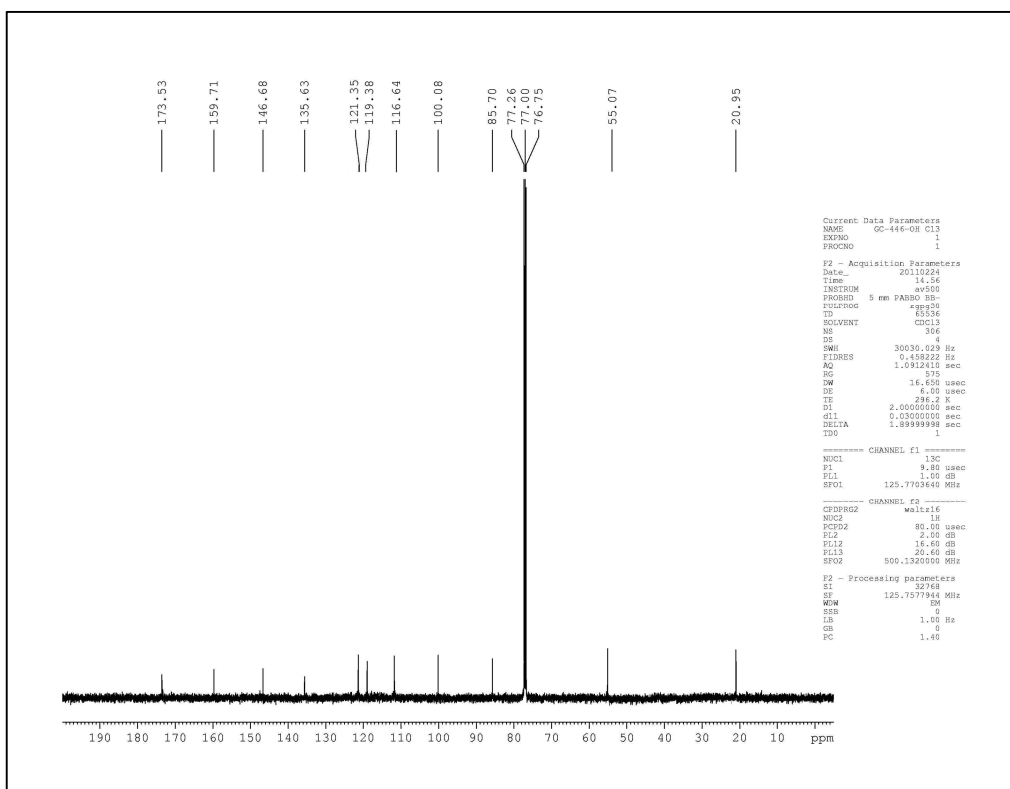



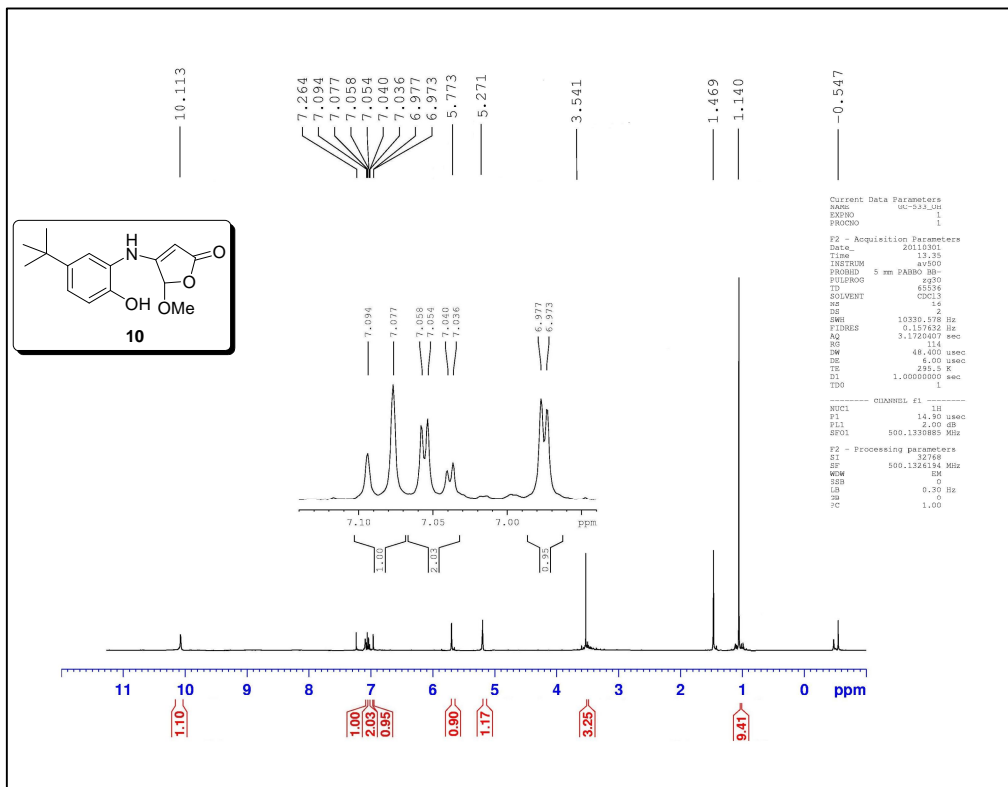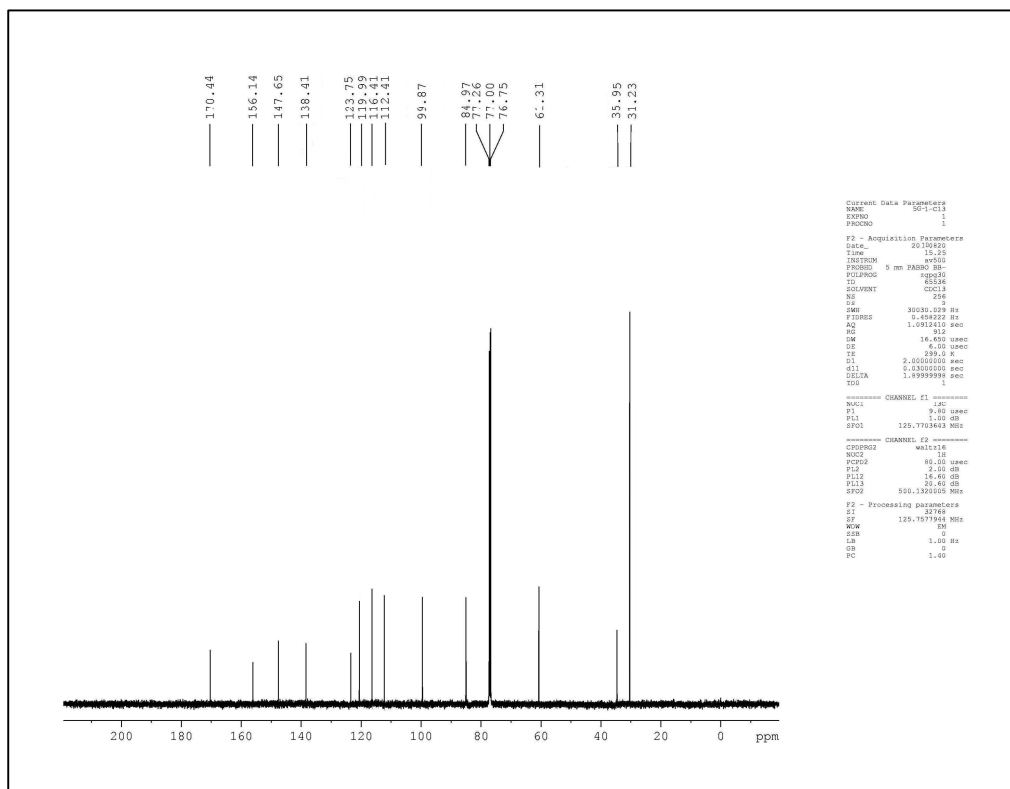

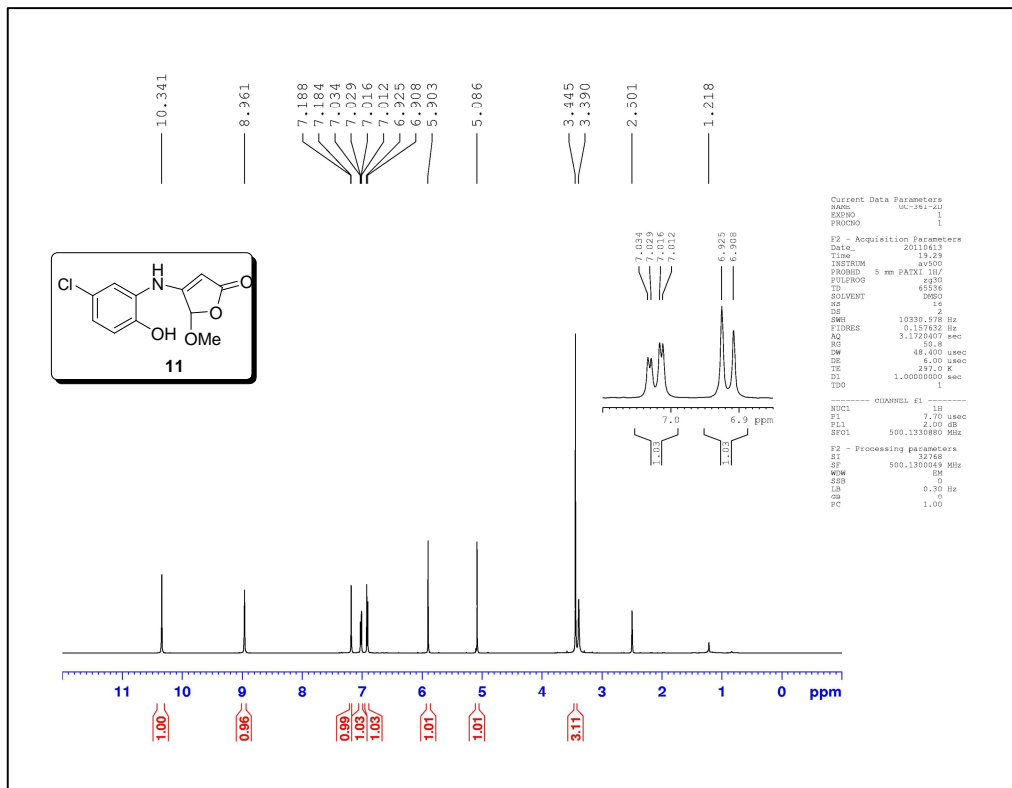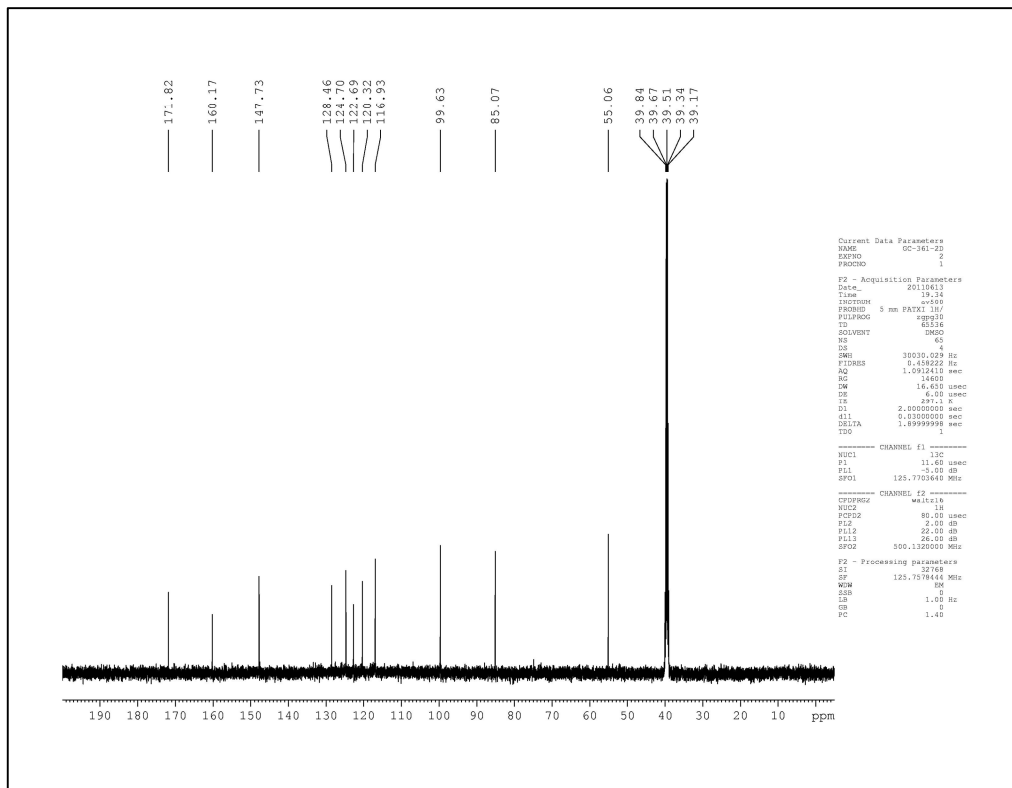

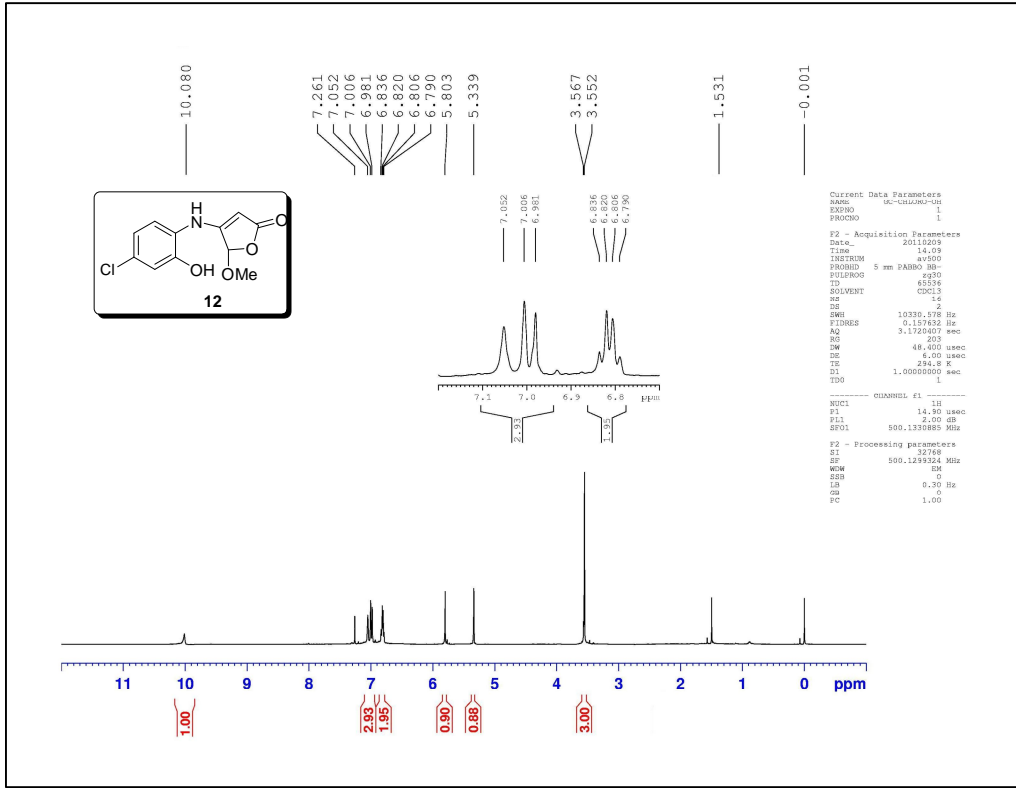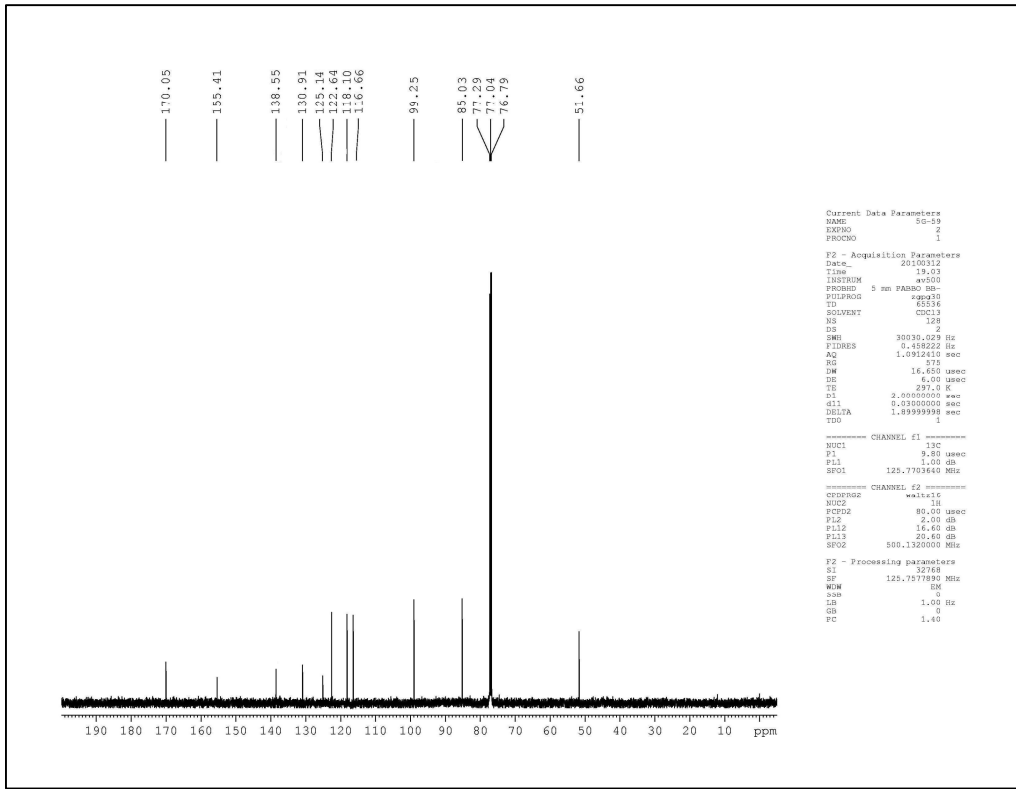

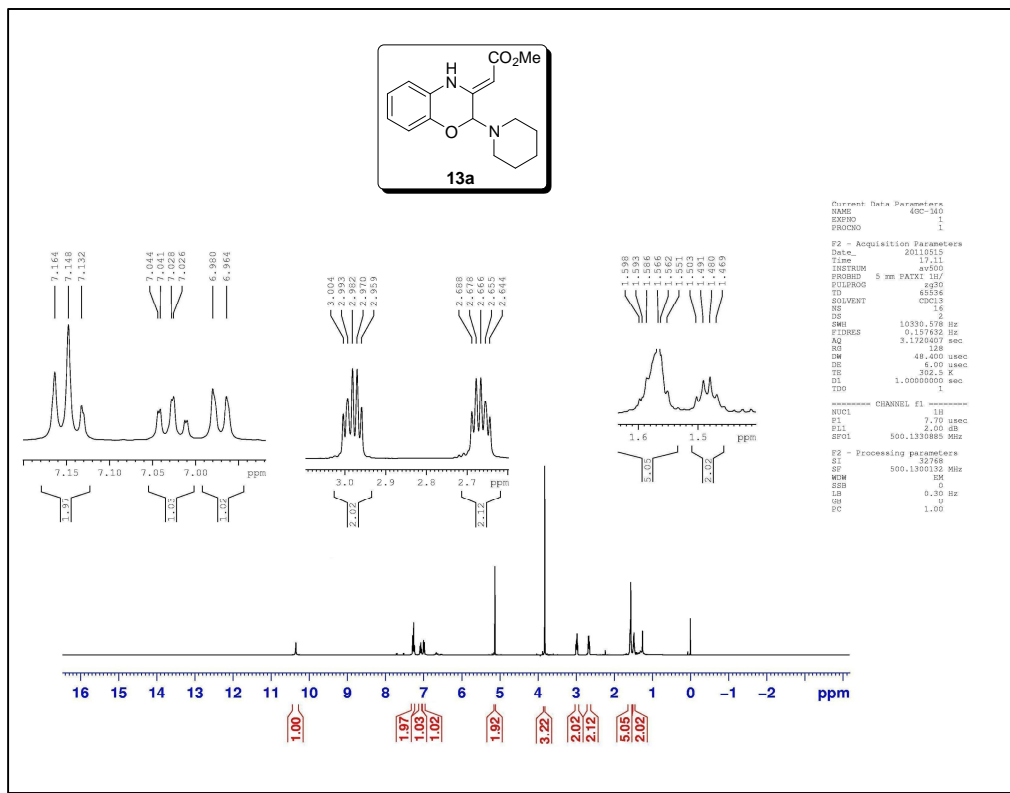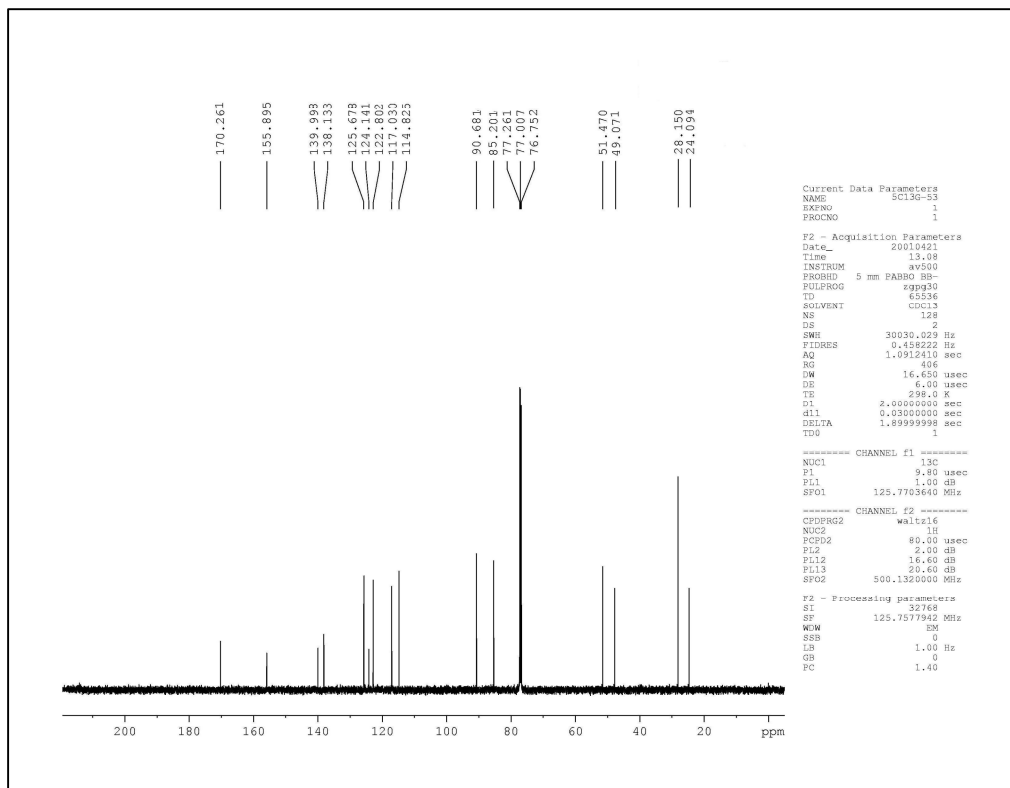

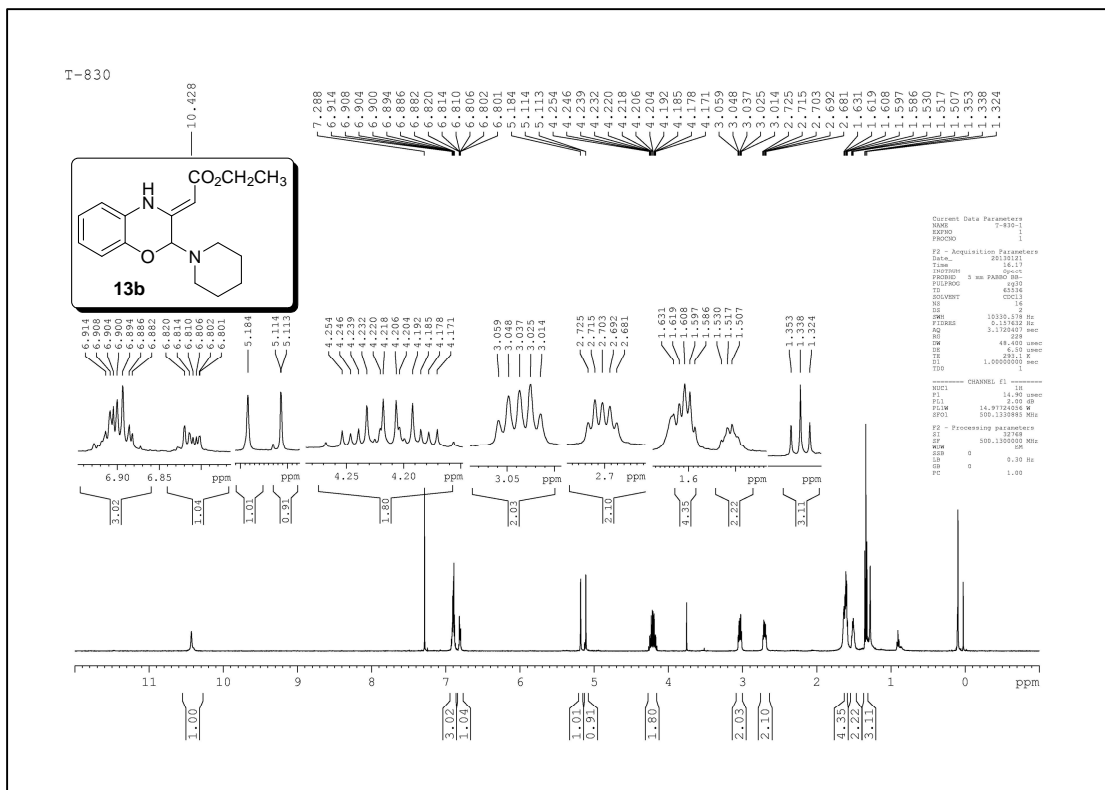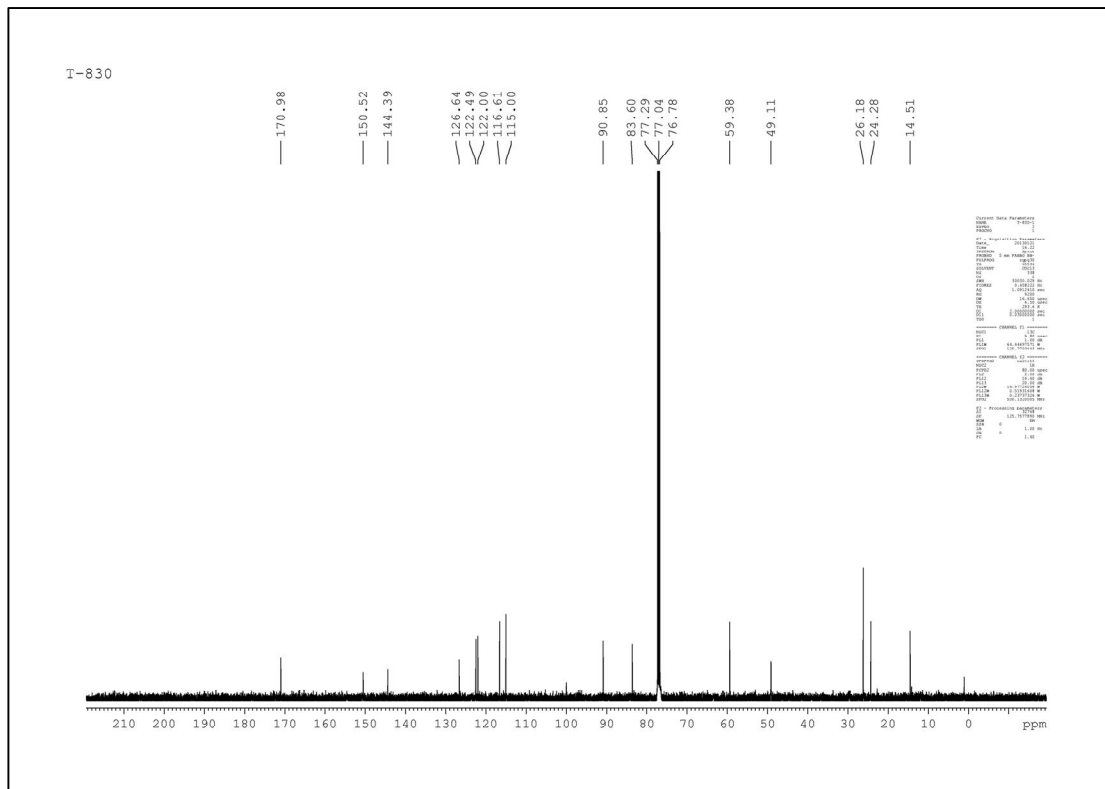

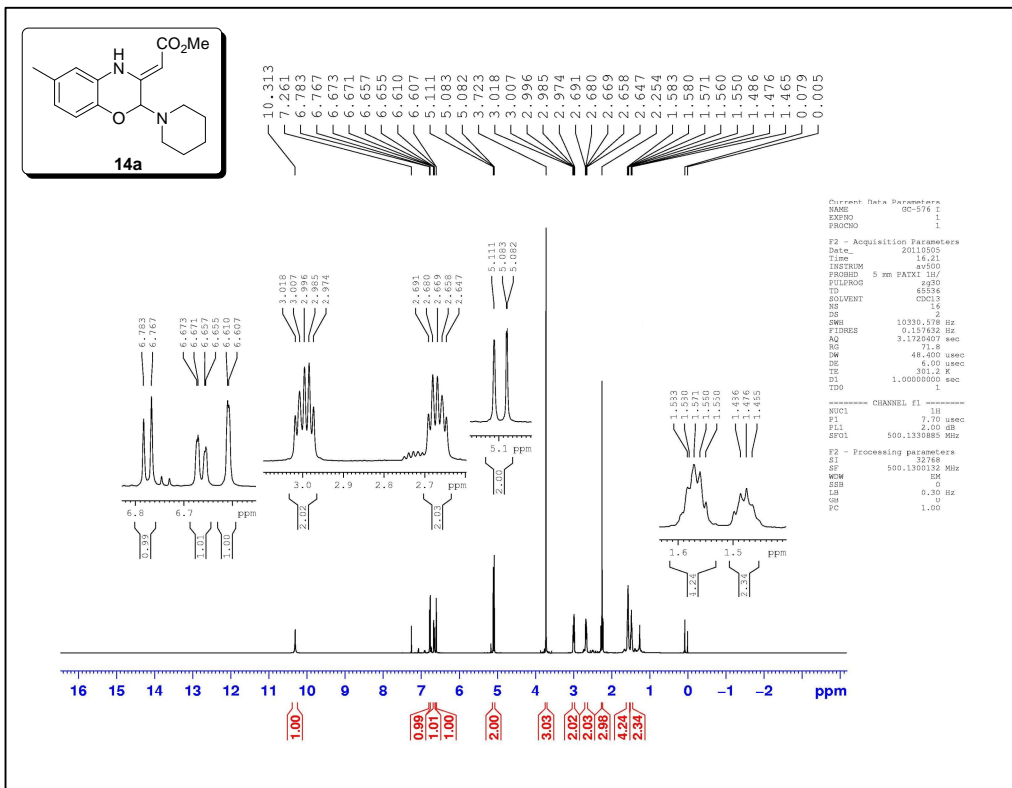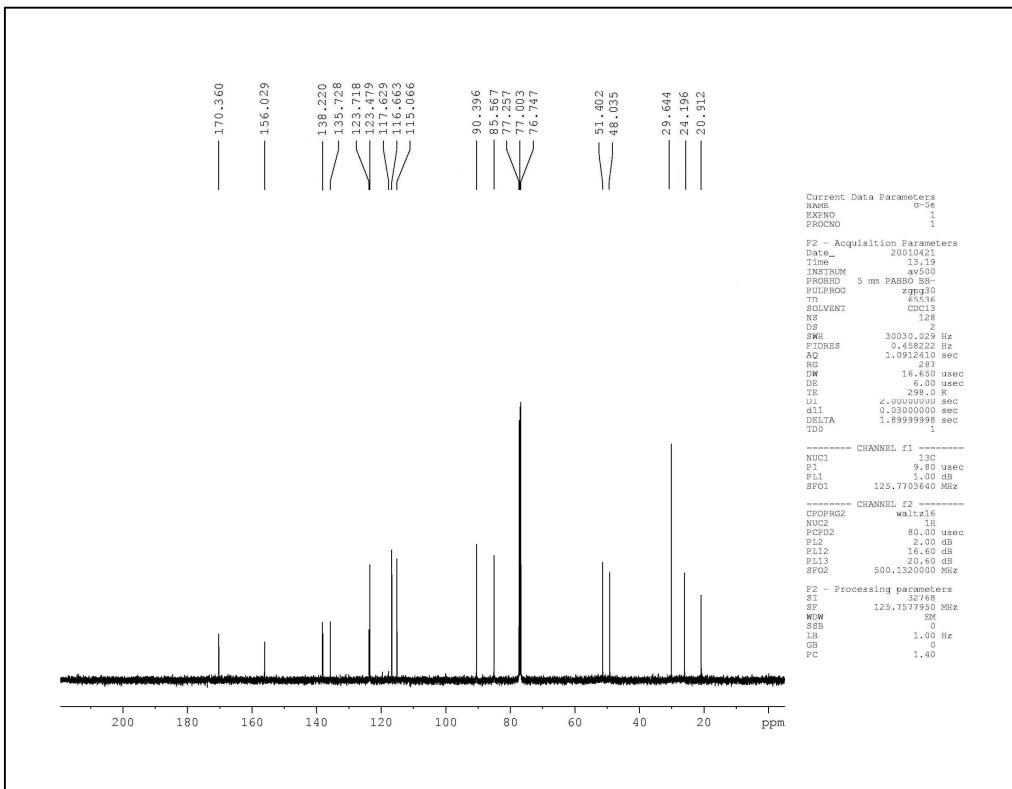

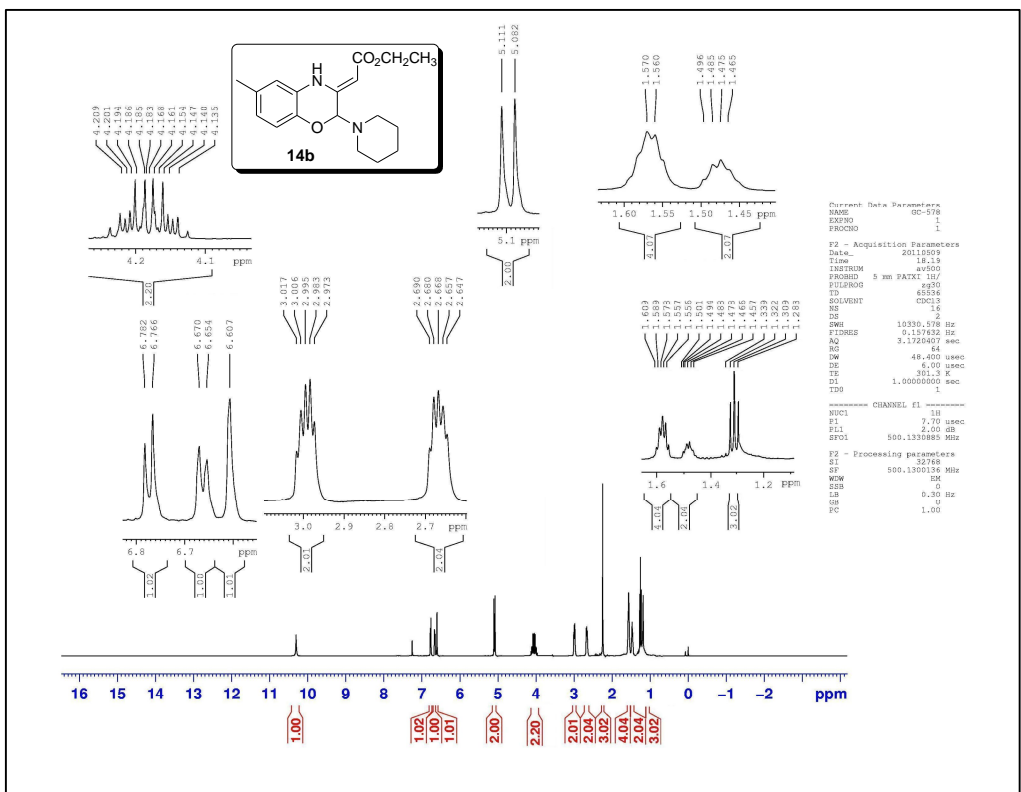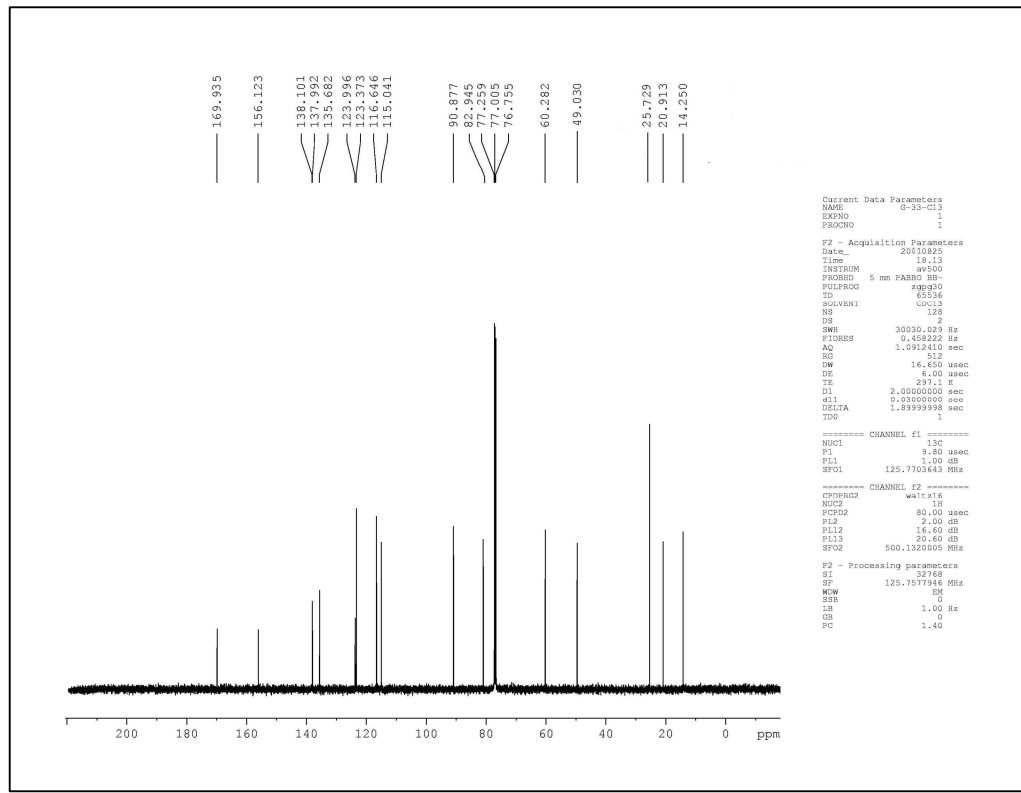

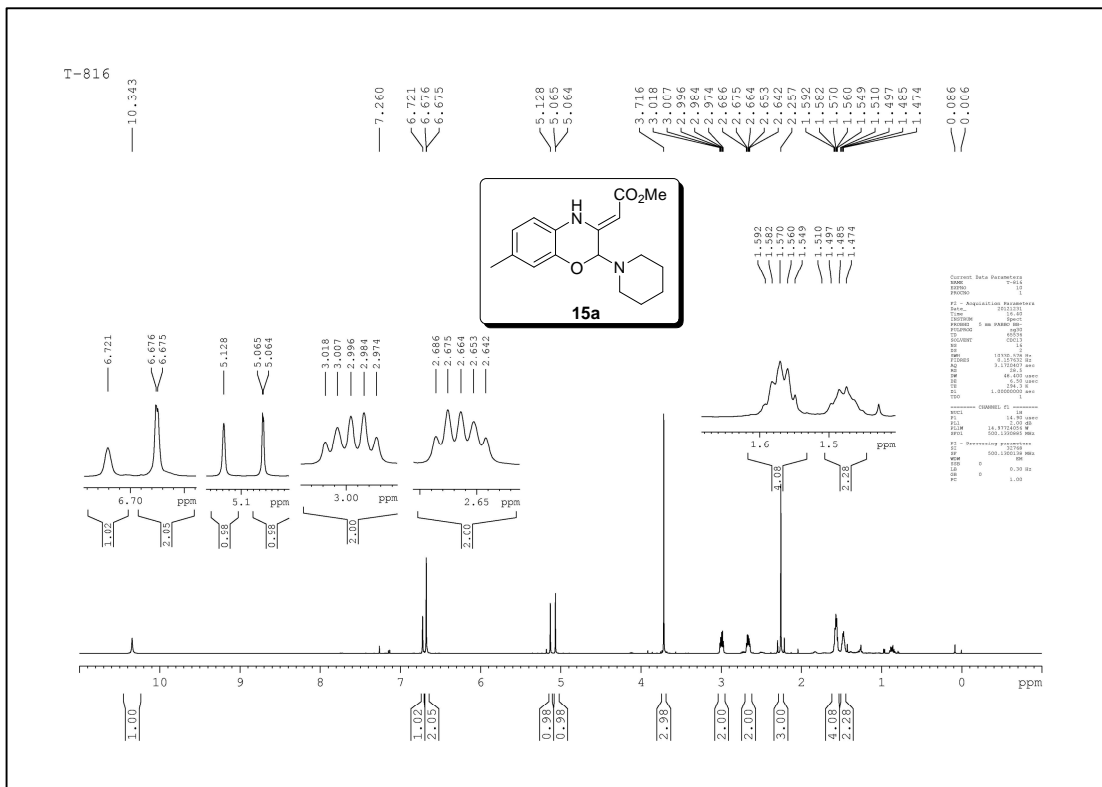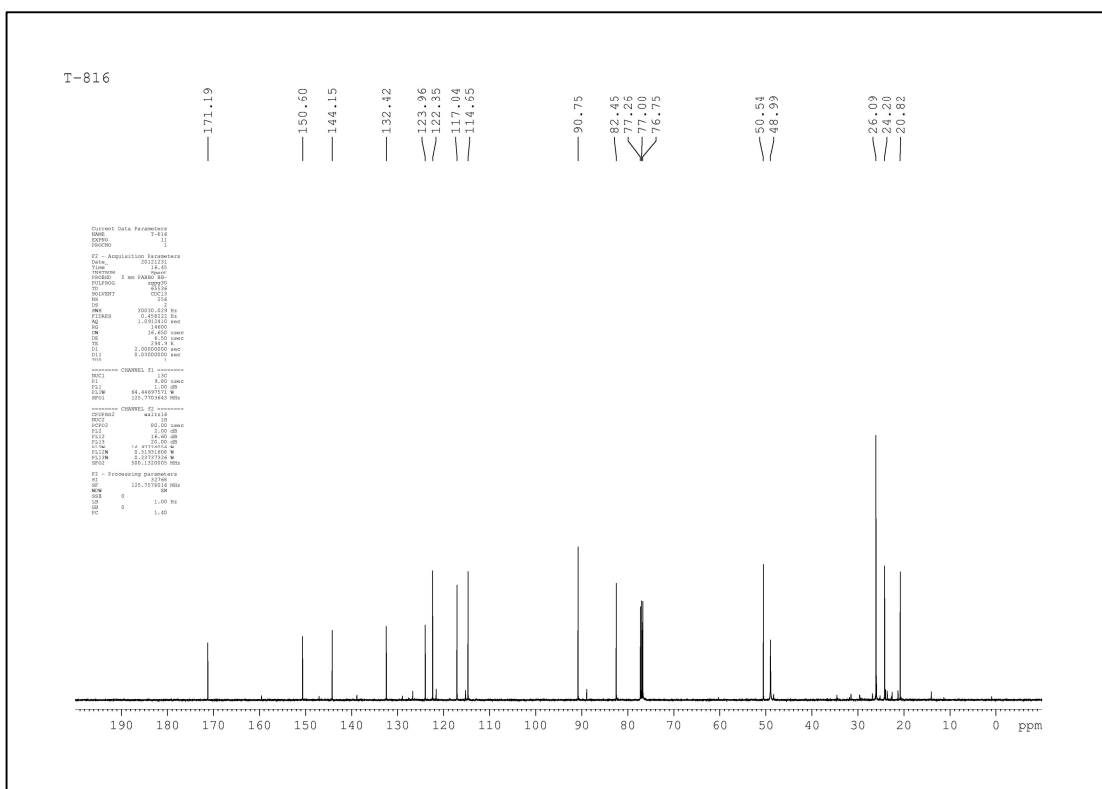



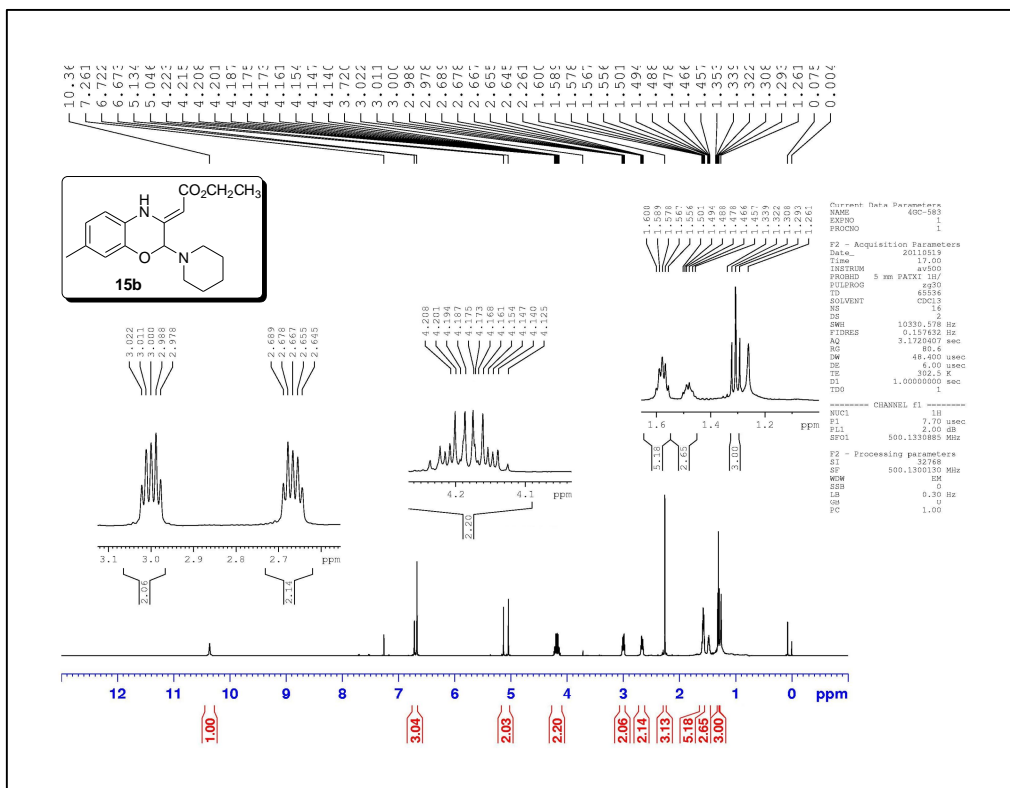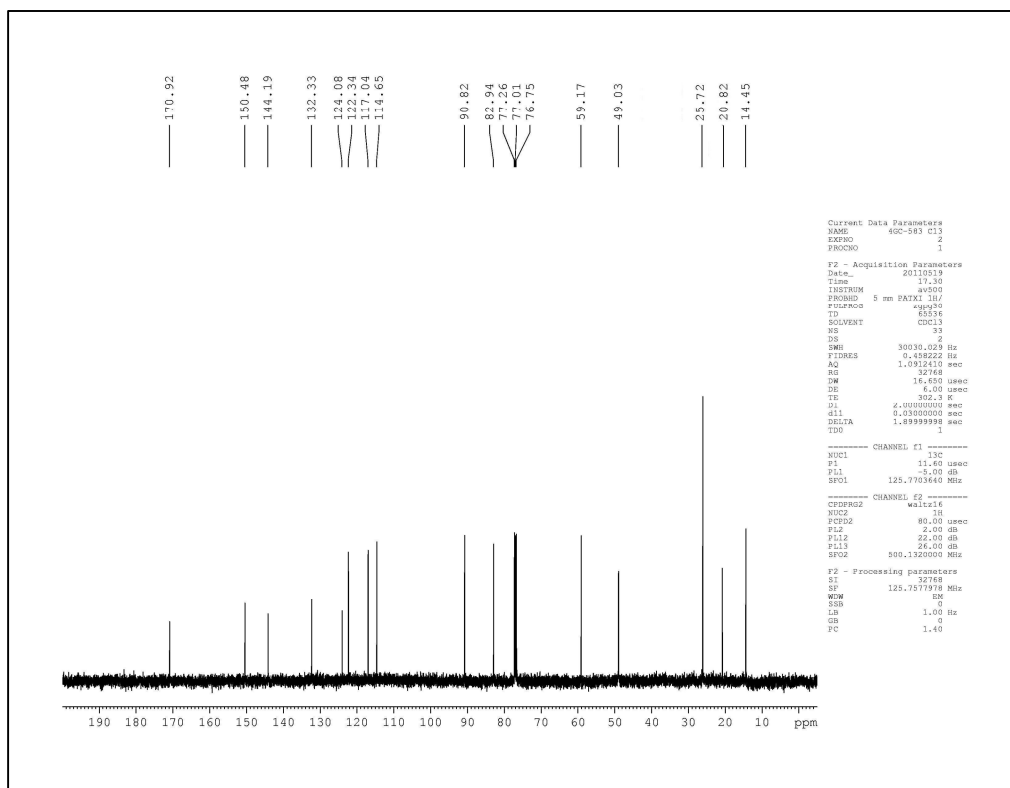

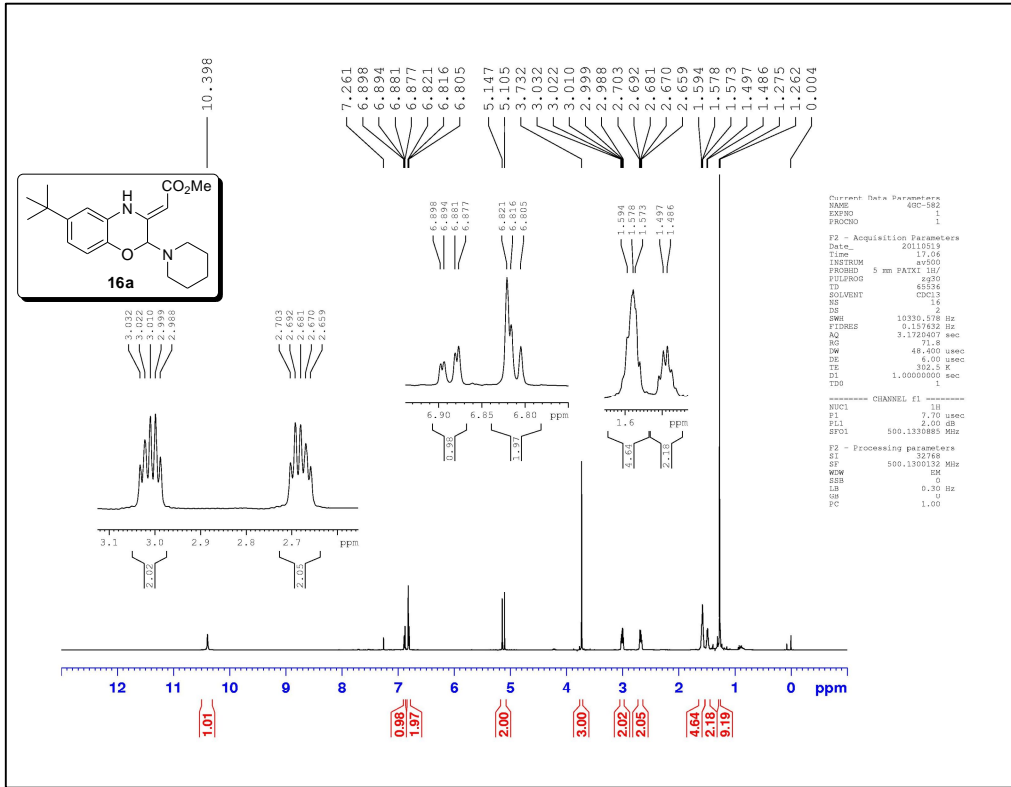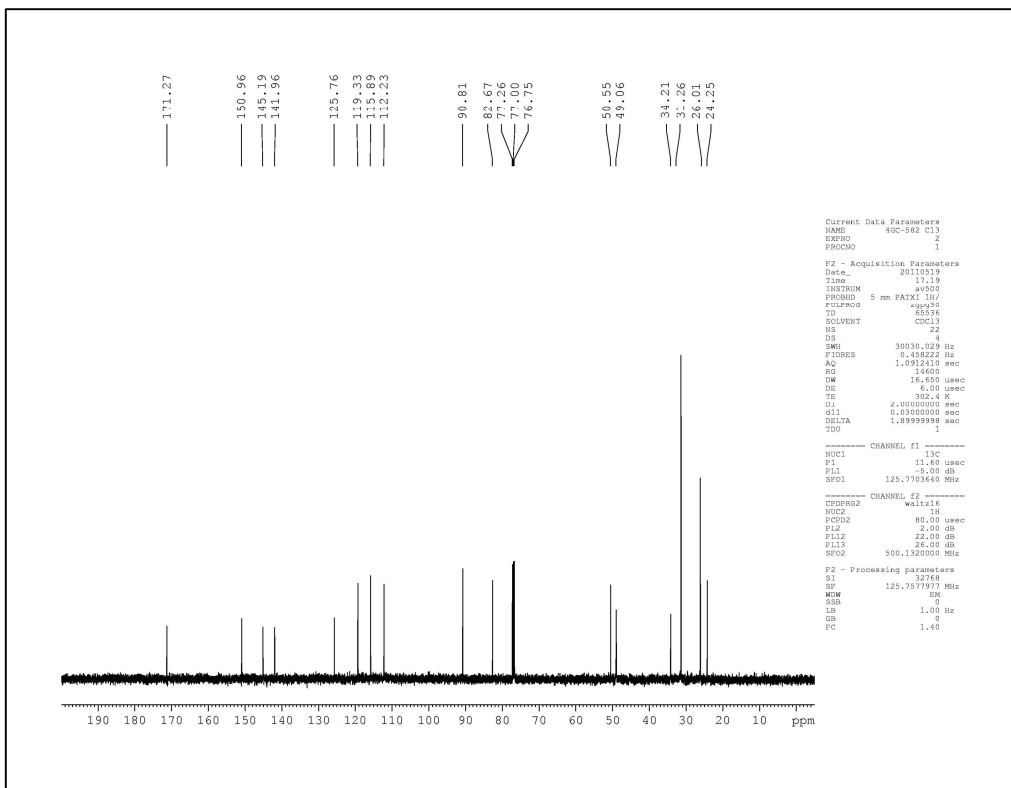

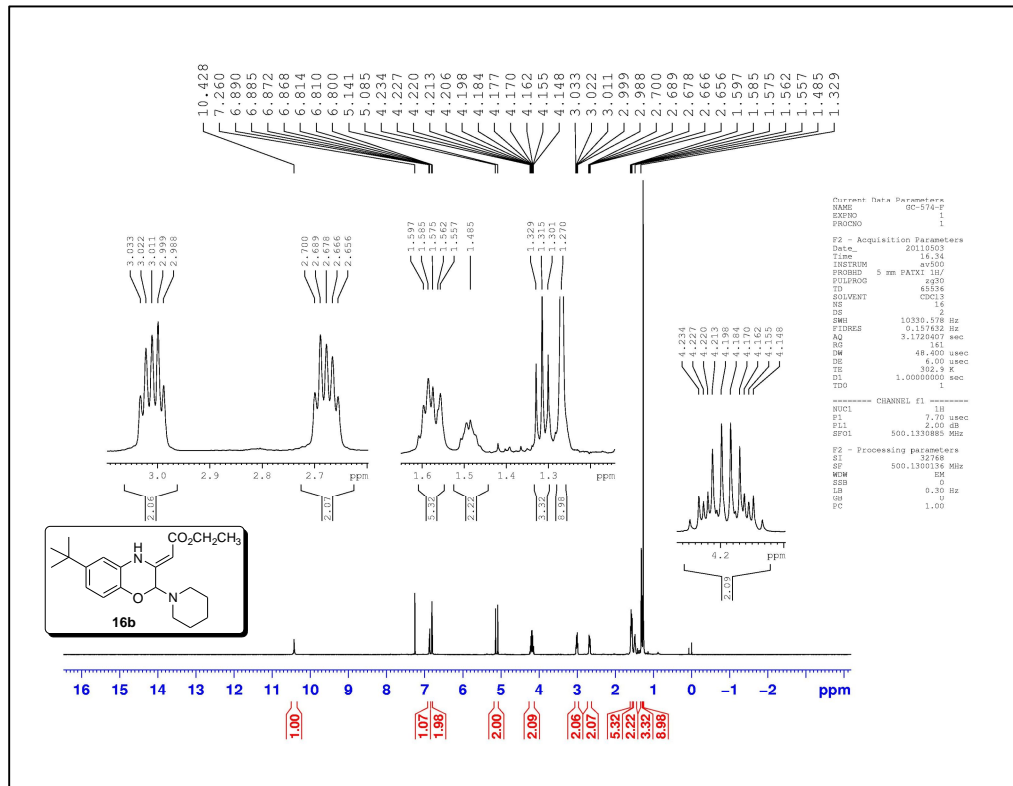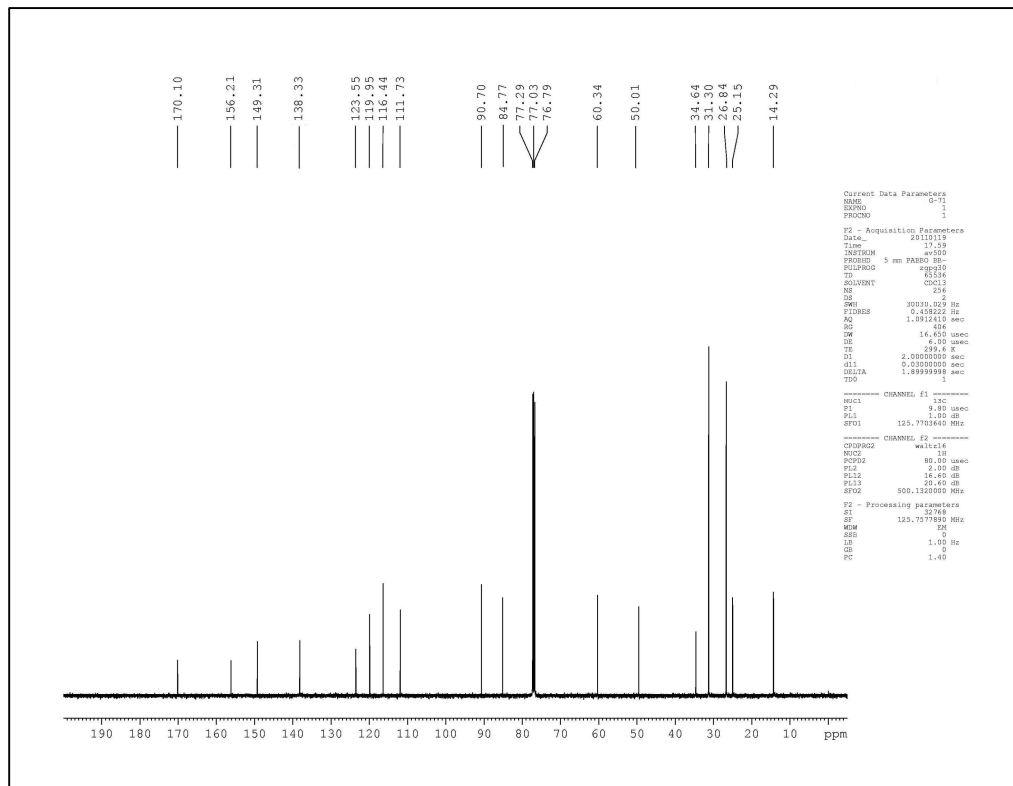

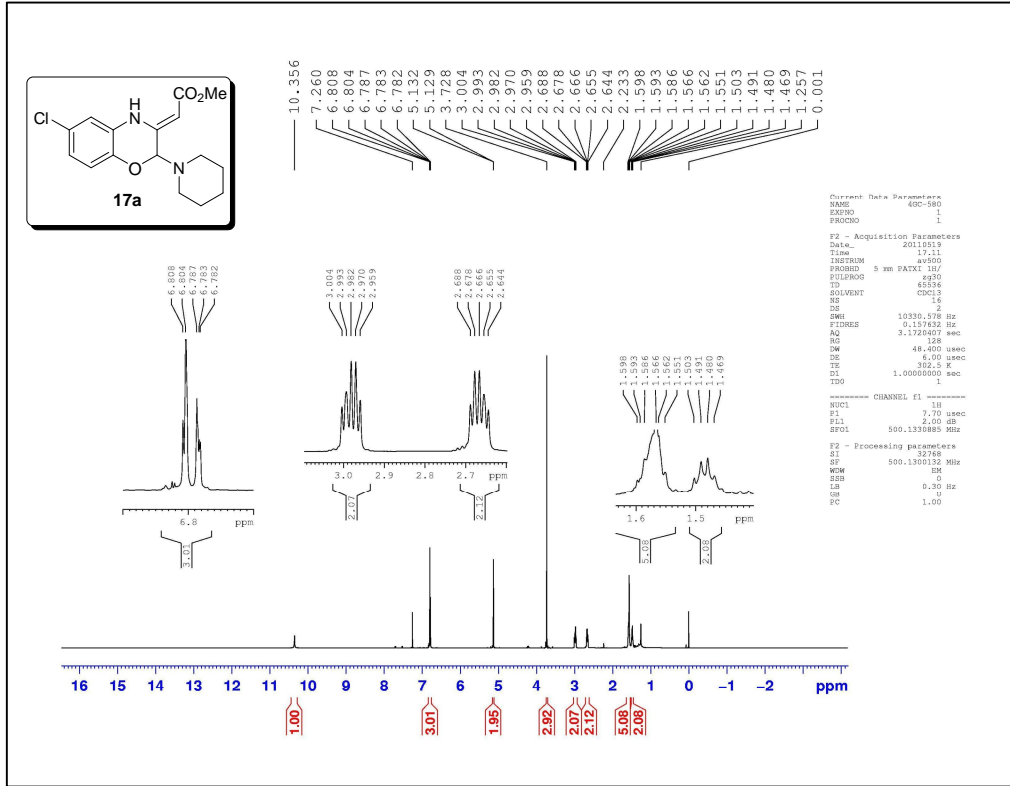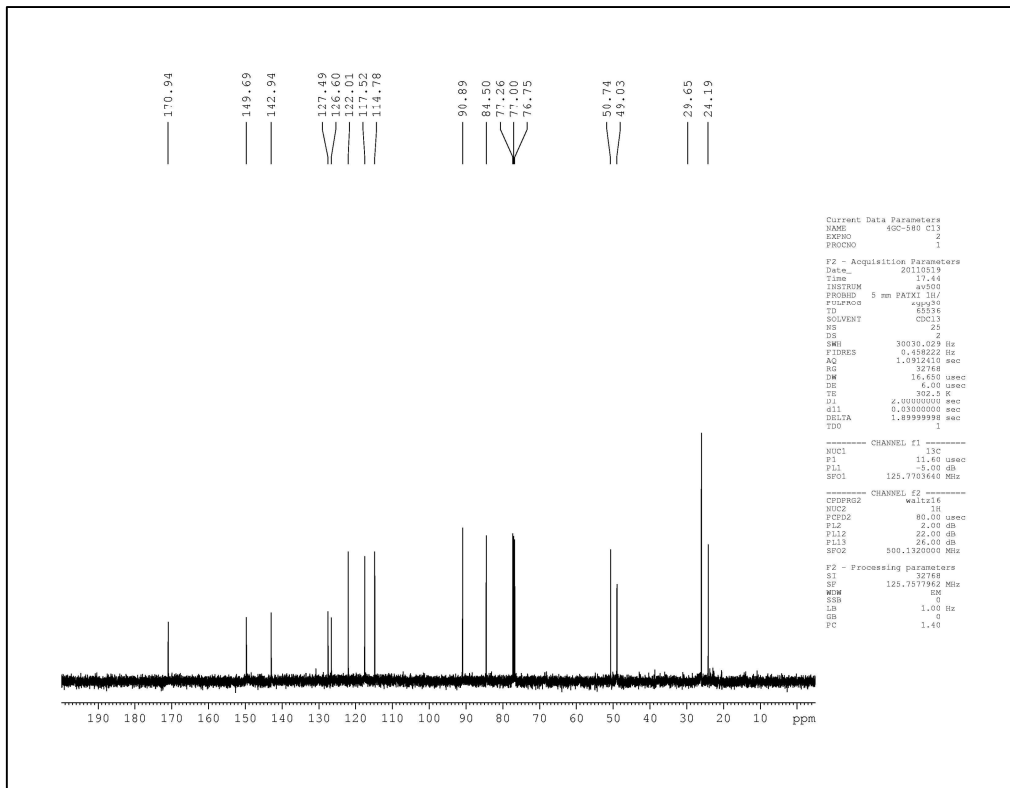

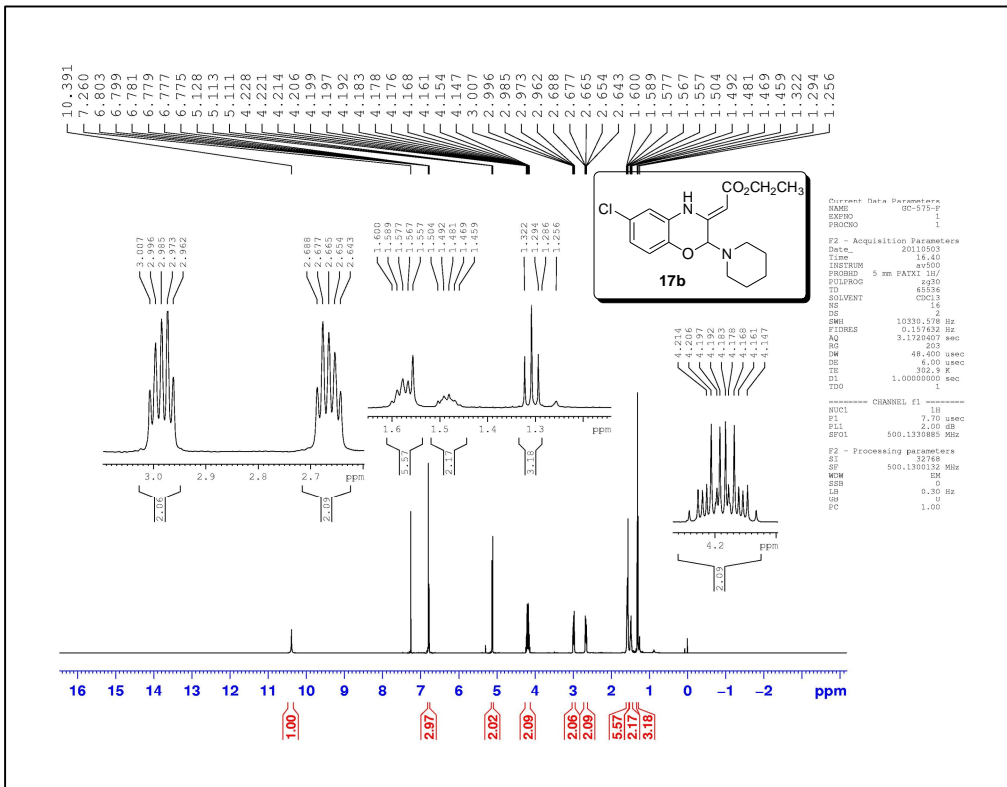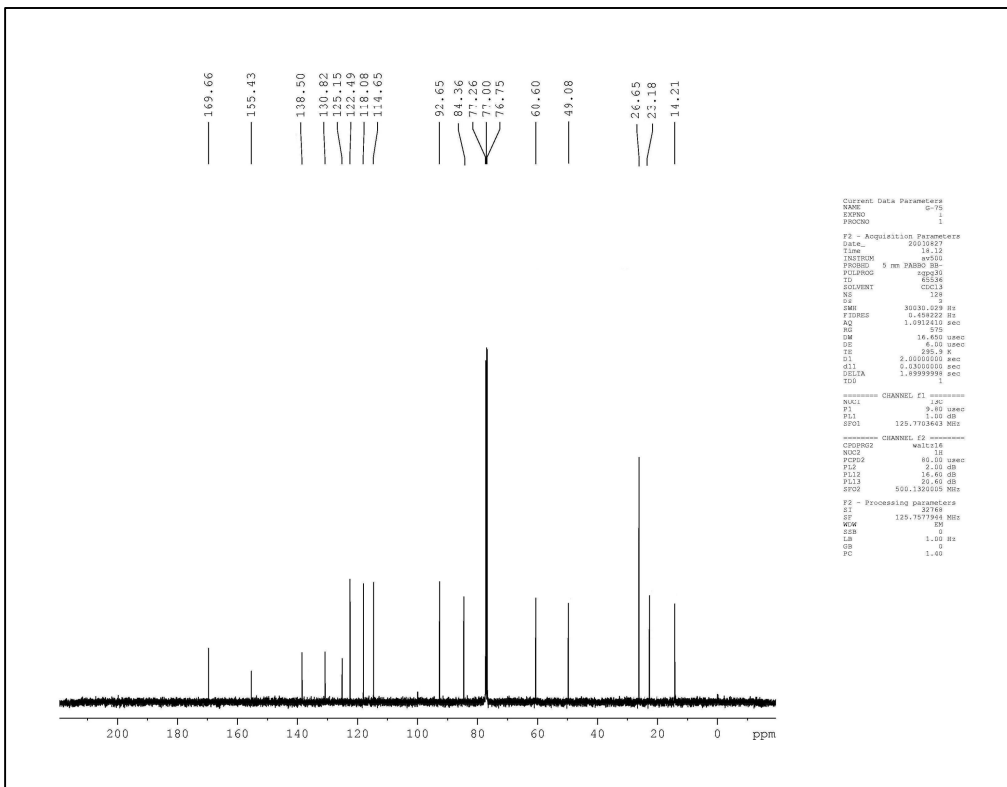

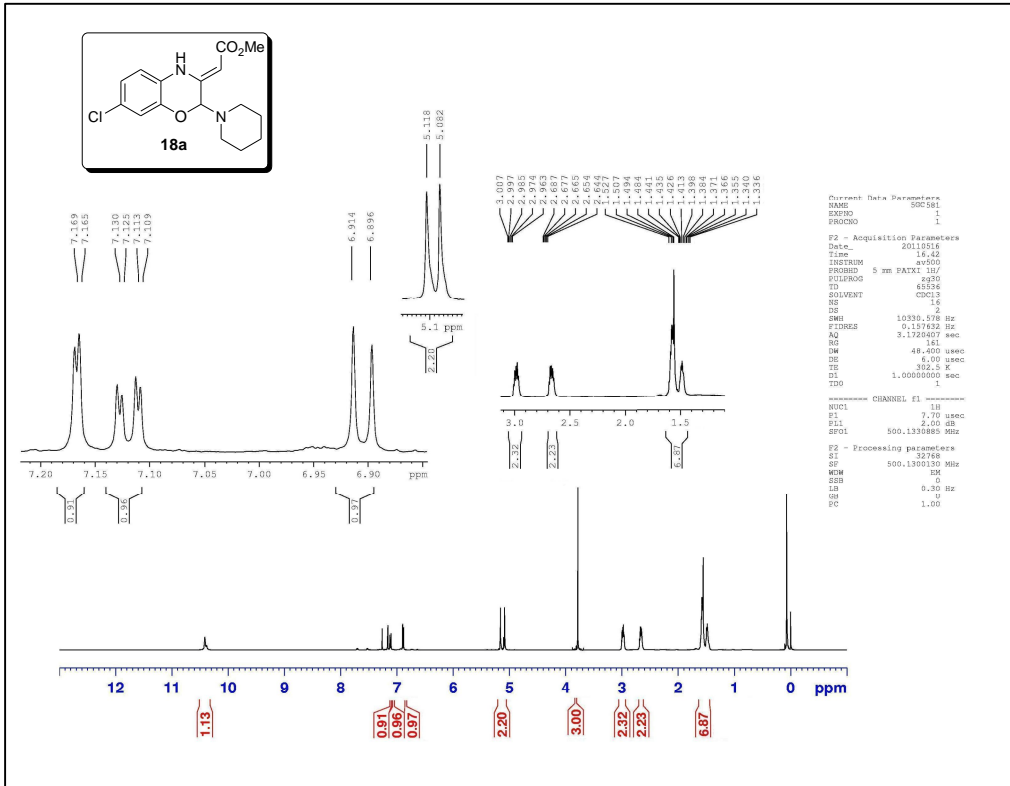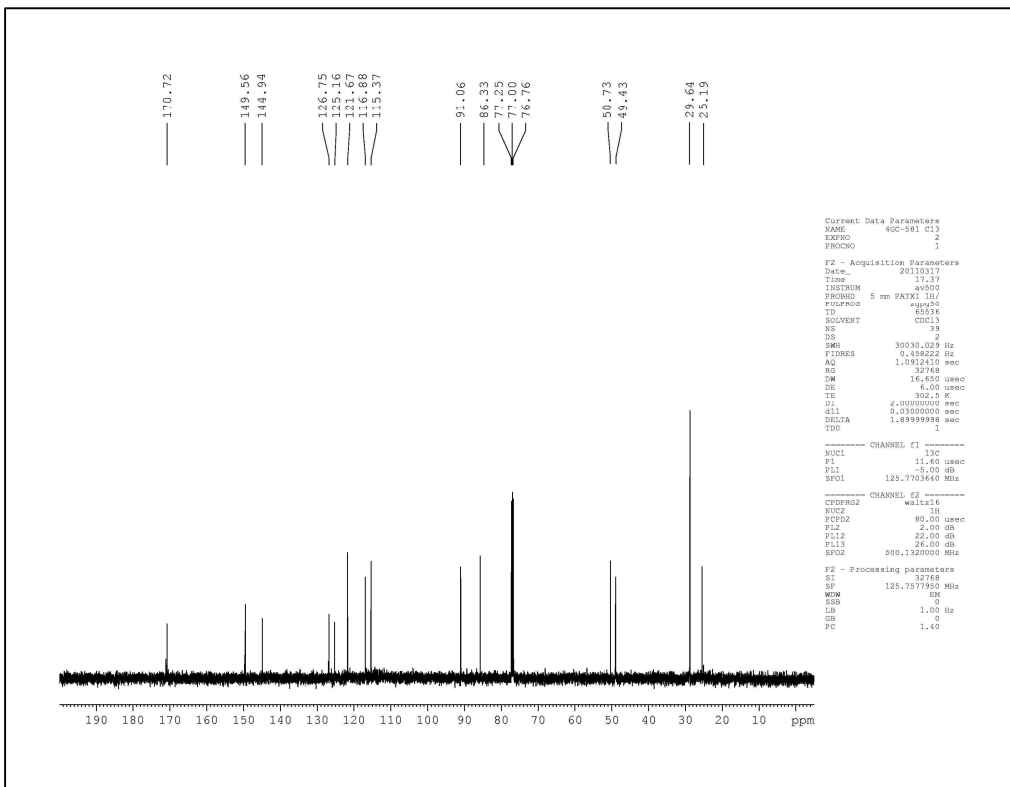

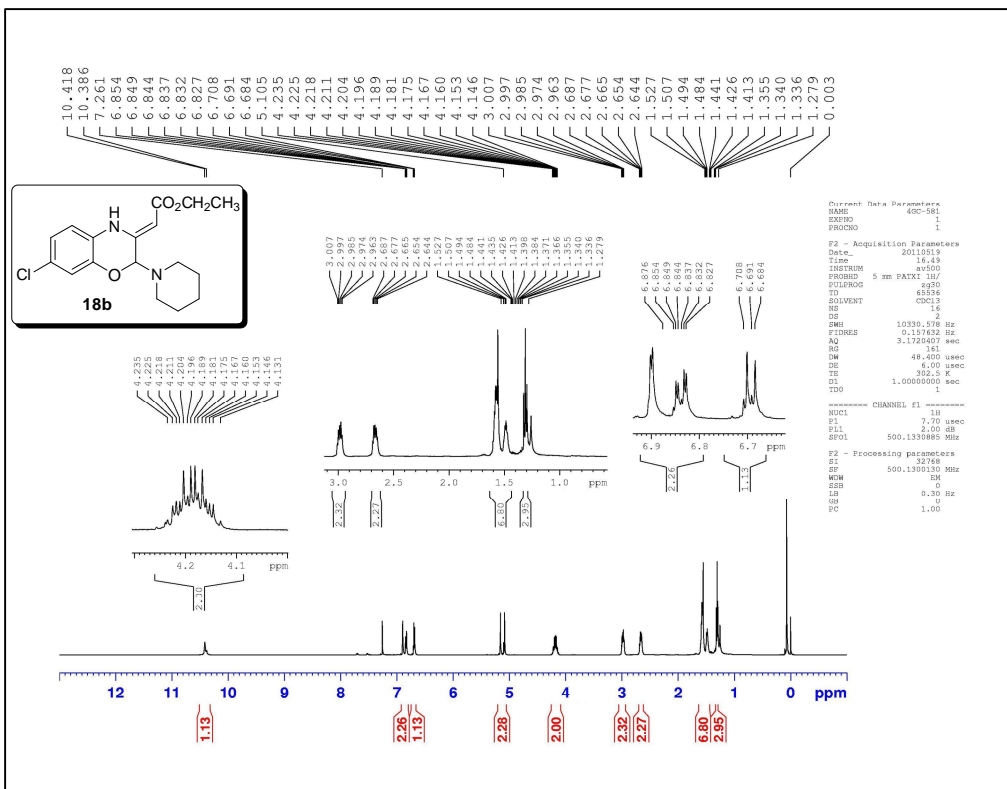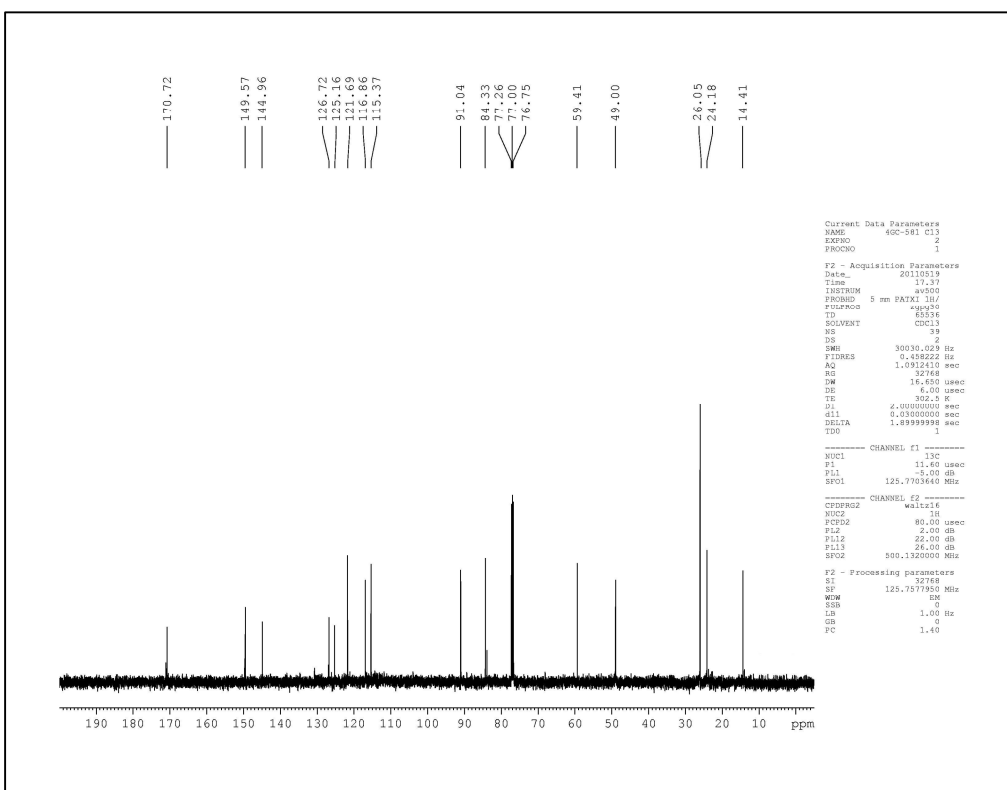

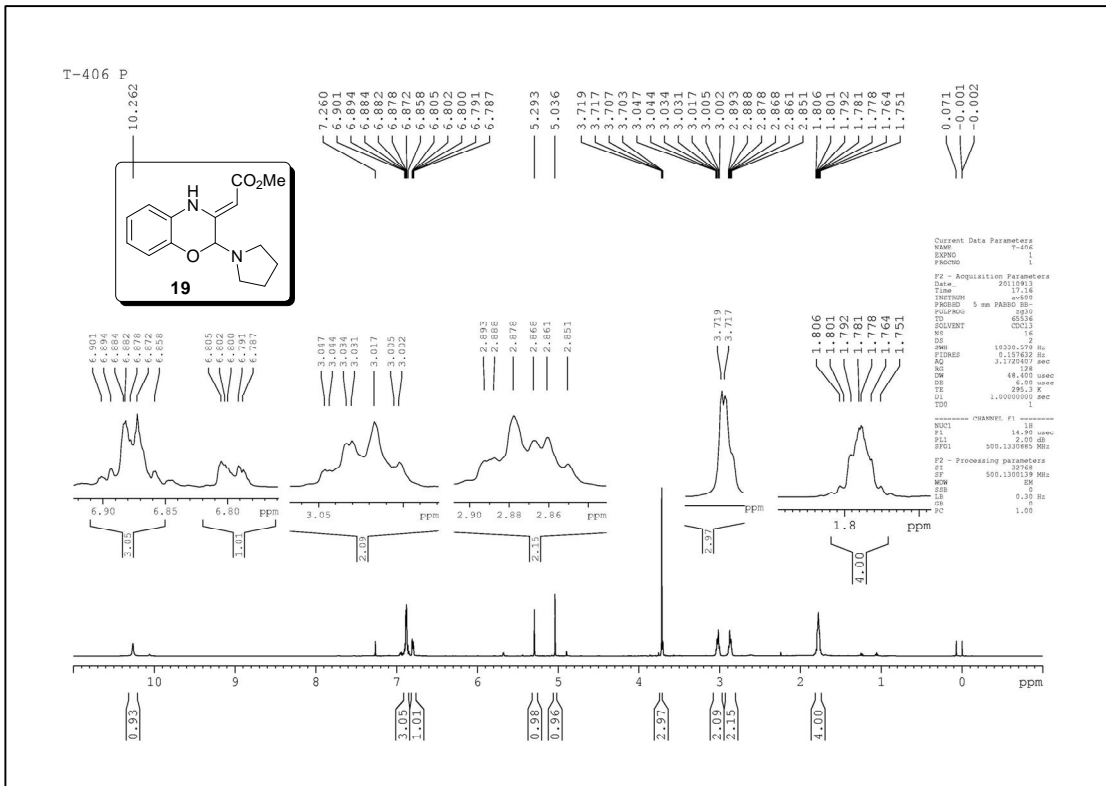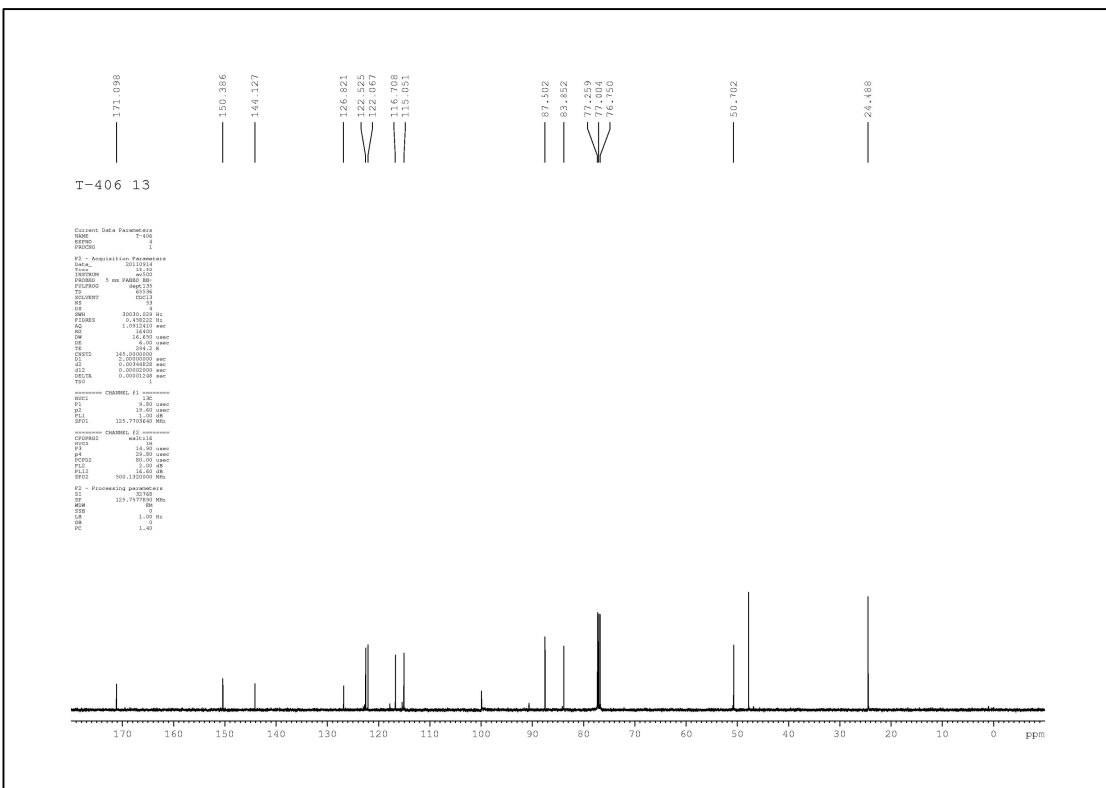









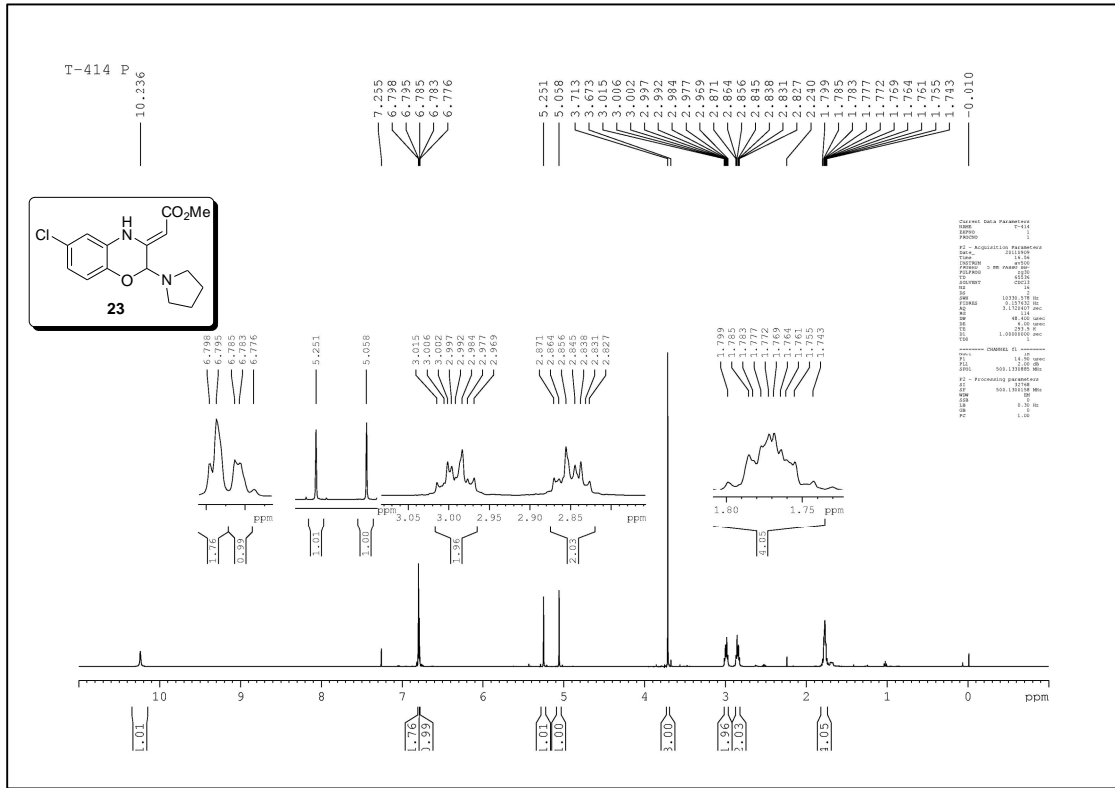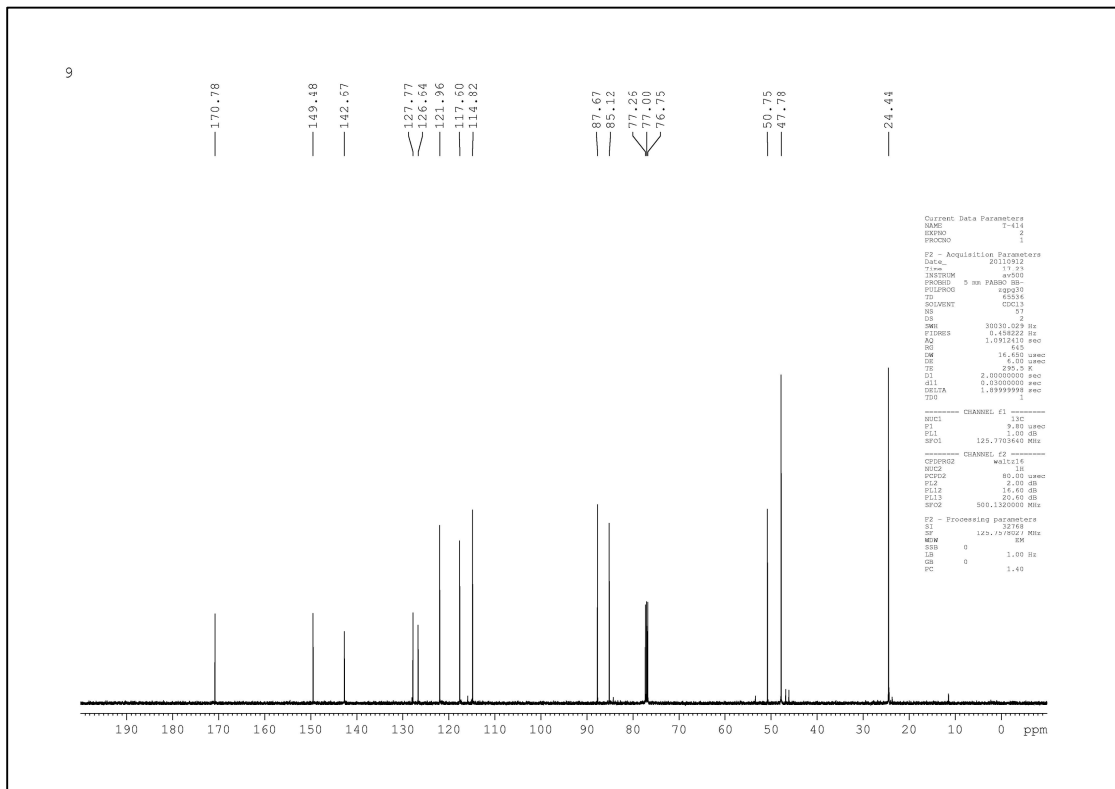

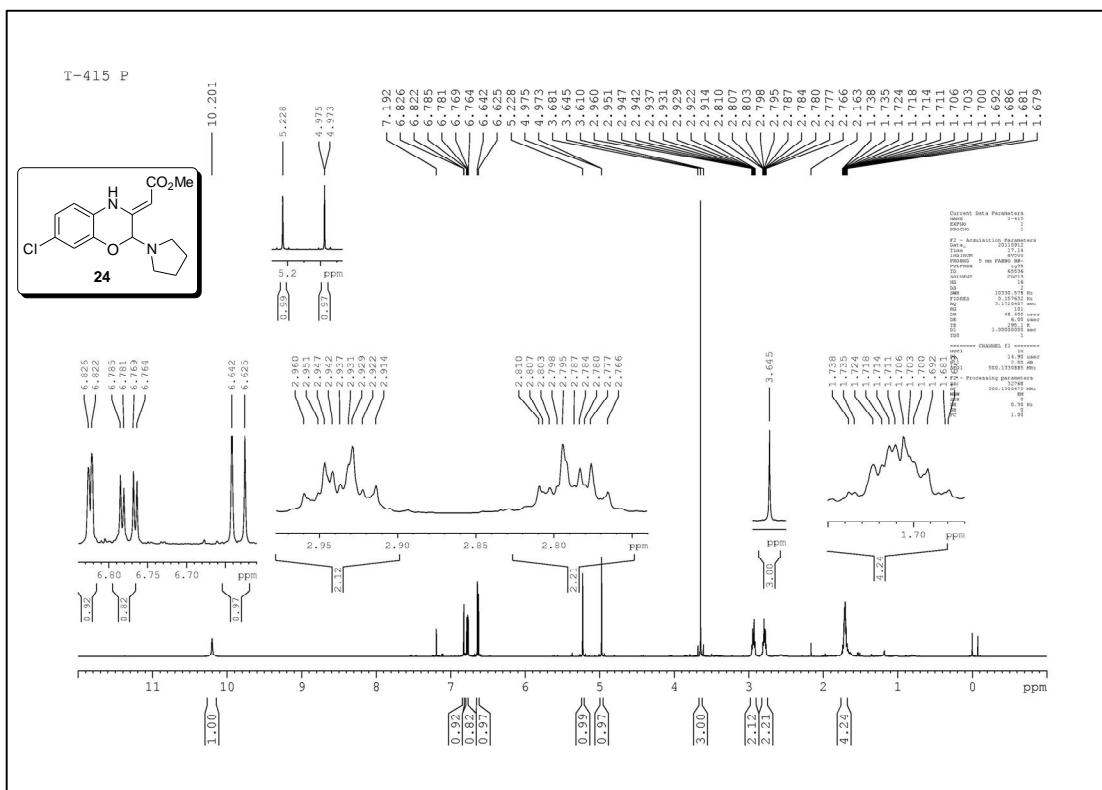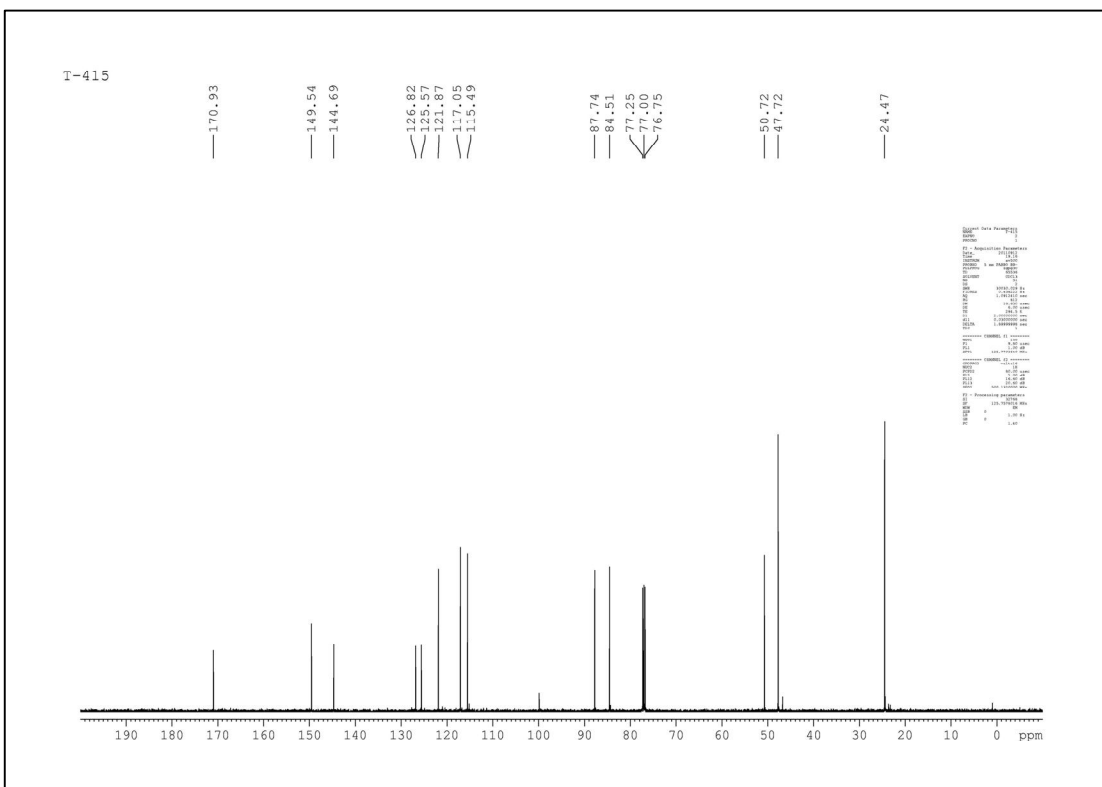

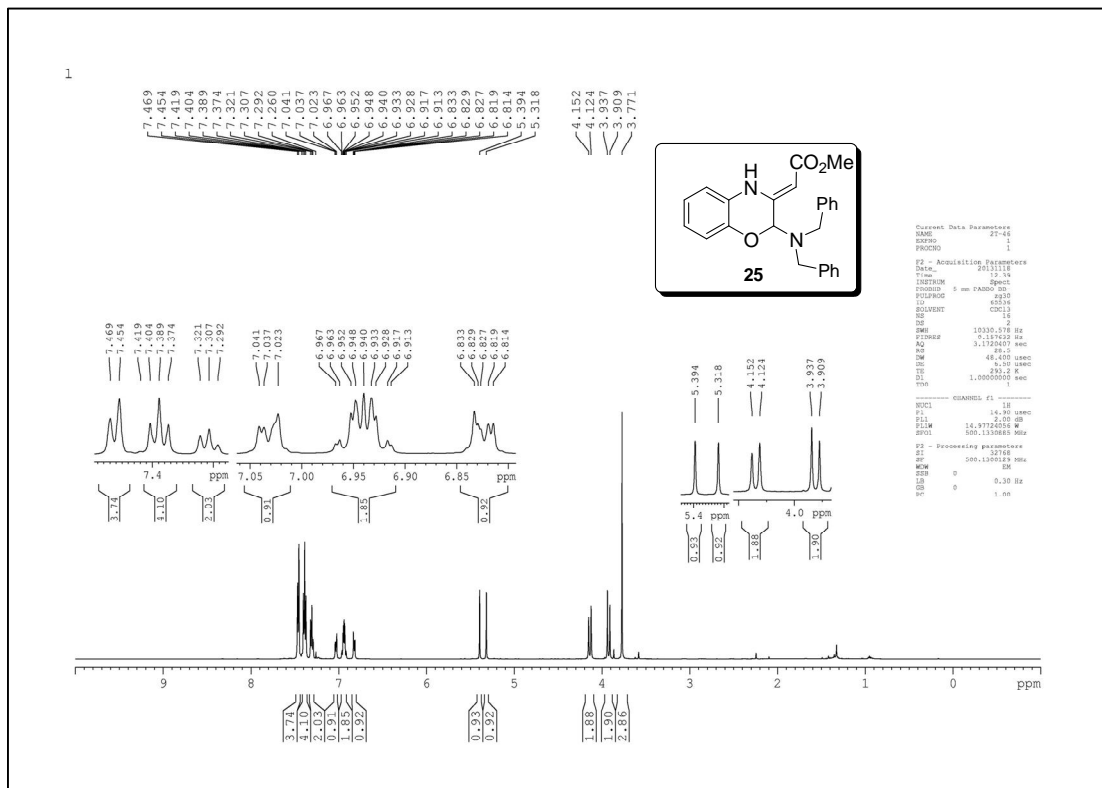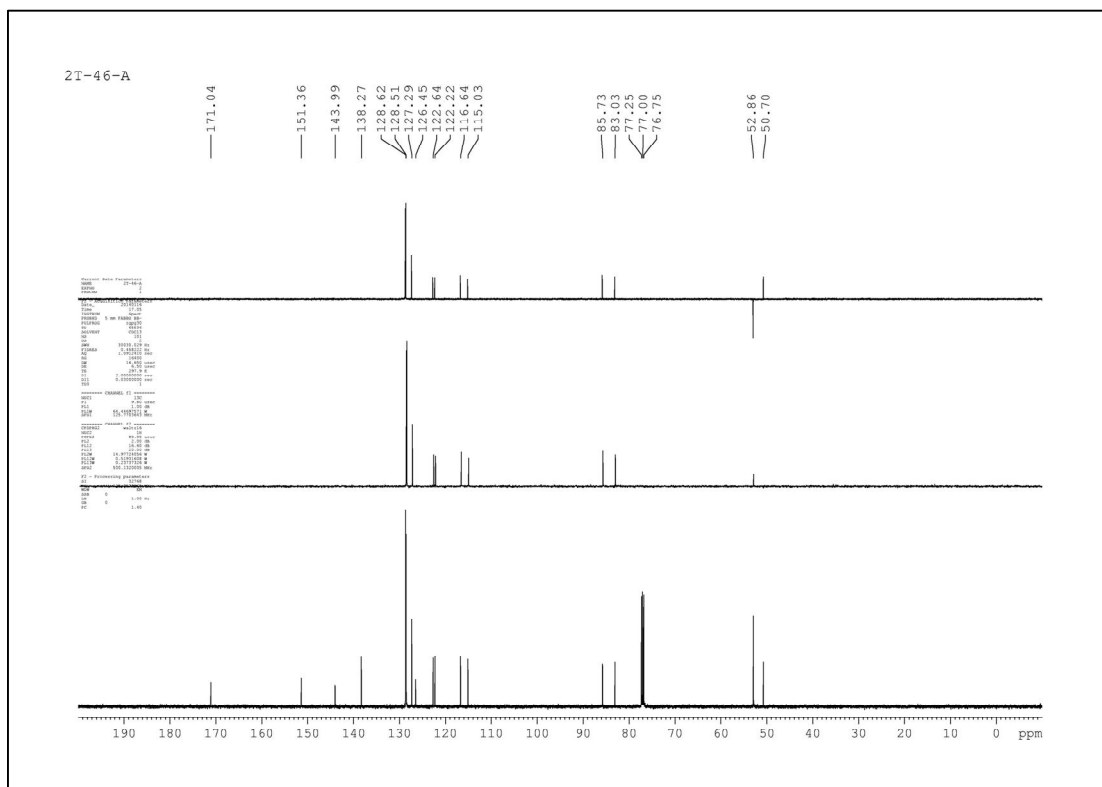

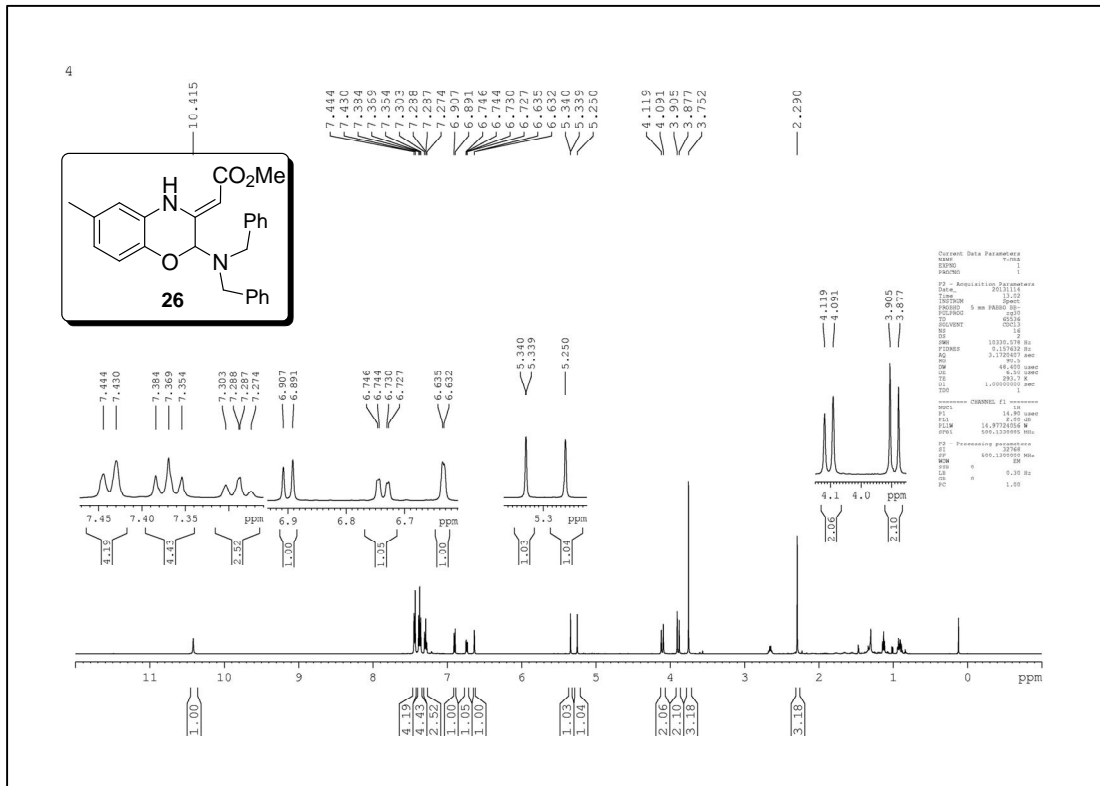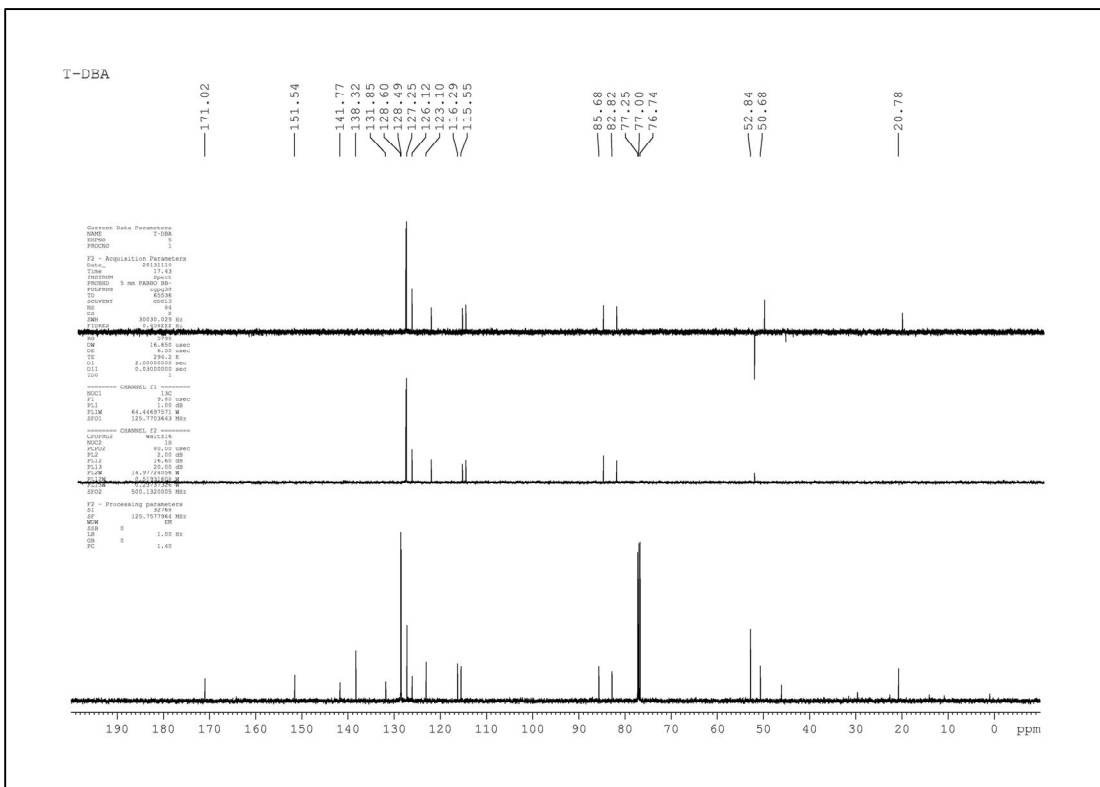

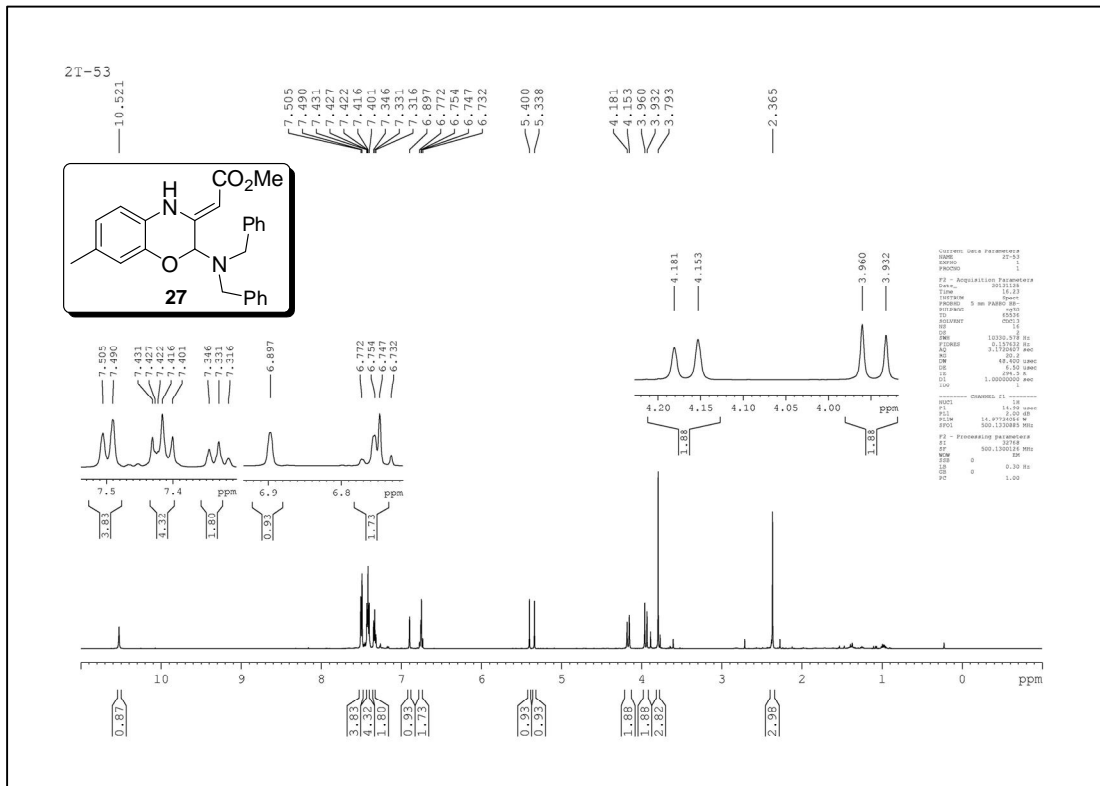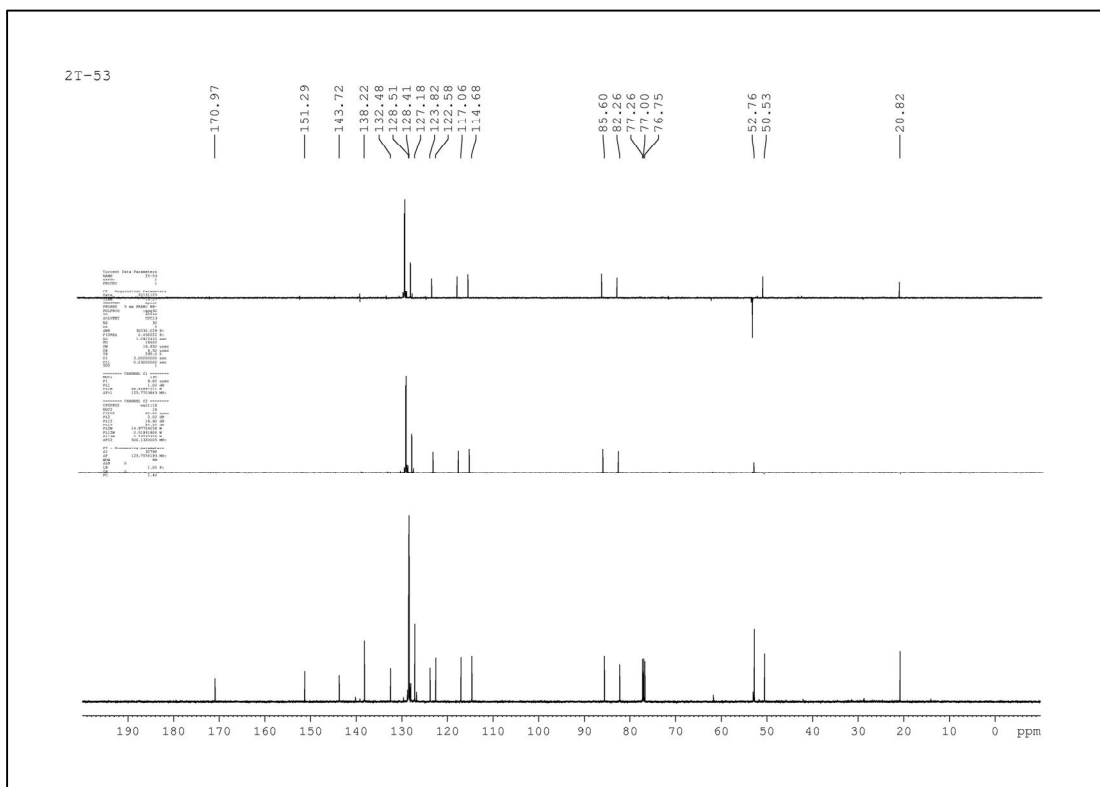



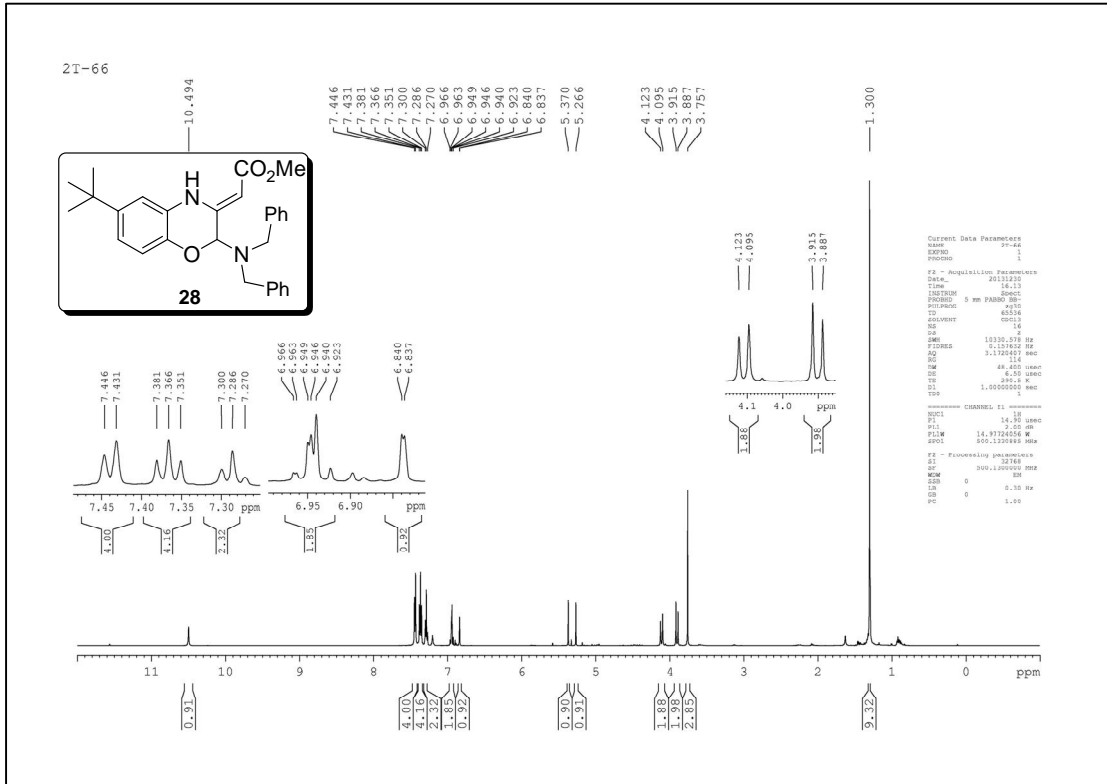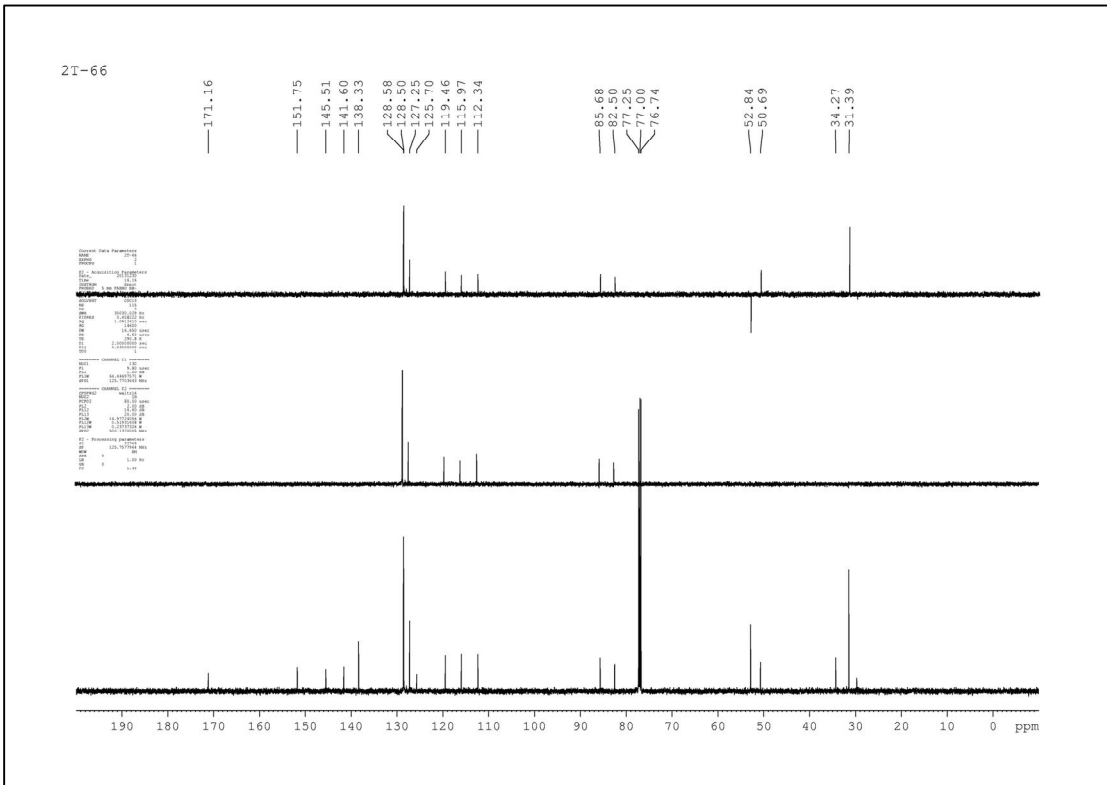



21-58

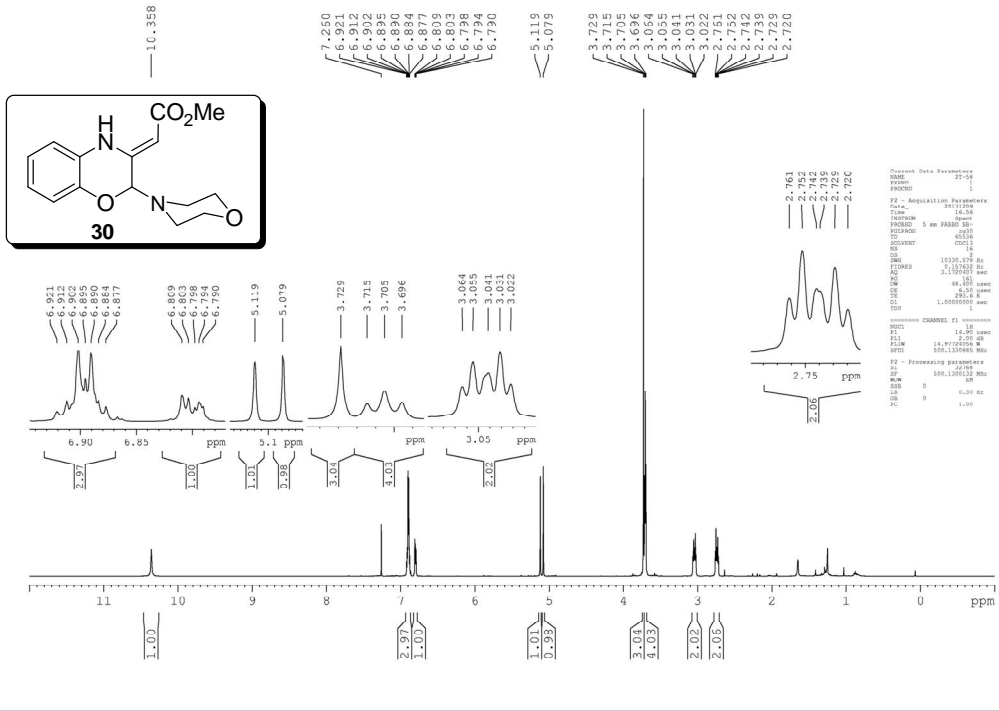

21-58

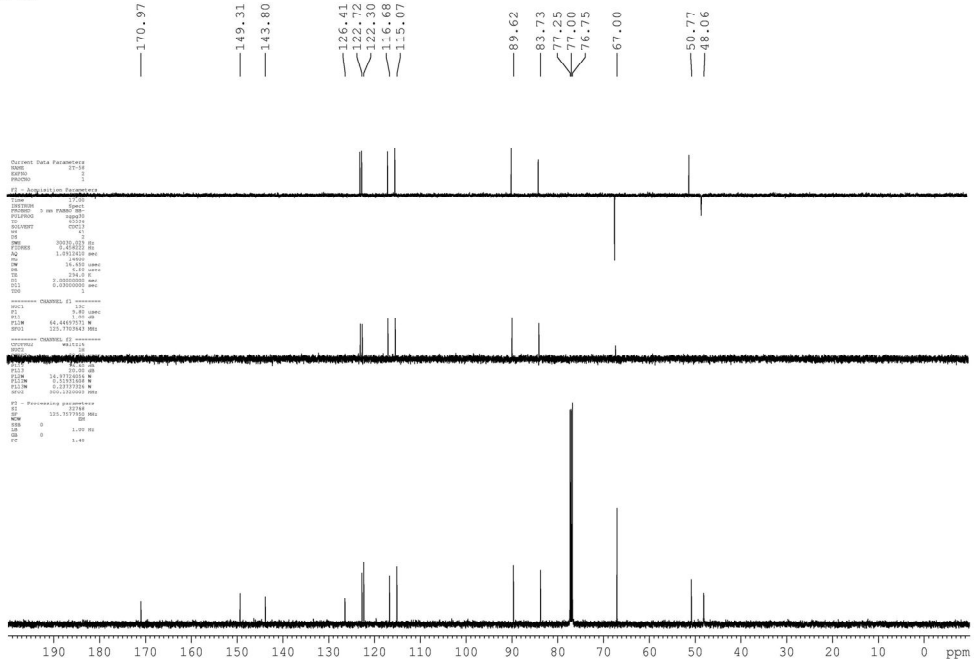



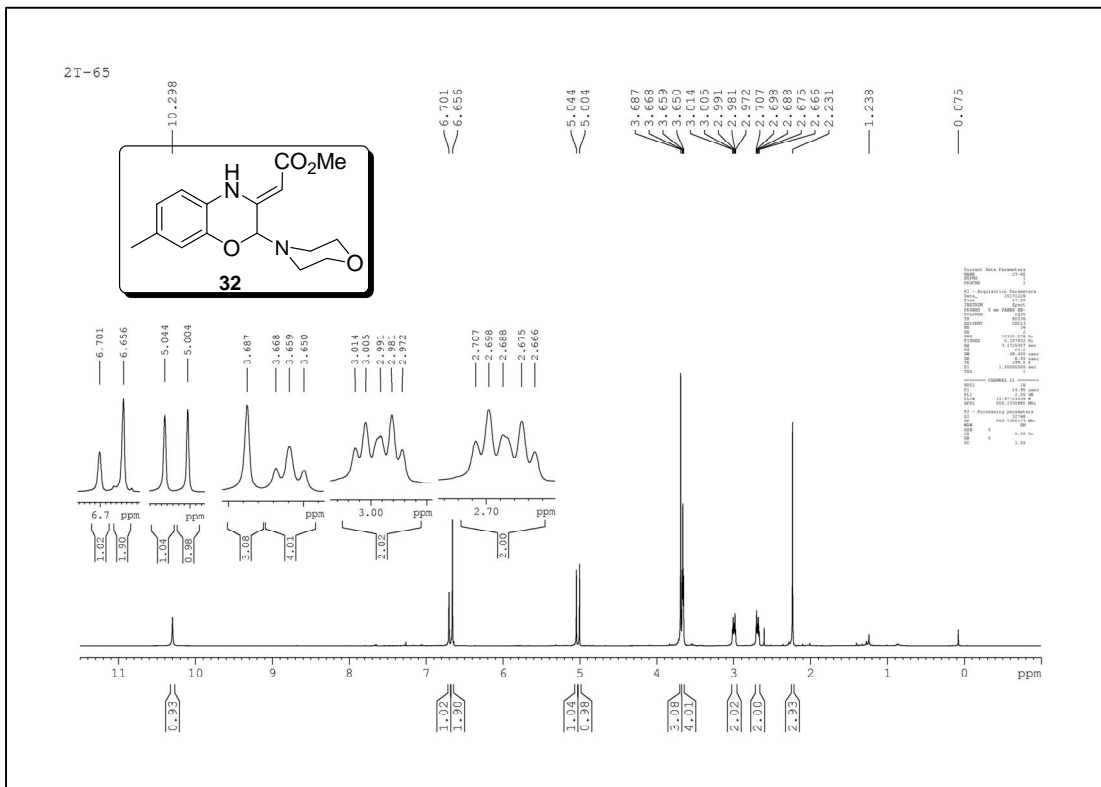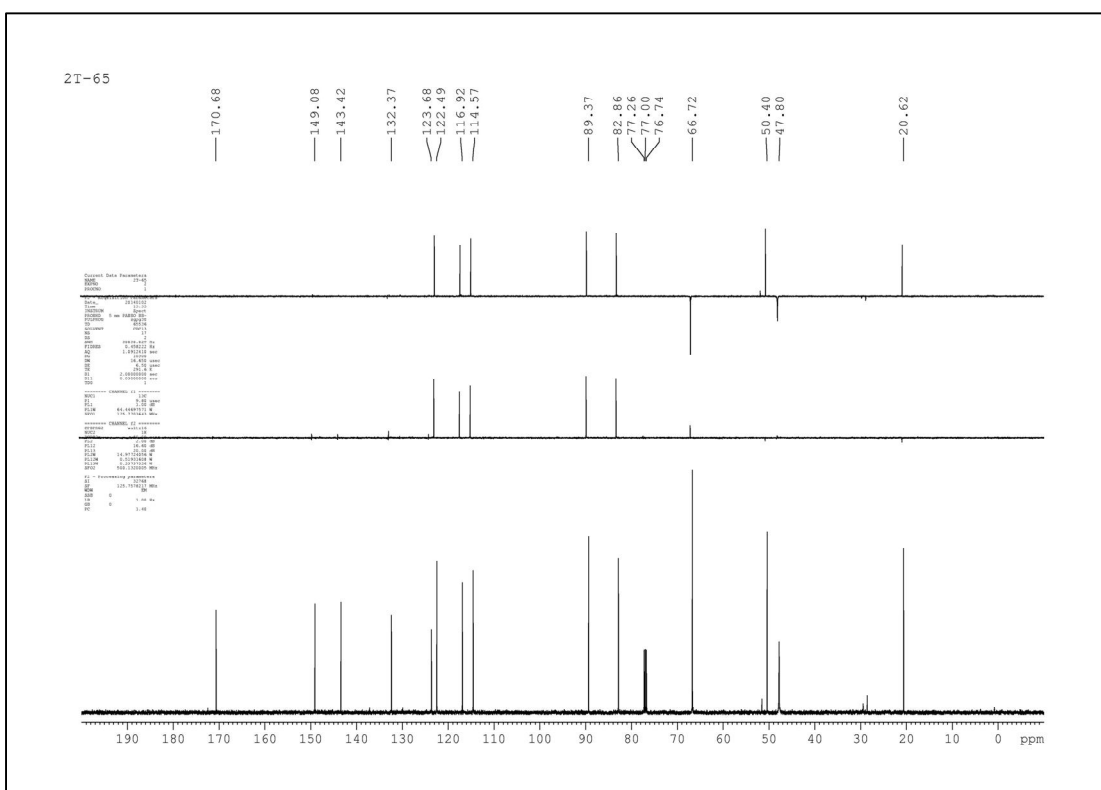

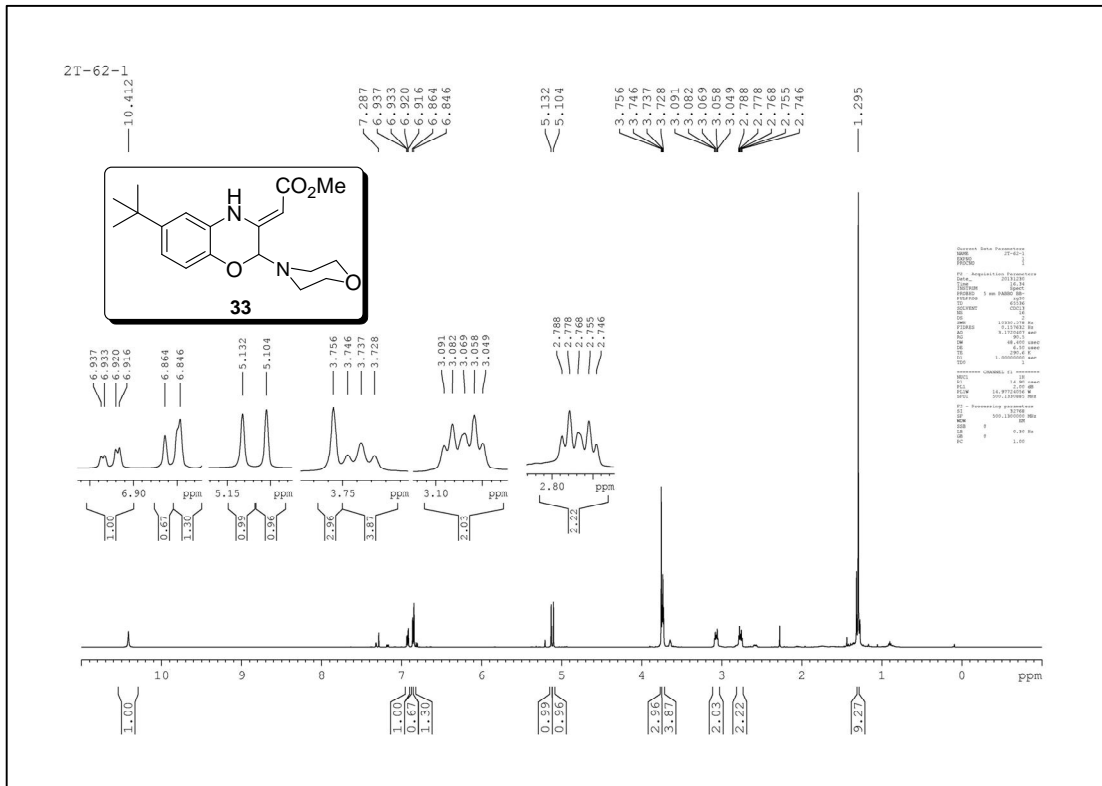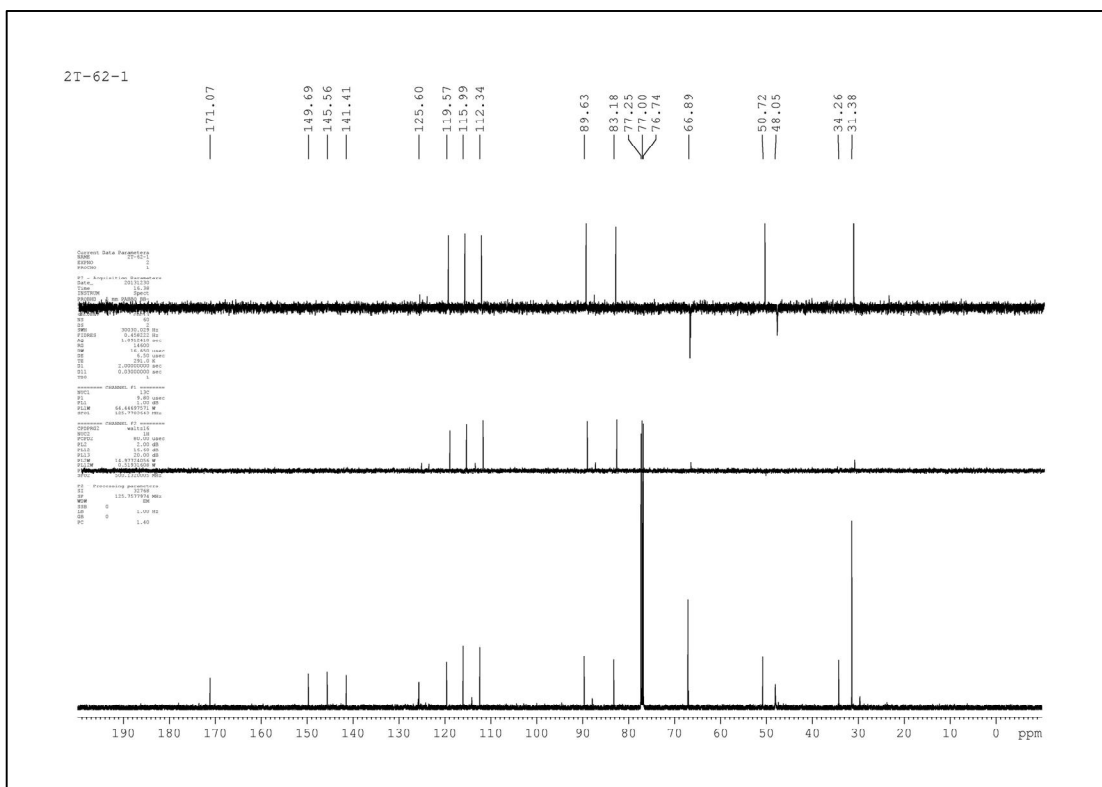



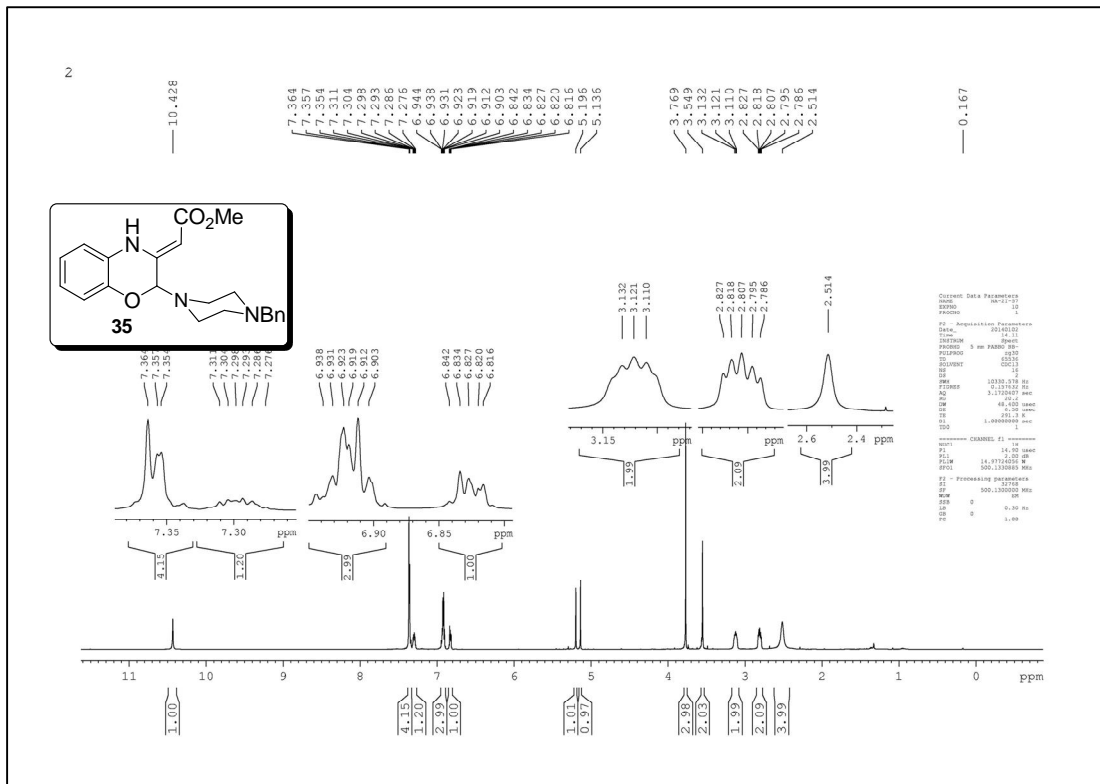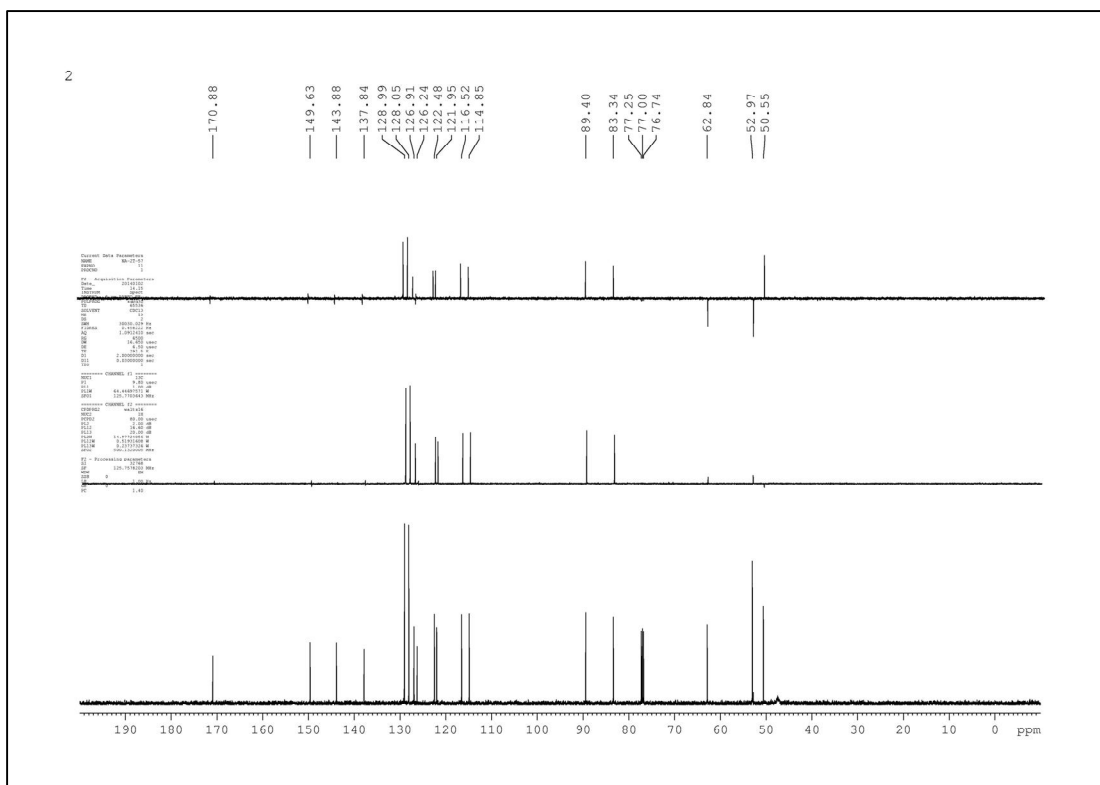



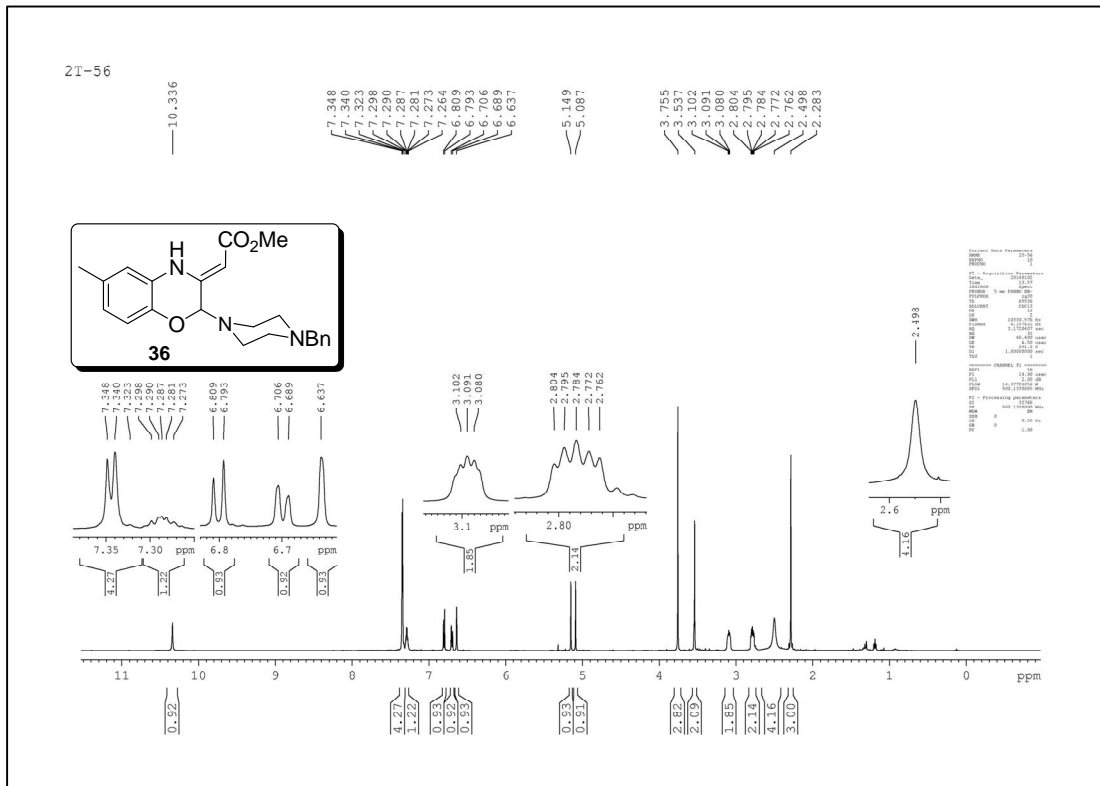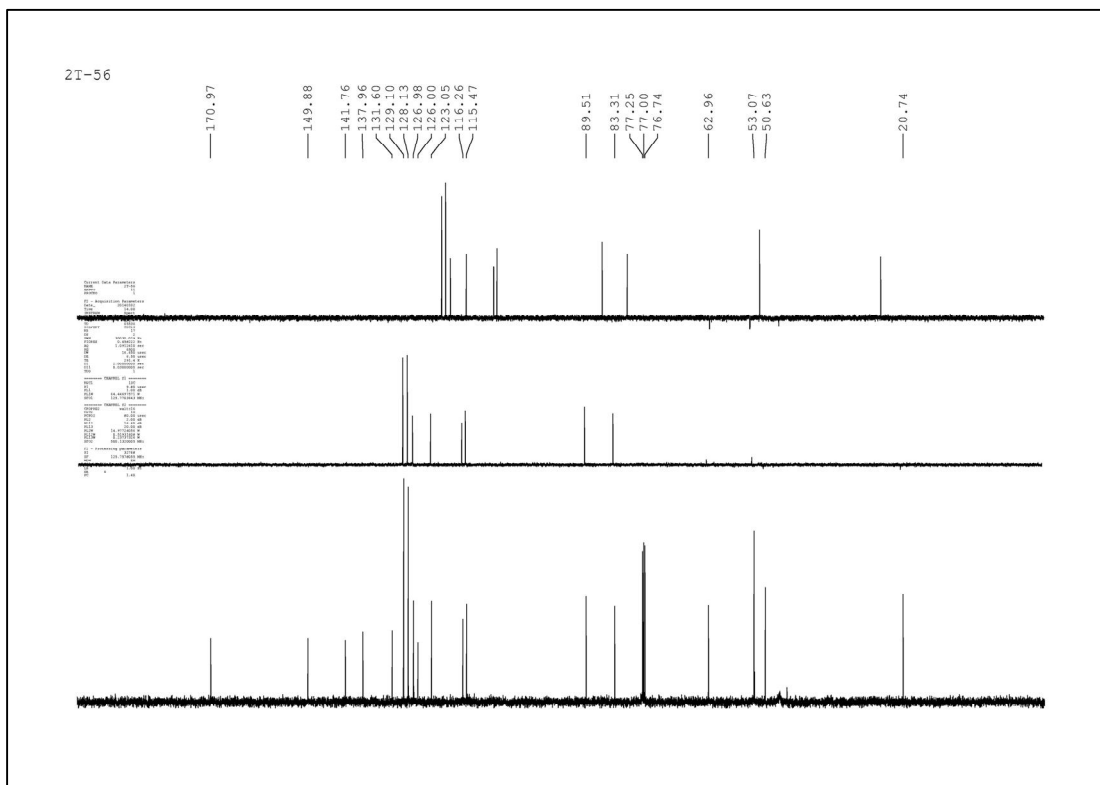

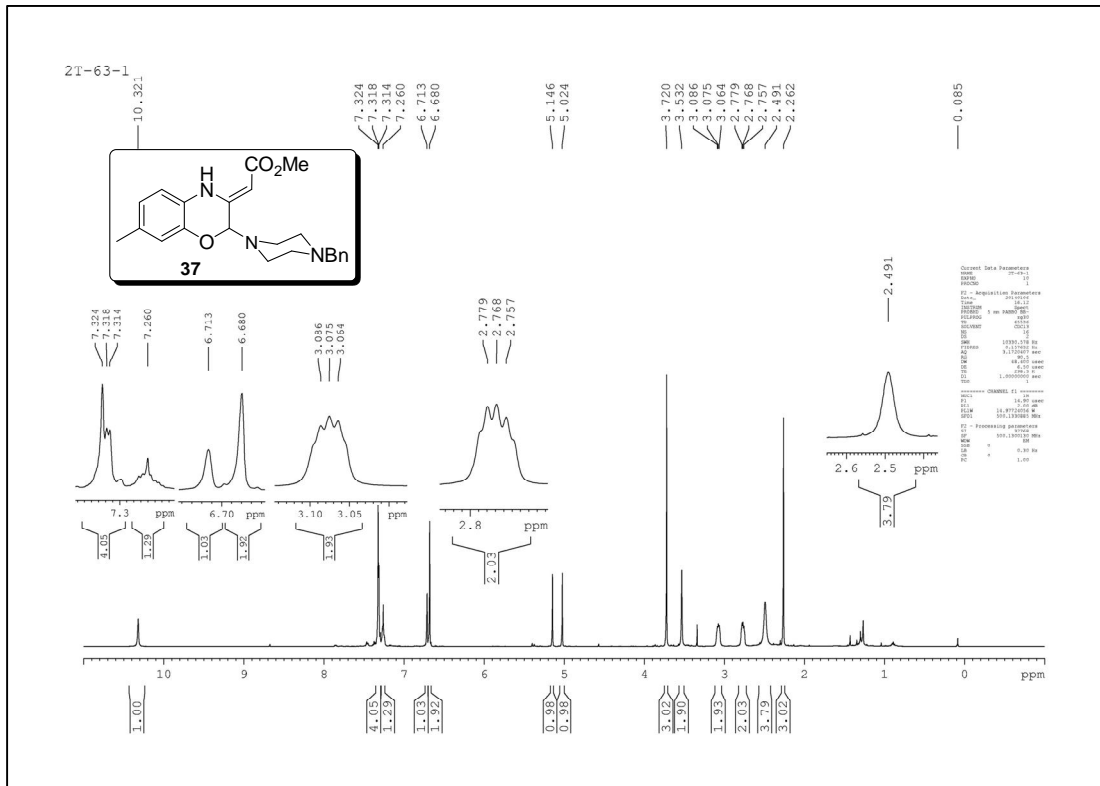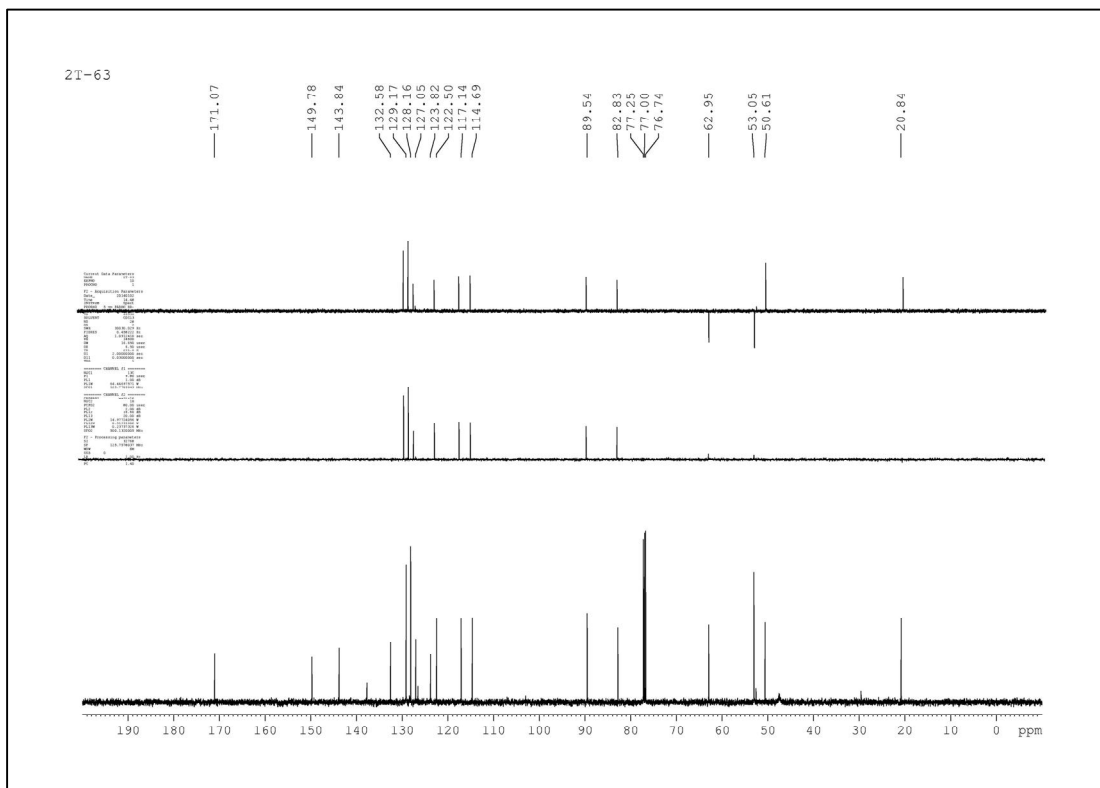

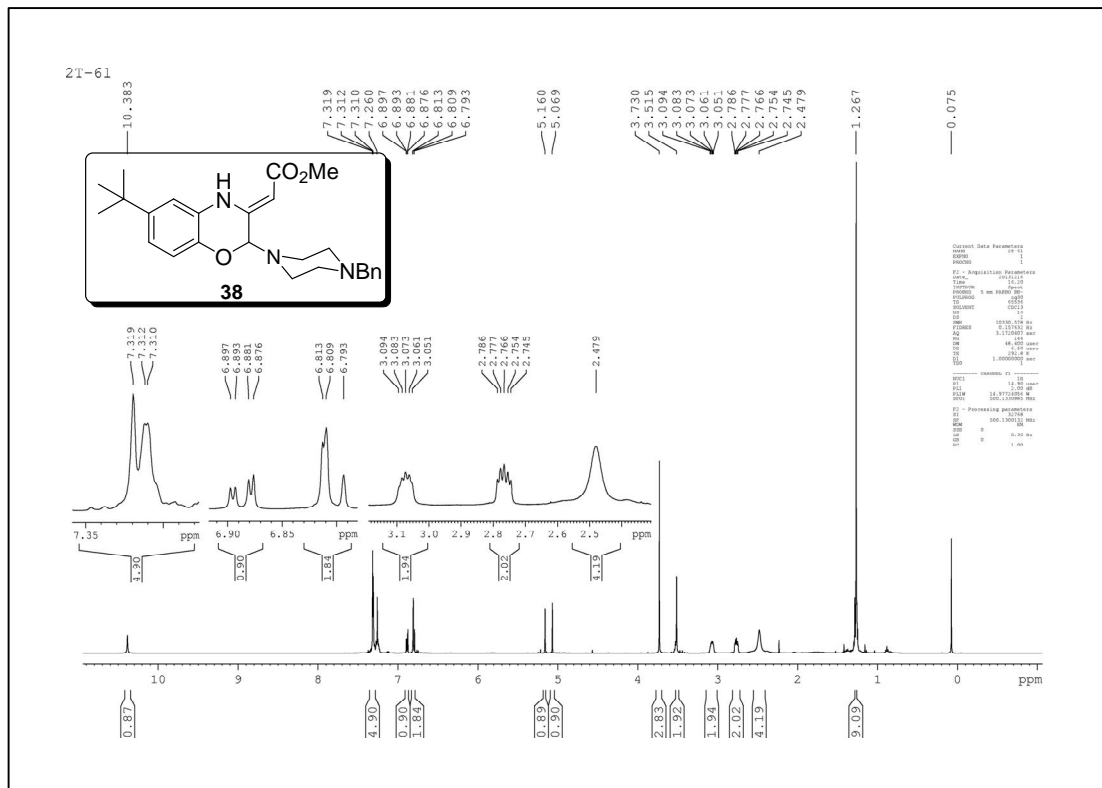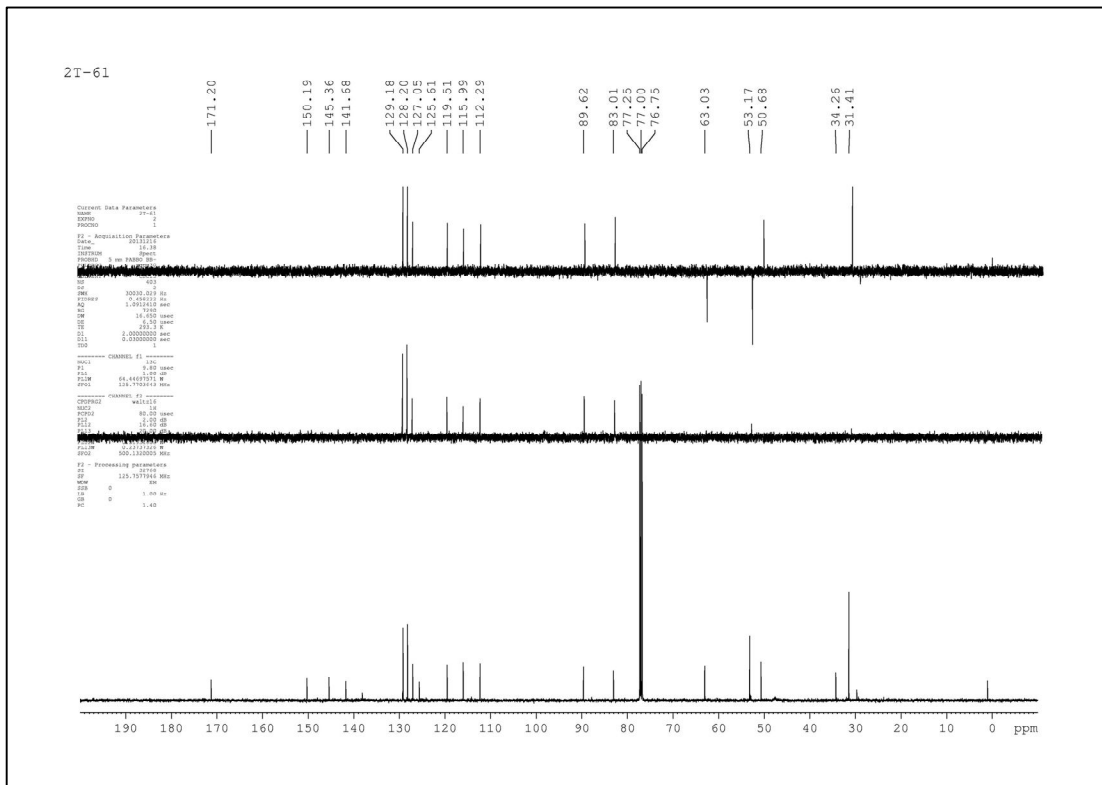

Supplement: c4ra01736f1.pdf [file c4ra01736f1.pdf]
